# Supplementary material for: Novel sugar-conjugated Knoevenagel condensate curcumin derivatives as promising bioactive hybrids with antimalarial potential
Source: Royal Society of Chemistry journal article supplement (doi:10.1039/d5ra09343k), 2026-05-12
Supplement: d5ra09343k1.pdf [file d5ra09343k1.pdf]

## Novel sugar-conjugated Knoevenagel condensate curcumin derivatives as promising bioactive hybrids with antimalarial potential

Siti Nur Hidayah Jamil,<sup>\*a,b</sup> Natsuhisa Oka,<sup>\*a,c,d,e</sup> Amatul Hamizah Ali,<sup>b</sup> Yan Hong Ng,<sup>f</sup> Nur Fatin Najihah Marzuki,<sup>g</sup> Shevin Rizal Feroz,<sup>f,h</sup> Su Datt Lam,<sup>h,i,j</sup> Fauze Mahmud,<sup>k,l</sup> Yusmazura Zakaria<sup>g</sup> and Jalifah Latip<sup>\*b,m</sup>

<sup>a</sup> International Joint Department of Materials Science and Engineering between National University of Malaysia and Gifu University, Graduate School of Engineering, Gifu University, 1-1 Yanagido, Gifu 501-1193, Japan

<sup>b</sup> Department of Chemical Sciences, Faculty of Science and Technology, Universiti Kebangsaan Malaysia, UKM Bangi 43600, Selangor, Malaysia

<sup>c</sup> Department of Chemistry and Biomolecular Science, Faculty of Engineering, Gifu University, 1-1 Yanagido, Gifu 501-1193, Japan

<sup>d</sup> Center for One Medicine Innovative Translational Research (COMIT), Institute for Advanced Study, Gifu University, 1-1 Yanagido, Gifu 501-1193, Japan

<sup>e</sup> Institute for Glyco-core Research (iGCORE), Gifu University, Gifu 501-1193, Japan

<sup>f</sup> Department of Biological Sciences and Biotechnology, Faculty of Science and Technology, Universiti Kebangsaan Malaysia, UKM Bangi 43600, Selangor, Malaysia

<sup>g</sup> Biomedicine Programme, School of Health Sciences, Health Campus, Universiti Sains Malaysia, Kota Bharu 16150, Kelantan, Malaysia

<sup>h</sup> Structural Biology and Protein Engineering Research Group, Universiti Kebangsaan Malaysia, Bangi 43600, Selangor, Malaysia

<sup>i</sup> Department of Applied Physics, Faculty of Science and Technology, Universiti Kebangsaan Malaysia, UKM Bangi 43600, Selangor, Malaysia

<sup>j</sup> Center for Global Health Research (CGHR), Saveetha Medical College, Saveetha Institute of Medical and Technical Sciences (SIMATS), Saveetha University, Chennai 602 105, Tamil Nadu, India

<sup>k</sup> Faculty of Science and Technology, Universiti Malaysia Sabah, Jalan UMS, Kota Kinabalu 88400, Sabah, Malaysia

<sup>l</sup> BioAgriTech Research (BioATR) Group, Faculty of Science and Technology, Universiti Malaysia Sabah, Jalan UMS, Kota Kinabalu 88400, Sabah, Malaysia

<sup>m</sup> Smart Material and Sustainable Product Innovation (SMatSPin) Research, Universiti Kebangsaan Malaysia, UKM Bangi 43600, Selangor, Malaysia

\* Corresponding author: Siti Nur Hidayah Jamil, Email: [sitinh.jamil@gmail.com](mailto:sitinh.jamil@gmail.com); Prof. Dr. Natsuhisa Oka, Email: [oka.natsuhisa.f9@f.gifu-u.ac.jp](mailto:oka.natsuhisa.f9@f.gifu-u.ac.jp); Assoc. Prof. Dr. Jalifah Latip, Email: [jalifah@ukm.edu.my](mailto:jalifah@ukm.edu.my).

### Supplementary Information

#### Table of contents

|    |                                                                  |     |
|----|------------------------------------------------------------------|-----|
| 1. | Characterisation of the synthesised sugar-conjugated derivatives | S1  |
| 2. | NMR spectra of the synthesised sugar-conjugated derivatives      | S6  |
| 3. | <i>In vitro</i> pLDH antiplasmodial activity                     | S29 |
| 4. | Cytotoxicity from MTT WRL-68 assay                               | S32 |
| 5. | Binding interactions to GSK-3 $\beta$ from molecular docking     | S34 |
| 6. | DFT geometry optimisation analysis                               | S39 |
| 7. | Haemin binding potential                                         | S43 |
| 8. | References                                                       | S44 |

## 1. Characterisation of the synthesised sugar-conjugated derivatives

### 1.1 General information

Chemicals and reagents were purchased from commercial sources and used without further purification. Solvents were purchased in gallons and were dried according to the established procedure [31]. All reactions were performed in glassware with a Teflon-coated stirring bar. Kieselgel 60 F254 TLC plates (Merck, Germany) were used and visualised under ultraviolet (UV) light at 254 nm and/or by heating after treatment with ethanolic anisaldehyde solution. Purified products were obtained through column chromatography using Kanto silica gel 60N (spherical, neutral, 63–210  $\mu\text{m}$ ) or reverse-phase (RP) column chromatography using Waters Sep-Pak<sup>®</sup> Vac 35cc C<sub>10</sub> 10g (Waters Corporation, Milford, MA, USA). Purified compounds were characterised and identified by Nuclear Magnetic Resonance (NMR) and high-resolution mass spectrometry (HR-MS). <sup>1</sup>H and <sup>13</sup>C NMR spectra were measured in CDCl<sub>3</sub> and CD<sub>3</sub>OD using Bruker Fourier Transform FT-NMR (400 MHz) (Karlsruhe, Germany) available in the i-CRIM laboratory, Universiti Kebangsaan Malaysia (UKM) or JEOL JNM-ECS-400 spectrometer (Japan) available at the Graduate School of Engineering, Gifu University, Japan and analysed using ACD/Labs NMR Processor software with chemical shifts ( $\delta$ ) reported in parts per million (ppm). <sup>1</sup>H NMR data is presented based on a standardised format, which includes chemical shift (multiplicity, *J* coupling constant, proton number), integration values, and multiplicity designations. Multiplicity is indicated as follows: s = singlet, d = doublet, t = triplet, q = quartet, br = broad, dd = doublet of doublet, dt = doublet of triplet, ddd = doublet of doublet of doublet, dq = doublet of quartet, tdd = triplet of doublet of doublet, m = multiplet. HR-MS were obtained on a Waters Xevo D-TOF mass spectrometer available at the Graduate School of Engineering, Gifu University, Japan in electrospray ionisation (ESI) mode.

### 1.2 Sugar-conjugated benzaldehyde intermediates

#### **(2R,3S,4S,5R,6S)-2-(acetoxymethyl)-6-(4-formylphenoxy)tetrahydro-2H-pyran-3,4,5-triyltriacetate (9a)**

This compound was obtained as yellowish concentrate (0.165 g, 0.364 mmol, 93%). <sup>1</sup>H-NMR (400 MHz, CDCl<sub>3</sub>)  $\delta$  (ppm): 9.85 (s, 1H), 7.80–7.76 (m, *J* = 9.2 Hz, 2H), 7.06–7.01 (m, *J* = 8.7 Hz, 2H), 5.30–5.20 (m, 2H), 5.20–5.14 (m, 1H), 5.14–5.08 (m, 1H), 4.22 (dd, *J* = 5.5, 12.4 Hz, 1H), 4.11 (dd, *J* = 2.3, 12.4 Hz, 1H), 3.92–3.86 (m, 1H), 2.00 (s, 3H), 1.98 (s, 3H), 1.97 (s, 3H), 1.96 (s, 3H).

#### **(2R,3R,4S,5R,6S)-2-(acetoxymethyl)-6-(4-formylphenoxy)tetrahydro-2H-pyran-3,4,5-triyltriacetate (9b)**

This compound was obtained as yellowish concentrate (0.129 g, 0.285 mmol, 73%). <sup>1</sup>H-NMR (400 MHz, CDCl<sub>3</sub>)  $\delta$  (ppm): 9.93 (s, 1H), 7.88–7.84 (m, *J* = 8.7 Hz, 2H), 7.14–7.09 (m, *J* = 8.7 Hz, 2H), 5.37–5.28 (m, 2H), 5.26–5.23 (m, 1H), 5.22–5.16 (m, 1H), 4.30 (dd, *J* = 5.5, 12.4 Hz, 1H), 4.19 (dd, *J* = 2.8, 12.4 Hz, 1H), 3.99–3.93 (m, 1H), 2.08 (s, 3H), 2.07 (s, 3H), 2.07 (s, 3H), 2.05 (s, 3H)

#### **(2R,3R,4S,5S,6S)-2-(acetoxymethyl)-6-(4-formylphenoxy)tetrahydro-2H-pyran-3,4,5-triyl triacetate (9c)**

This compound was obtained as yellowish concentrate (0.0619 g, 0.137 mmol, 35%). <sup>1</sup>H-NMR (400 MHz, CDCl<sub>3</sub>)  $\delta$  (ppm): 9.90 (s, 1H), 7.81–7.76 (m, *J* = 8.7 Hz, 2H), 7.25–7.21 (m, 2H), 5.45 (dd, *J* = 1.4, 2.8 Hz, 1H), 5.36–5.21 (m, 2H), 5.14–5.08 (m, 1H), 4.43–4.37 (m, 1H), 4.24–4.18 (m, 1H), 3.72–3.66 (m, 1H), 2.10 (s, 3H), 2.05 (s, 3H), 2.03 (s, 3H), 1.86 (s, 3H).

#### **(2R,3S,4S,5R,6S)-2-(acetoxymethyl)-6-(4-formyl-2-methoxyphenoxy)tetrahydro-2H-pyran-3,4,5-triyltriacetate (10a)**

This compound was obtained as yellowish concentrate (0.160 g, 0.332 mmol, 85%). <sup>1</sup>H-NMR (400 MHz, CDCl<sub>3</sub>)  $\delta$  (ppm): 9.84 (s, 1H), 7.38 (s, 1H), 7.36 (d, *J* = 1.4 Hz, 1H), 7.19 (d, *J* = 8.7 Hz, 1H), 5.50 (dd, *J* = 8.0, 10.3 Hz, 1H), 5.41 (d, *J* = 3.2 Hz, 1H), 5.08 (dd, *J* = 3.4, 10.3 Hz, 1H), 5.02 (d, *J* = 7.8 Hz, 1H), 4.21–4.09 (m, 2H), 4.05–4.02 (m, 1H), 3.84 (s, 3H), 2.12 (s, 3H), 2.02 (s, 3H), 2.00 (s, 3H), 1.97 (s, 3H).

#### **(2R,3R,4S,5R,6S)-2-(acetoxymethyl)-6-(4-formyl-2-methoxyphenoxy)tetrahydro-2H-pyran-3,4,5-triyltriacetate (10b)**

This compound was obtained as yellowish concentrate (0.121 g, 0.250 mmol, 64%). <sup>1</sup>H-NMR (400 MHz, CDCl<sub>3</sub>)  $\delta$  (ppm): 9.90 (s, 1H), 7.44 (s, 1H), 7.43–7.40 (m, 1H), 7.22 (d, *J* = 7.8 Hz, 1H), 5.34–5.30 (m, 2H), 5.21–5.15 (m, 1H), 5.14–5.10 (m, 1H), 4.28 (dd, *J* = 5.0, 12.4 Hz, 1H), 4.19 (dd, *J* = 2.8, 12.4 Hz, 1H), 3.90 (s, 3H), 3.88–3.84 (m, 1H), 2.08 (s, 3H), 2.08 (s, 3H), 2.06 (s, 3H), 2.05 (s, 3H).

**(2R,3R,4S,5S,6S)-2-(acetoxymethyl)-6-(4-formyl-2-methoxyphenoxy)tetrahydro-2H-pyran-3,4,5-triyltriacetate (10c)**

This compound was obtained as yellowish concentrate (0.0490 g, 0.102 mmol, 26%). <sup>1</sup>H-NMR (400 MHz, CDCl<sub>3</sub>) δ (ppm): 9.78 (s, 1H), 7.32 (d, *J* = 1.4 Hz, 1H), 7.30–7.28 (m, 1H), 7.25 (d, *J* = 5.0 Hz, 1H), 5.44 (d, *J* = 2.8 Hz, 1H), 5.25–5.20 (m, 1H), 5.18 (d, *J* = 9.6 Hz, 1H), 5.10–5.05 (m, 1H), 4.48 (dd, *J* = 2.8, 4.1 Hz, 1H), 4.15–4.10 (m, 1H), 3.78 (s, 3H), 3.67–3.61 (m, 1H), 2.01 (s, 3H), 1.95 (s, 3H), 1.94 (s, 3H), 1.92 (s, 3H).

**(2R,3S,4S,5R,6S)-2-(acetoxymethyl)-6-(3-formylphenoxy)tetrahydro-2H-pyran-3,4,5-triyltriacetate (11a)**

This compound was obtained as yellowish concentrate (0.166 g, 0.368 mmol, 94%). <sup>1</sup>H-NMR (400 MHz, CDCl<sub>3</sub>) δ (ppm): 9.96 (s, 1H), 7.56 (dd, *J* = 0.9, 7.3 Hz, 1H), 7.49–7.48 (m, 1H), 7.47–7.43 (m, 1H), 7.24 (tdd, *J* = 1.3, 2.4, 8.2 Hz, 1H), 5.48 (dd, *J* = 8.0, 10.3 Hz, 1H), 5.40 (d, *J* = 3.2 Hz, 1H), 5.07 (dd, *J* = 3.4, 10.3 Hz, 1H), 5.01 (d, *J* = 7.8 Hz, 1H), 4.20–4.07 (m, 2H), 4.05–4.00 (m, 1H), 2.11 (s, 3H), 2.01 (s, 3H), 1.98 (s, 3H), 1.95 (s, 3H).

**(2R,3R,4S,5R,6S)-2-(acetoxymethyl)-6-(3-formylphenoxy)tetrahydro-2H-pyran-3,4,5-triyltriacetate (11b)**

This compound was obtained as yellowish concentrate (0.133 g, 0.293 mmol, 75%). <sup>1</sup>H-NMR (400 MHz, CDCl<sub>3</sub>) δ (ppm): 9.97 (s, 1H), 7.59 (dd, *J* = 0.9, 7.3 Hz, 1H), 7.52–7.51 (m, 1H), 7.51–7.46 (m, 1H), 7.28–7.24 (m, 1H), 5.36–5.27 (m, 2H), 5.21–5.13 (m, 2H), 4.30–4.23 (m, 1H), 4.23–4.17 (m, 1H), 3.99–3.91 (m, 1H), 2.10 (s, 3H), 2.07 (s, 3H), 2.06 (s, 3H), 2.04 (s, 3H).

**(3aS,5R,6R,7S,7aS)-5-(acetoxymethyl)-2-(3-formylphenoxy)-2-methyltetrahydro-5H-[1,3]dioxolo[4,5-b]pyran-6,7-diyl diacetate (11c)**

This compound was obtained as yellowish concentrate (0.0566 g, 0.125 mmol, 32%). <sup>1</sup>H-NMR (400 MHz, CDCl<sub>3</sub>) δ (ppm): 9.82 (s, 1H), 7.18 (dd, *J* = 1.8, 3.7 Hz, 1H), 7.16–7.14 (m, 1H), 7.05–7.03 (m, 1H), 7.01 (dd, *J* = 2.1, 8.5 Hz, 1H), 5.23 (t, *J* = 9.6 Hz, 1H), 5.19 (d, *J* = 2.8 Hz, 1H), 4.92 (dd, *J* = 3.9, 9.9 Hz, 1H), 4.21–4.16 (m, 1H), 4.10–4.07 (m, 1H), 4.04 (dd, *J* = 2.5, 3.9 Hz, 1H), 3.51 (ddd, *J* = 3.0, 5.0, 9.4 Hz, 1H), 2.12 (s, 3H), 2.06 (s, 3H), 2.03 (s, 3H), 1.60 (s, 3H).

### 1.3 Acetylated glycoside derivatives

**(2R,3S,4S,5R,6S)-2-(acetoxymethyl)-6-(4-((E)-5-(4-hydroxy-3-methoxyphenyl)-2-((E)-3-(4-hydroxy-3-methoxyphenyl)acryloyl)-3-oxopenta-1,4-dien-1-yl)phenoxy)tetrahydro-2H-pyran-3,4,5-triyl triacetate (2a-Gal)**

This compound was obtained as orange solids (0.346 g, 0.431 mmol, 76%), m.p.: 210–212 °C. <sup>1</sup>H-NMR (400 MHz, CDCl<sub>3</sub>) δ (ppm): 7.77 (s, 1H), 7.72 (d, *J* = 15.6 Hz, 1H), 7.47–7.40 (m, 3H), 7.12 (dd, *J* = 1.6, 8.5 Hz, 1H), 7.02–6.97 (m, 2H), 6.96–6.82 (m, 6H), 6.79 (s, 1H), 6.30–6.17 (m, 2H), 5.29–5.19 (m, 1H), 5.16–5.05 (m, 2H), 4.24 (dd, *J* = 5.3, 12.1 Hz, 2H), 4.13–4.06 (m, 2H), 3.87 (s, 3H), 3.84 (s, 3H), 2.02 (s, 3H), 2.01 (s, 3H), 2.00 (s, 3H), 1.99 (s, 3H). <sup>13</sup>C-NMR (100 MHz, CDCl<sub>3</sub>) δ (ppm): 198.4, 186.8, 170.6, 170.3, 169.5, 169.4, 158.2, 149.1, 148.7, 147.8, 146.9, 146.9, 145.7, 139.8, 139.8, 139.7, 132.3, 128.6, 127.3, 126.6, 125.3, 124.2, 123.8, 119.7, 117.0, 115.0, 114.9, 110.5, 110.0, 98.4, 72.7, 72.2, 71.1, 68.2, 61.9, 56.2, 56.1, 20.7, 20.7, 20.7, 20.7. HRMS (ESI-TOF) *m/z*: [M + H]<sup>+</sup> calculated for C<sub>42</sub>H<sub>42</sub>O<sub>16</sub>: 803.2546, found 803.2531.

**(2R,3R,4S,5R,6S)-2-(acetoxymethyl)-6-(4-((E)-5-(4-hydroxy-3-methoxyphenyl)-2-((E)-3-(4-hydroxy-3-methoxyphenyl)acryloyl)-3-oxopenta-1,4-dien-1-yl)phenoxy)tetrahydro-2H-pyran-3,4,5-triyl triacetate (2a-Glc)**

This compound was obtained as orange solids (0.355 g, 0.442 mmol, 78%), m.p.: 212–213 °C. <sup>1</sup>H-NMR (400 MHz, CDCl<sub>3</sub>) δ (ppm): 7.79 (s, 1H), 7.75 (d, *J* = 15.3 Hz, 1H), 7.49–7.43 (m, 3H), 7.15 (dd, *J* = 2.0, 8.3 Hz, 1H), 7.03 (dt, *J* = 2.0, 4.2 Hz, 2H), 6.97 (d, *J* = 1.8 Hz, 1H), 6.95–6.86 (m, 5H), 6.79 (d, *J* = 16.2 Hz, 1H), 6.00 (s, 2H), 5.49–5.42 (m, 2H), 5.11–5.06 (m, 1H), 5.05 (d, *J* = 7.6 Hz, 1H), 4.22–4.16 (m, 1H), 4.15–4.08 (m, 2H), 3.91 (s, 3H), 3.89 (s, 3H), 2.16 (s, 3H), 2.02 (s, 3H), 2.02 (s, 3H), 2.00 (s, 3H). <sup>13</sup>C-NMR (100 MHz, CDCl<sub>3</sub>) δ (ppm): 198.4, 186.8, 170.4, 170.3, 170.2, 169.4, 158.2, 149.1, 148.7, 147.8, 146.9, 146.8, 145.6, 139.8, 139.7, 132.3, 128.6, 127.3, 126.6, 125.3, 124.2, 123.8, 119.8, 117.0, 115.0, 114.9, 110.5, 110.0, 98.9, 71.2, 70.8, 68.5, 66.8, 61.3, 56.2, 56.1, 20.8, 20.7, 20.7, 20.6. HRMS (ESI-TOF) *m/z*: [M + Na]<sup>+</sup> calculated for C<sub>42</sub>H<sub>42</sub>O<sub>16</sub>: 825.2365, found 825.2355.

**(2R,3R,4S,5S,6S)-2-(acetoxymethyl)-6-(4-((E)-5-(4-hydroxy-3-methoxyphenyl)-2-((E)-3-(4-hydroxy-3-methoxyphenyl)acryloyl)-3-oxopenta-1,4-dien-1-yl)phenoxy)tetrahydro-2H-pyran-3,4,5-triyl triacetate (2a-Man)**

This compound was obtained as orange solids (0.182 g, 0.227 mmol, 40%), m.p.: 211–213 °C. <sup>1</sup>H-NMR (400 MHz, CDCl<sub>3</sub>) δ (ppm): 7.78 (s, 1H), 7.75 (d, *J* = 15.1 Hz, 1H), 7.49–7.43 (m, 3H), 7.15 (dd, *J* = 2.1, 8.5 Hz, 1H), 7.04–7.01 (m, 2H), 6.97 (d, *J* = 1.8 Hz, 1H), 6.94–6.86 (m, 6H), 6.78 (d, *J* = 16.0 Hz, 1H), 6.05 (s, 1H), 6.09 (s, 1H), 5.28–5.24 (m, 2H),

5.17–5.11 (m, 1H), 5.09 (d,  $J = 7.8$  Hz, 1H), 4.26 (dd,  $J = 5.5, 12.4$  Hz, 1H), 4.16–4.09 (m, 2H), 3.92 (s, 3H), 3.89 (s, 3H), 2.04 (s, 3H), 2.02 (s, 3H), 2.02 (s, 3H).  $^{13}\text{C-NMR}$  (100 MHz,  $\text{CDCl}_3$ )  $\delta$  (ppm): 197.7, 186.7, 170.7, 170.2, 169.4, 169.3, 156.9, 149.0, 148.7, 147.8, 146.9, 146.8, 146.0, 141.6, 139.5, 135.1, 129.9, 127.1, 126.4, 125.3, 125.0, 124.2, 123.8, 119.4, 119.3, 117.1, 114.9, 110.4, 109.9, 98.8, 72.6, 70.9, 67.9, 61.6, 60.4, 56.0, 56.0, 20.7, 20.6, 20.5, 20.5. HRMS (ESI-TOF)  $m/z$ :  $[\text{M} + \text{Na}]^+$  calculated for  $\text{C}_{42}\text{H}_{42}\text{O}_{16}$ : 825.2365, found 825.2348.

**(2R,3S,4S,5R,6S)-2-(acetoxymethyl)-6-(4-((E)-5-(4-hydroxy-3-methoxyphenyl)-2-((E)-3-(4-hydroxy-3-methoxyphenyl)acryloyl)-3-oxopenta-1,4-dien-1-yl)-2-methoxyphenoxy)tetrahydro-2H-pyran-3,4,5-triyl triacetate (3a-Gal)**

This compound was obtained as orange solids (0.274 g, 0.329 mmol, 58%), m.p.: 203–204 °C.  $^1\text{H-NMR}$  (400 MHz,  $\text{CDCl}_3$ )  $\delta$  (ppm): 7.78–7.71 (m, 2H), 7.47 (d,  $J = 16.0$  Hz, 1H), 7.15 (dd,  $J = 1.6, 8.0$  Hz, 1H), 7.06–7.00 (m, 5H), 6.98–6.86 (m, 4H), 6.78 (d,  $J = 16.0$  Hz, 1H), 5.99 (s, 1H), 6.02 (s, 1H), 5.48 (dd,  $J = 8.0, 10.3$  Hz, 1H), 5.42 (d,  $J = 3.2$  Hz, 1H), 5.07 (dd,  $J = 3.2, 10.5$  Hz, 1H), 4.92 (d,  $J = 7.8$  Hz, 1H), 4.21–4.15 (m, 2H), 4.15–4.10 (m, 2H), 3.91 (s, 3H), 3.89 (s, 3H), 3.76 (s, 3H), 2.15 (s, 3H), 2.03 (s, 3H), 2.01 (s, 3H), 2.00 (s, 3H).  $^{13}\text{C-NMR}$  (100 MHz,  $\text{CDCl}_3$ )  $\delta$  (ppm): 198.4, 186.9, 170.5, 170.3, 170.2, 169.5, 150.3, 149.2, 148.8, 147.9, 147.8, 147.0, 146.9, 145.7, 140.2, 140.0, 129.8, 127.3, 126.5, 125.1, 124.2, 124.0, 123.8, 119.7, 118.9, 115.1, 115.0, 114.3, 110.6, 110.1, 100.7, 71.1, 70.7, 68.6, 66.9, 61.3, 56.1, 56.1, 56.0, 21.1, 20.8, 20.7, 20.7. HRMS (ESI-TOF)  $m/z$ :  $[\text{M} + \text{Na}]^+$  calculated for  $\text{C}_{43}\text{H}_{43}\text{O}_{17}$ : 855.247, found 855.2452.

**(2R,3R,4S,5R,6S)-2-(acetoxymethyl)-6-(4-((E)-5-(4-hydroxy-3-methoxyphenyl)-2-((E)-3-(4-hydroxy-3-methoxyphenyl)acryloyl)-3-oxopenta-1,4-dien-1-yl)-2-methoxyphenoxy)tetrahydro-2H-pyran-3,4,5-triyl triacetate (3a-Glc)**

This compound was obtained as orange solids (0.312 g, 0.442 mmol, 66%), m.p.: 204–206 °C.  $^1\text{H-NMR}$  (400 MHz,  $\text{CDCl}_3$ )  $\delta$  (ppm): 7.78–7.71 (m, 2H), 7.46 (d,  $J = 16.0$  Hz, 1H), 7.15 (dd,  $J = 1.8, 8.7$  Hz, 1H), 7.05–7.00 (m, 5H), 6.96–6.86 (m, 5H), 6.77 (d,  $J = 16.0$  Hz, 1H), 6.06 (s, 1H), 6.09 (s, 1H), 5.23–5.27 (m, 2H), 5.13 (t,  $J = 9.6$  Hz, 1H), 4.99–4.94 (m, 1H), 4.24 (dd,  $J = 5.0, 12.4$  Hz, 1H), 4.15–4.08 (m, 2H), 3.90 (s, 3H), 3.88 (s, 3H), 3.74 (s, 3H), 2.03 (s, 3H), 2.02 (s, 6H), 2.01 (s, 3H).  $^{13}\text{C-NMR}$  (100 MHz,  $\text{CDCl}_3$ )  $\delta$  (ppm): 198.3, 186.9, 170.7, 170.3, 169.5, 169.4, 150.4, 149.1, 148.7, 147.8, 147.7, 147.0, 146.9, 145.7, 140.3, 139.9, 129.9, 127.3, 126.5, 125.2, 124.2, 124.0, 123.8, 119.7, 119.2, 115.0, 115.0, 114.3, 110.5, 110.0, 100.1, 72.5, 72.2, 71.1, 68.3, 61.9, 56.1, 56.1, 56.1, 20.7, 20.7, 20.7, 20.7. HRMS (ESI-TOF)  $m/z$ :  $[\text{M} + \text{Na}]^+$  calculated for  $\text{C}_{43}\text{H}_{43}\text{O}_{17}$ : 855.247, found 855.2486.

**(2R,3R,4S,5S,6S)-2-(acetoxymethyl)-6-(4-((E)-5-(4-hydroxy-3-methoxyphenyl)-2-((E)-3-(4-hydroxy-3-methoxyphenyl)acryloyl)-3-oxopenta-1,4-dien-1-yl)-2-methoxyphenoxy)tetrahydro-2H-pyran-3,4,5-triyl triacetate (3a-Man)**

This compound was obtained as orange solids (0.109 g, 0.130 mmol, 23%), m.p.: 203–204 °C.  $^1\text{H-NMR}$  (400 MHz,  $\text{CDCl}_3$ )  $\delta$  (ppm): 7.78–7.70 (m, 2H), 7.45 (d,  $J = 16.0$  Hz, 1H), 7.14 (dd,  $J = 1.8, 8.2$  Hz, 1H), 7.07–6.83 (m, 10H), 6.76 (d,  $J = 16.0$  Hz, 1H), 6.11 (br. s., 2H), 5.69–5.66 (m, 1H), 5.35–5.23 (m, 1H), 5.16 (d,  $J = 1.4$  Hz, 1H), 5.10 (dd,  $J = 3.2, 9.6$  Hz, 1H), 4.28 (dd,  $J = 6.0, 12.4$  Hz, 1H), 4.14–4.08 (m, 2H), 3.89 (s, 3H), 3.86 (s, 3H), 3.74 (s, 3H), 2.19 (s, 3H), 2.04 (s, 3H), 2.00 (s, 3H), 2.00 (s, 3H).  $^{13}\text{C-NMR}$  (100 MHz,  $\text{CDCl}_3$ )  $\delta$  (ppm): 198.4, 186.9, 170.7, 170.4, 170.1, 169.7, 150.4, 149.1, 148.7, 147.7, 147.3, 147.0, 146.9, 145.7, 140.2, 139.9, 129.8, 127.3, 126.5, 125.1, 124.2, 123.9, 123.8, 119.7, 119.0, 115.0, 115.0, 114.3, 110.5, 110.0, 97.3, 72.7, 70.8, 68.6, 66.0, 62.5, 56.1, 56.1, 56.0, 20.9, 20.8, 20.8, 20.7. HRMS (ESI-TOF)  $m/z$ :  $[\text{M} + \text{H}]^+$  calculated for  $\text{C}_{43}\text{H}_{43}\text{O}_{17}$ : 833.2651, found 833.2651.

**(2R,3S,4S,5R,6S)-2-(acetoxymethyl)-6-(3-((E)-5-(4-hydroxy-3-methoxyphenyl)-2-((E)-3-(4-hydroxy-3-methoxyphenyl)acryloyl)-3-oxopenta-1,4-dien-1-yl)phenoxy)tetrahydro-2H-pyran-3,4,5-triyl triacetate (4a-Gal)**

This compound was obtained as orange solids (0.332 g, 0.414 mmol, 73%), m.p.: 200–201 °C.  $^1\text{H-NMR}$  (400 MHz,  $\text{CDCl}_3$ )  $\delta$  (ppm): 7.77 (s, 1H), 7.74 (d,  $J = 15.6$  Hz, 1H), 7.43 (d,  $J = 16.0$  Hz, 1H), 7.23 (d,  $J = 8.2$  Hz, 1H), 7.20–7.11 (m, 3H), 7.02–6.84 (m, 8H), 6.76 (d,  $J = 16.0$  Hz, 1H), 6.23 (d,  $J = 6.9$  Hz, 2H), 5.47–5.40 (m, 2H), 5.06 (dd,  $J = 3.2, 10.5$  Hz, 1H), 4.94 (d,  $J = 8.2$  Hz, 1H), 4.20 (dq,  $J = 6.9, 11.1$  Hz, 1H), 4.10 (q,  $J = 7.3$  Hz, 3H), 3.89 (s, 3H), 3.87 (s, 3H), 2.03 (s, 3H), 2.02 (s, 3H), 2.02 (s, 3H), 1.99 (s, 3H).  $^{13}\text{C-NMR}$  (100 MHz,  $\text{CDCl}_3$ )  $\delta$  (ppm): 197.8, 186.9, 170.5, 170.3, 170.2, 169.5, 157.1, 149.2, 148.8, 147.8, 147.0, 146.0, 141.7, 139.6, 135.3, 130.1, 127.2, 126.5, 125.3, 125.1, 124.3, 123.9, 119.6, 119.3, 117.8, 115.0, 110.5, 110.1, 99.7, 71.2, 70.8, 68.6, 66.9, 61.2, 60.5, 56.1, 56.0, 21.1, 20.8, 20.7, 20.7. HRMS (ESI-TOF)  $m/z$ :  $[\text{M} + \text{Na}]^+$  calculated for  $\text{C}_{42}\text{H}_{42}\text{O}_{16}$ : 825.2365, found 825.2362.

**(2R,3R,4S,5R,6S)-2-(acetoxymethyl)-6-(3-((E)-5-(4-hydroxy-3-methoxyphenyl)-2-((E)-3-(4-hydroxy-3-methoxyphenyl)acryloyl)-3-oxopenta-1,4-dien-1-yl)phenoxy)tetrahydro-2H-pyran-3,4,5-triyl triacetate (4a-Glc)**

This compound was obtained as orange solids (0.360 g, 0.448 mmol, 79%), m.p.: 201–203 °C.  $^1\text{H-NMR}$  (400 MHz,  $\text{CDCl}_3$ )  $\delta$  (ppm): 7.79 (s, 1H), 7.76 (d,  $J = 15.1$  Hz, 1H), 7.44 (d,  $J = 16.0$  Hz, 1H), 7.25–7.12 (m, 3H), 7.07–6.84 (m, 5H),

6.77 (d,  $J = 16.0$  Hz, 1H), 6.01 (br. s., 2H), 5.26–5.22 (m, 2H), 5.21–5.14 (m, 1H), 5.00–4.96 (m, 1H), 4.26 (t,  $J = 3.2$  Hz, 2H), 4.12 (q,  $J = 6.9$  Hz, 2H), 3.93 (s, 3H), 3.91 (s, 3H), 2.06 (s, 3H), 2.05 (s, 3H), 2.04 (s, 3H), 2.03 (s, 3H).  $^{13}\text{C-NMR}$  (100 MHz,  $\text{CDCl}_3$ )  $\delta$  (ppm): 197.9, 186.8, 170.8, 170.4, 169.5, 169.4, 157.0, 149.2, 148.8, 147.9, 147.0, 146.9, 146.1, 141.7, 139.7, 135.3, 130.1, 127.2, 126.5, 125.4, 125.2, 124.3, 123.9, 119.6, 119.4, 117.2, 115.0, 110.5, 110.0, 99.0, 72.8, 72.2, 71.0, 68.1, 61.7, 56.2, 56.1, 20.8, 20.7, 20.7, 20.7. HRMS (ESI-TOF)  $m/z$ :  $[\text{M} + \text{Na}]^+$  calculated for  $\text{C}_{42}\text{H}_{42}\text{O}_{16}$ : 825.2365, found 825.2373.

**(3a*S*,5*R*,6*R*,7*S*,7a*S*)-5-(acetoxymethyl)-2-(3-((*E*)-5-(4-hydroxy-3-methoxyphenyl)-2-((*E*)-3-(4-hydroxy-3-methoxyphenyl)acryloyl)-3-oxopenta-1,4-dien-1-yl)phenoxy)-2-methyltetrahydro-5*H*-[1,3]dioxolo[4,5-*b*]pyran-6,7-diyl diacetate (4a-Man)**

This compound was obtained as orange solids (0.118 g, 0.147 mmol, 26%), m.p.: 192–193 °C.  $^1\text{H-NMR}$  (400 MHz,  $\text{CDCl}_3$ )  $\delta$  (ppm): 7.76 (t,  $J = 7.8$  Hz, 2H), 7.42 (d,  $J = 16.5$  Hz, 1H), 7.25 (s, 1H), 7.24–7.20 (m, 1H), 7.16 (dd,  $J = 1.8, 8.2$  Hz, 1H), 7.09–6.85 (m, 9H), 6.78 (d,  $J = 16.0$  Hz, 1H), 5.96 (d,  $J = 6.0$  Hz, 2H), 5.24 (t,  $J = 9.6$  Hz, 1H), 5.21 (d,  $J = 2.3$  Hz, 1H), 4.93 (dd,  $J = 3.9, 9.9$  Hz, 1H), 4.23–4.16 (m, 1H), 4.16–4.08 (m, 3H), 4.05 (dd,  $J = 2.5, 3.9$  Hz, 1H), 3.93 (s, 3H), 3.90 (s, 3H), 2.13 (s, 3H), 2.07 (s, 3H), 2.04 (s, 3H), 1.61 (s, 3H).  $^{13}\text{C-NMR}$  (100 MHz,  $\text{CDCl}_3$ )  $\delta$  (ppm): 197.8, 186.9, 170.8, 170.2, 169.6, 152.7, 149.0, 148.7, 147.7, 146.9, 146.8, 145.9, 141.4, 139.6, 134.8, 129.6, 127.3, 126.9, 126.7, 125.5, 125.0, 124.6, 124.5, 124.2, 123.9, 119.7, 114.9, 110.4, 110.0, 97.3, 76.0, 71.5, 65.5, 62.5, 60.5, 56.2, 56.1, 24.6, 20.8, 20.8, 20.8. HRMS (ESI)  $m/z$ :  $[\text{M} + \text{Na}]^+$  calculated for  $\text{C}_{42}\text{H}_{42}\text{O}_{16}$ : 825.2365, found 825.2375.

#### 1.4 Deacetylated glycoside derivatives

**1,7-bis(4-hydroxy-3-methoxyphenyl)-4-(4-(((2*S*,3*R*,4*S*,5*R*,6*R*)-3,4,5-trihydroxy-6-(hydroxymethyl)tetrahydro-2*H*-pyran-2-yl)oxy)benzylidene)hepta-1,6-diene-3,5-dione (2b-Gal)**

This compound was obtained as dark brown solids (0.0892 g, 0.141 mmol, 89%), m.p.: 221–223 °C.  $^1\text{H-NMR}$  (400 MHz,  $\text{CD}_3\text{OD}$ )  $\delta$  (ppm): 7.85 (s, 1H), 7.68 (d,  $J = 15.1$  Hz, 1H), 7.50 (d,  $J = 8.7$  Hz, 2H), 7.46 (d,  $J = 16.0$  Hz, 1H), 7.19–7.07 (m, 3H), 7.04 (d,  $J = 8.7$  Hz, 2H), 7.03–7.00 (m, 1H), 6.95 (dd,  $J = 1.8, 8.2$  Hz, 1H), 6.71 (s, 1H), 6.68 (d,  $J = 6.9$  Hz, 1H), 6.60 (d,  $J = 8.2$  Hz, 1H), 3.85 (d,  $J = 2.3$  Hz, 1H), 3.83 (s, 3H), 3.77 (s, 3H), 3.70 (d,  $J = 5.5$  Hz, 1H), 3.65 (d,  $J = 5.0$  Hz, 2H), 3.62 (d,  $J = 5.5$  Hz, 1H), 3.41 (d,  $J = 2.8$  Hz, 2H).  $^{13}\text{C-NMR}$  (100 MHz,  $\text{CD}_3\text{OD}$ )  $\delta$  (ppm): 199.4, 188.3, 159.4, 149.8, 149.1, 147.7, 146.7, 146.6, 146.5, 145.9, 139.2, 139.1, 132.0, 128.3, 127.9, 126.9, 126.3, 125.1, 124.3, 120.2, 116.7, 114.4, 114.3, 110.4, 110.0, 100.3, 76.9, 76.5, 73.5, 69.9, 61.0, 54.9, 54.7. HRMS (ESI-TOF)  $m/z$ :  $[\text{M} + \text{Na}]^+$  calculated for  $\text{C}_{34}\text{H}_{34}\text{O}_{12}$ : 657.1942, found 657.1951.

**1,7-bis(4-hydroxy-3-methoxyphenyl)-4-(4-(((2*S*,3*R*,4*S*,5*S*,6*R*)-3,4,5-trihydroxy-6-(hydroxymethyl)tetrahydro-2*H*-pyran-2-yl)oxy)benzylidene)hepta-1,6-diene-3,5-dione (2b-Glc)**

This compound was obtained as dark brown solids (0.0862 g, 0.136 mmol, 86%), m.p.: 221–223 °C.  $^1\text{H-NMR}$  (400 MHz,  $\text{CD}_3\text{OD}$ )  $\delta$  (ppm): 7.88 (s, 1H), 7.68 (d,  $J = 15.6$  Hz, 1H), 7.53–7.43 (m, 4H), 7.17–7.23 (m, 2H), 7.13–7.09 (m, 1H), 7.07–7.03 (m, 3H), 6.96 (dd,  $J = 1.6, 8.5$  Hz, 1H), 6.74–6.69 (m, 2H), 6.64 (d,  $J = 8.2$  Hz, 1H), 3.86 (d,  $J = 3.2$  Hz, 1H), 3.84 (s, 3H), 3.78 (s, 3H), 3.77–3.71 (m, 2H), 3.70 (d,  $J = 3.2$  Hz, 2H), 3.67–3.64 (m, 1H), 3.54 (dd,  $J = 3.2, 9.6$  Hz, 1H).  $^{13}\text{C-NMR}$  (100 MHz,  $\text{CD}_3\text{OD}$ )  $\delta$  (ppm): 199.4, 188.4, 159.5, 149.5, 148.7, 147.8, 146.2, 146.1, 145.1, 139.7, 139.5, 132.0, 127.7, 127.2, 126.1, 125.0, 124.1, 123.7, 119.5, 116.5, 114.1, 114.1, 110.6, 110.2, 101.0, 75.7, 73.4, 70.8, 68.9, 61.1, 55.0, 54.8. HRMS (ESI-TOF)  $m/z$ :  $[\text{M} + \text{Na}]^+$  calculated for  $\text{C}_{34}\text{H}_{34}\text{O}_{12}$ : 657.1942, found 657.1946.

**1,7-bis(4-hydroxy-3-methoxyphenyl)-4-(4-(((2*S*,3*S*,4*S*,5*S*,6*R*)-3,4,5-trihydroxy-6-(hydroxymethyl)tetrahydro-2*H*-pyran-2-yl)oxy)benzylidene)hepta-1,6-diene-3,5-dione (2b-Man)**

This compound was obtained as dark brown solids (0.0762 g, 0.120 mmol, 76%), m.p.: 222–223 °C.  $^1\text{H-NMR}$  (400 MHz,  $\text{CD}_3\text{OD}$ )  $\delta$  (ppm): 7.90 (s, 1H), 7.68 (s, 1H), 7.72 (s, 1H), 7.54–7.46 (m, 5H), 7.25–7.20 (m, 3H), 7.16–7.12 (m, 2H), 7.10–7.05 (m, 5H), 6.98 (dd,  $J = 1.6, 8.5$  Hz, 2H), 6.77 (s, 2H), 6.74 (d,  $J = 8.7$  Hz, 2H), 6.67 (d,  $J = 8.2$  Hz, 2H), 4.03–4.00 (dd,  $J = 1.0, 8.2$  Hz, 1H), 3.84 (d,  $J = 6.9$  Hz, 1H), 3.80 (s, 3H), 3.78 (s, 4H), 3.76–3.70 (m, 2H), 3.70–3.65 (m, 1H), 3.62 (t,  $J = 1.0$  Hz, 1H), 3.52 (dd,  $J = 2.3, 9.2$  Hz, 1H).  $^{13}\text{C-NMR}$  (100 MHz,  $\text{CD}_3\text{OD}$ )  $\delta$  (ppm): 196.4, 188.8, 160.3, 150.2, 149.8, 148.1, 146.8, 146.5, 145.1, 140.6, 137.8, 132.7, 129.6, 126.9, 126.2, 125.2, 124.9, 124.3, 123.9, 120.5, 120.1, 118.3, 115.3, 110.9, 110.8, 99.9, 72.7, 70.9, 69.2, 61.4, 60.4, 55.2, 55.1. HRMS (ESI-TOF)  $m/z$ :  $[\text{M} + \text{Na}]^+$  calculated for  $\text{C}_{34}\text{H}_{34}\text{O}_{12}$ : 657.1942, found 657.1928.

**1,7-bis(4-hydroxy-3-methoxyphenyl)-4-(3-methoxy-4-(((2*S*,3*R*,4*S*,5*R*,6*R*)-3,4,5-trihydroxy-6-(hydroxymethyl)tetrahydro-2*H*-pyran-2-yl)oxy)benzylidene)hepta-1,6-diene-3,5-dione (3b-Gal)**

This compound was obtained as dark brown solids (0.104 g, 0.156 mmol, 99%), m.p.: 219–221 °C. <sup>1</sup>H-NMR (400 MHz, CD<sub>3</sub>OD) δ (ppm): 7.94 (s, 1H), 7.66 (d, *J* = 15.6 Hz, 1H), 7.49 (d, *J* = 16.0 Hz, 1H), 7.34 (d, *J* = 15.1 Hz, 1H), 7.29–7.27 (m, 1H), 7.18–7.12 (m, 5H), 7.02 (dd, *J* = 1.8, 8.2 Hz, 1H), 6.85–6.79 (m, 2H), 6.75 (d, *J* = 8.2 Hz, 1H), 3.89 (s, 3H), 3.85 (dd, *J* = 4.1, 7.8 Hz, 2H), 3.82 (s, 4H), 3.79 (d, *J* = 1.8 Hz, 1H), 3.76 (s, 3H), 3.71–3.68 (m, 2H), 3.66–3.61 (m, 1H), 3.55–3.51 (m, 1H). <sup>13</sup>C-NMR (100 MHz, CD<sub>3</sub>OD) δ (ppm): 188.7, 168.7, 150.4, 149.9, 149.3, 148.9, 148.5, 148.1, 148.1, 145.5, 140.5, 139.7, 128.0, 126.8, 126.1, 124.5, 124.1, 123.9, 123.7, 118.1, 115.8, 115.3, 115.3, 113.8, 111.0, 110.8, 101.3, 75.8, 73.4, 70.7, 68.8, 61.0, 55.3, 55.2, 55.1. HRMS (ESI-TOF) *m/z*: [M + Na]<sup>+</sup> calculated for C<sub>35</sub>H<sub>36</sub>O<sub>13</sub>: 687.2048, found 687.2046.

**1,7-bis(4-hydroxy-3-methoxyphenyl)-4-(3-methoxy-4-(((2S,3R,4S,5S,6R)-3,4,5-trihydroxy-6-(hydroxymethyl)tetrahydro-2H-pyran-2-yl)oxy)benzylidene)hepta-1,6-diene-3,5-dione (3b-Glc)**

This compound was obtained as dark brown solids (0.0798 g, 0.120 mmol, 76%), m.p.: 219–220 °C. <sup>1</sup>H-NMR (400 MHz, CD<sub>3</sub>OD) δ (ppm): 7.94 (s, 1H), 7.66 (d, *J* = 13.7 Hz, 1H), 7.49 (d, *J* = 15.6 Hz, 1H), 7.40–7.22 (m, 2H), 7.22–7.07 (m, 5H), 7.02 (d, *J* = 7.3 Hz, 1H), 6.85–6.73 (m, 4H), 3.89 (s, 3H), 3.87–3.84 (m, 2H), 3.82 (s, 3H), 3.80–3.78 (m, 1H), 3.76 (s, 3H), 3.71–3.67 (m, 2H), 3.66–3.61 (m, 1H), 3.53 (ddd, *J* = 0.9, 3.4, 9.9 Hz, 1H). <sup>13</sup>C-NMR (100 MHz, CD<sub>3</sub>OD) δ (ppm): 199.6, 186.5, 150.5, 149.9, 149.3, 148.9, 148.5, 148.2, 148.1, 145.5, 140.2, 139.7, 130.2, 128.0, 126.8, 126.0, 124.1, 123.9, 123.7, 118.9, 118.1, 115.3, 115.3, 115.3, 113.8, 111.0, 110.8, 101.3, 75.8, 73.4, 70.7, 68.8, 61.0, 55.3, 55.2, 55.1. HRMS (ESI-TOF) *m/z*: [M + Na]<sup>+</sup> calculated for C<sub>35</sub>H<sub>36</sub>O<sub>13</sub>: 687.2048, found 687.2041.

**1,7-bis(4-hydroxy-3-methoxyphenyl)-4-(3-methoxy-4-(((2S,3S,4S,5S,6R)-3,4,5-trihydroxy-6-(hydroxymethyl)tetrahydro-2H-pyran-2-yl)oxy)benzylidene)hepta-1,6-diene-3,5-dione (3b-Man)**

This compound was obtained as dark brown solids (0.0977 g, 0.147 mmol, 93%), m.p.: 220–221 °C. <sup>1</sup>H-NMR (400 MHz, CD<sub>3</sub>OD) δ (ppm): 7.95 (s, 1H), 7.68 (d, *J* = 15.6 Hz, 1H), 7.51 (d, *J* = 16.0 Hz, 1H), 7.36 (d, *J* = 15.1 Hz, 1H), 7.31–7.28 (m, 1H), 7.20–7.13 (m, 6H), 7.04 (dd, *J* = 1.8, 8.2 Hz, 1H), 6.85 (d, *J* = 11.5 Hz, 1H), 6.82 (d, *J* = 3.7 Hz, 1H), 6.77 (d, *J* = 8.2 Hz, 1H), 4.02 (dd, *J* = 1.0, 8.2 Hz, 1H), 3.85 (d, *J* = 6.9 Hz, 1H), 3.80 (s, 3H), 3.79 (s, 4H), 3.73 (s, 3H), 3.72–3.68 (m, 2H), 3.66 (t, *J* = 1.0 Hz, 1H), 3.65–3.59 (m, 1H), 3.53 (dd, *J* = 2.3, 9.2 Hz, 1H). <sup>13</sup>C-NMR (100 MHz, CD<sub>3</sub>OD) δ (ppm): 199.5, 188.6, 150.3, 149.8, 149.1, 148.5, 148.3, 148.1, 148.0, 145.5, 140.4, 139.8, 128.3, 126.8, 126.0, 124.4, 124.1, 123.9, 123.7, 118.1, 116.1, 115.3, 115.3, 113.7, 111.0, 110.8, 98.5, 77.2, 73.4, 70.9, 66.8, 61.1, 55.2, 55.1, 53.5. HRMS (ESI-TOF) *m/z*: [M + Na]<sup>+</sup> calculated for C<sub>35</sub>H<sub>36</sub>O<sub>13</sub>: 687.2048, found 687.2032.

**1,7-bis(4-hydroxy-3-methoxyphenyl)-4-(3-(((2S,3R,4S,5R,6R)-3,4,5-trihydroxy-6-(hydroxymethyl)tetrahydro-2H-pyran-2-yl)oxy)benzylidene)hepta-1,6-diene-3,5-dione (4b-Gal)**

Dark brown solids (0.0732 g, 0.115 mmol, 73%), m.p.: 212–213 °C. <sup>1</sup>H-NMR (400 MHz, CD<sub>3</sub>OD) δ (ppm): 7.95 (s, 1H), 7.67 (d, *J* = 14.2 Hz, 1H), 7.46 (d, *J* = 15.6 Hz, 1H), 7.18–7.29 (m, 2H), 7.17–7.04 (m, 4H), 7.03–6.91 (m, 3H), 6.82–6.72 (m, 3H), 3.88 (d, *J* = 2.3 Hz, 2H), 3.86 (s, 3H), 3.85–3.82 (m, 2H), 3.80 (s, 3H), 3.76–3.71 (m, 1H), 3.63 (t, *J* = 6.0 Hz, 1H), 3.52–3.48 (m, 1H). <sup>13</sup>C-NMR (100 MHz, CD<sub>3</sub>OD) δ (ppm): 199.0, 188.8, 157.9, 150.4, 150.0, 148.1, 146.8, 145.9, 141.4, 140.3, 135.1, 129.6, 126.7, 126.0, 124.1, 123.9, 118.8, 118.1, 117.2, 115.3, 110.9, 110.8, 101.4, 75.5, 73.5, 70.8, 68.8, 60.9, 55.2, 55.1. HRMS (ESI-TOF) *m/z*: [M + Na]<sup>+</sup> calculated for C<sub>34</sub>H<sub>34</sub>O<sub>12</sub>: 657.1942, found 657.1948.

**1,7-bis(4-hydroxy-3-methoxyphenyl)-4-(3-(((2S,3R,4S,5S,6R)-3,4,5-trihydroxy-6-(hydroxymethyl)tetrahydro-2H-pyran-2-yl)oxy)benzylidene)hepta-1,6-diene-3,5-dione (4b-Glc)**

Dark brown solids (0.0953 g, 0.150 mmol, 95%), m.p.: 212–214 °C. <sup>1</sup>H-NMR (400 MHz, CD<sub>3</sub>OD) δ (ppm): 7.95 (s, 1H), 7.68 (d, *J* = 15.6 Hz, 1H), 7.45 (d, *J* = 16.0 Hz, 1H), 7.35–7.24 (m, 4H), 7.20–7.11 (m, 4H), 7.08–6.99 (m, 2H), 6.81 (d, *J* = 7.3 Hz, 2H), 6.76–6.73 (m, 2H), 3.88 (s, 3H), 3.87–3.85 (m, 2H), 3.85 (d, *J* = 2.8 Hz, 1H), 3.82 (s, 3H), 3.82–3.80 (m, 1H), 3.76–3.72 (m, 1H), 3.71 (d, *J* = 2.8 Hz, 1H), 3.68 (m, 1H). <sup>13</sup>C-NMR (100 MHz, CD<sub>3</sub>OD) δ (ppm): 199.0, 188.8, 157.9, 150.4, 150.0, 148.8, 148.1, 147.7, 145.9, 141.4, 140.2, 135.1, 129.6, 126.8, 126.0, 125.4, 125.1, 124.0, 123.9, 119.5, 119.3, 118.1, 115.3, 110.9, 110.8, 100.9, 73.4, 72.9, 71.8, 69.7, 61.4, 55.2, 55.1. HRMS (ESI-TOF) *m/z*: [M + Na]<sup>+</sup> calculated for C<sub>34</sub>H<sub>34</sub>O<sub>12</sub>: 657.1942, found 657.1949.

**4-(3-(((3aS,5R,6S,7S,7aS)-6,7-dihydroxy-5-(hydroxymethyl)-2-methyltetrahydro-5H-[1,3]dioxolo[4,5-b]pyran-2-yl)oxy)benzylidene)-1,7-bis(4-hydroxy-3-methoxyphenyl)hepta-1,6-diene-3,5-dione (4b-Man)**

Dark brown solids (0.0823 g, 0.122 mmol, 77%), m.p.: 207–208 °C. <sup>1</sup>H-NMR (400 MHz, CD<sub>3</sub>OD) δ (ppm): 7.89 (s, 1H), 7.67 (d, *J* = 15.1 Hz, 1H), 7.44 (d, *J* = 16.0 Hz, 1H), 7.33–7.27 (m, 2H), 7.17–7.09 (m, 3H), 7.02–6.93 (m, 2H), 6.83–6.77 (m, 2H), 6.77–6.72 (m, 2H), 4.33 (dd, *J* = 2.3, 6.0 Hz, 1H), 3.91 (d, *J* = 7.3 Hz, 1H), 3.88 (s, 3H), 3.81 (s, 3H), 3.80–3.75 (m, 1H), 3.70–3.62 (m, 2H), 3.62–3.55 (m, 1H), 3.55–3.52 (m, 1H), 1.55 (s, 3H). <sup>13</sup>C-NMR (100 MHz, CD<sub>3</sub>OD) δ (ppm): 199.0, 188.8, 157.5, 150.3, 148.6, 148.1, 147.4, 146.6, 146.6, 145.8, 140.8, 139.7, 135.0, 129.5, 126.8, 126.2,

126.1, 124.9, 124.2, 123.9, 123.8, 123.0, 122.7, 121.6, 115.3, 110.9, 110.7, 100.0, 76.6, 70.9, 65.3, 63.8, 61.5, 55.2, 55.1, 22.8. HRMS (ESI-TOF)  $m/z$ :  $[M + Na]^+$  calculated for  $C_{34}H_{34}O_{12}$ : 657.1942, found 657.1929.

## 2. NMR spectra of the synthesised sugar-conjugated derivatives

### 2.1 Sugar-conjugated benzaldehyde intermediates

(2*R*,3*S*,4*S*,5*R*,6*S*)-2-(acetoxymethyl)-6-(4-formylphenoxy)tetrahydro-2*H*-pyran-3,4,5-triyl triacetate (**9a**)

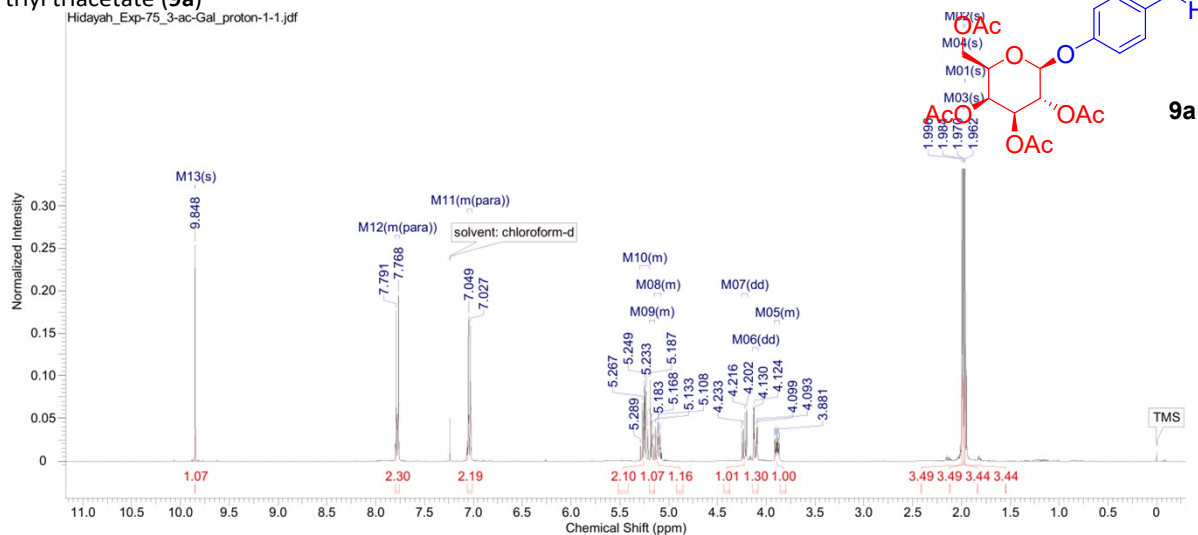

(2*R*,3*R*,4*S*,5*R*,6*S*)-2-(acetoxymethyl)-6-(4-formylphenoxy)tetrahydro-2*H*-pyran-3,4,5-triyl triacetate (**9b**)

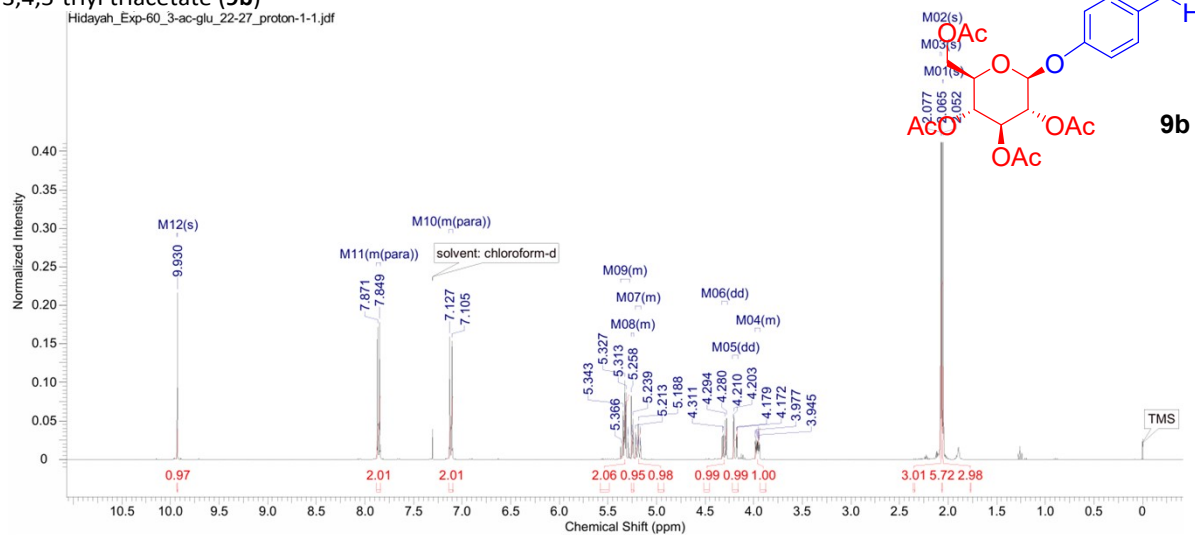

(2*R*,3*R*,4*S*,5*S*,6*S*)-2-(acetoxymethyl)-6-(4-formylphenoxy)tetrahydro-2*H*-pyran-3,4,5-triyl triacetate (**9c**)

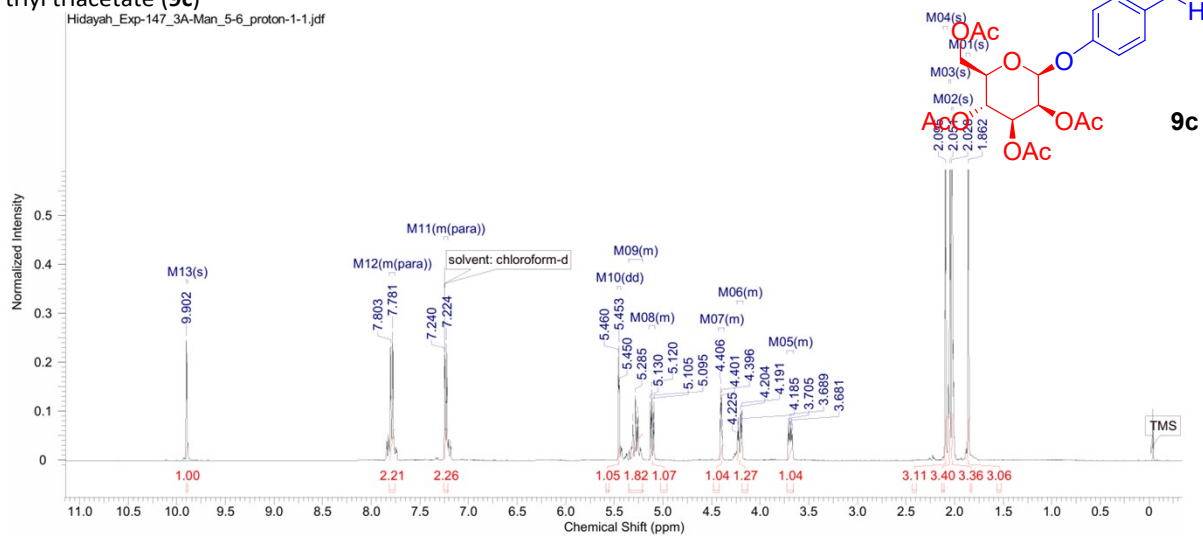

(2*R*,3*S*,4*S*,5*R*,6*S*)-2-(acetoxymethyl)-6-(4-formyl-2-methoxyphenoxy)tetrahydro-2*H*-pyran-3,4,5-triyl triacetate (**10a**)

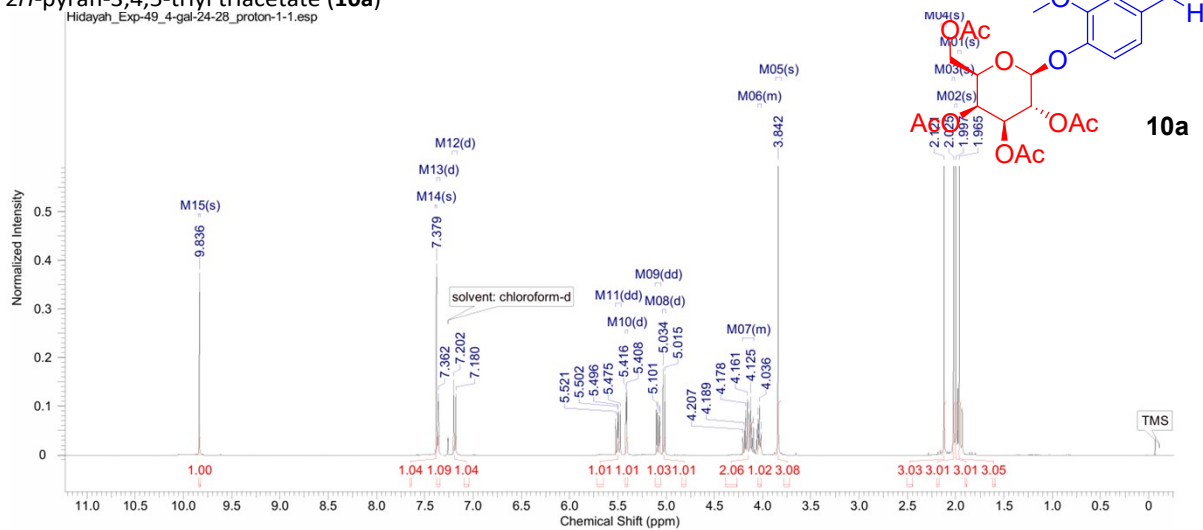

(2*R*,3*R*,4*S*,5*R*,6*S*)-2-(acetoxymethyl)-6-(4-formyl-2-methoxyphenoxy)tetrahydro-2*H*-pyran-3,4,5-triyl triacetate (**10b**)

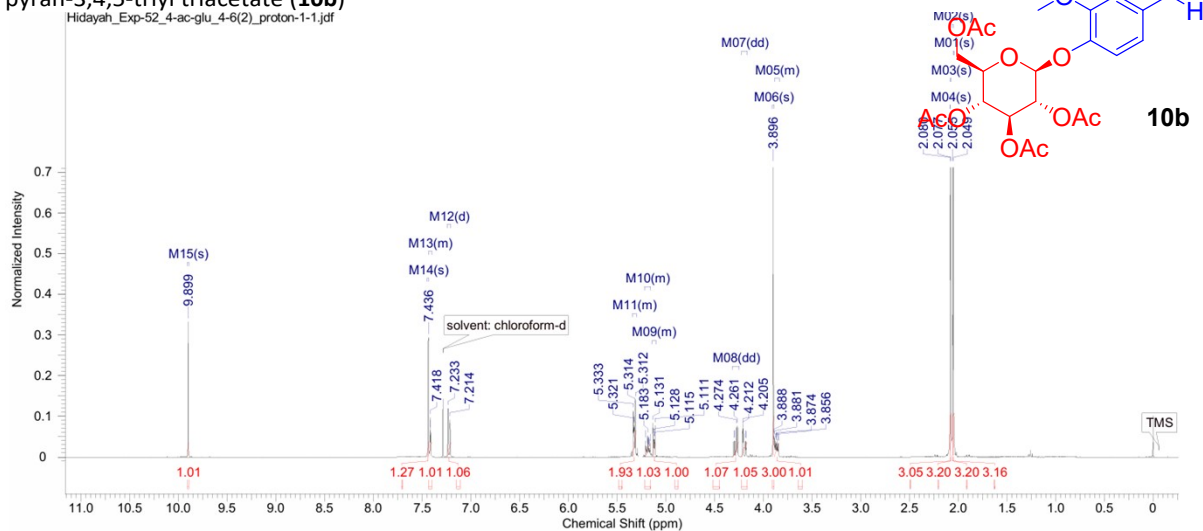

(2*R*,3*R*,4*S*,5*S*,6*S*)-2-(acetoxymethyl)-6-(4-formyl-2-methoxyphenoxy)tetrahydro-2*H*-pyran-3,4,5-triyl triacetate (**10c**)

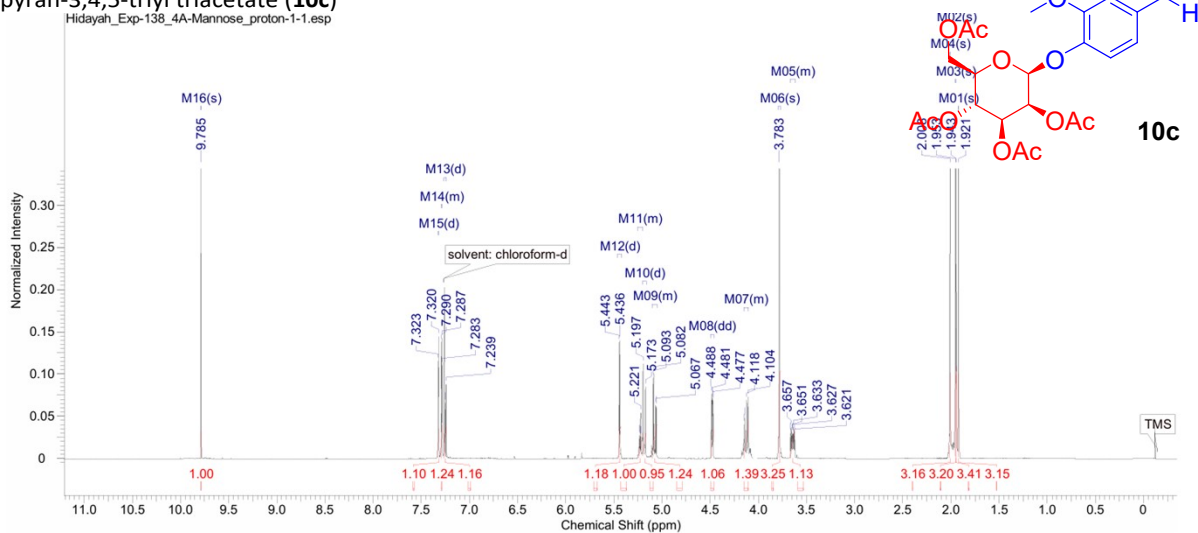

(2*R*,3*S*,4*S*,5*R*,6*S*)-2-(acetoxymethyl)-6-(3-formylphenoxy)tetrahydro-2*H*-pyran-3,4,5-triyl triacetate (**11a**)

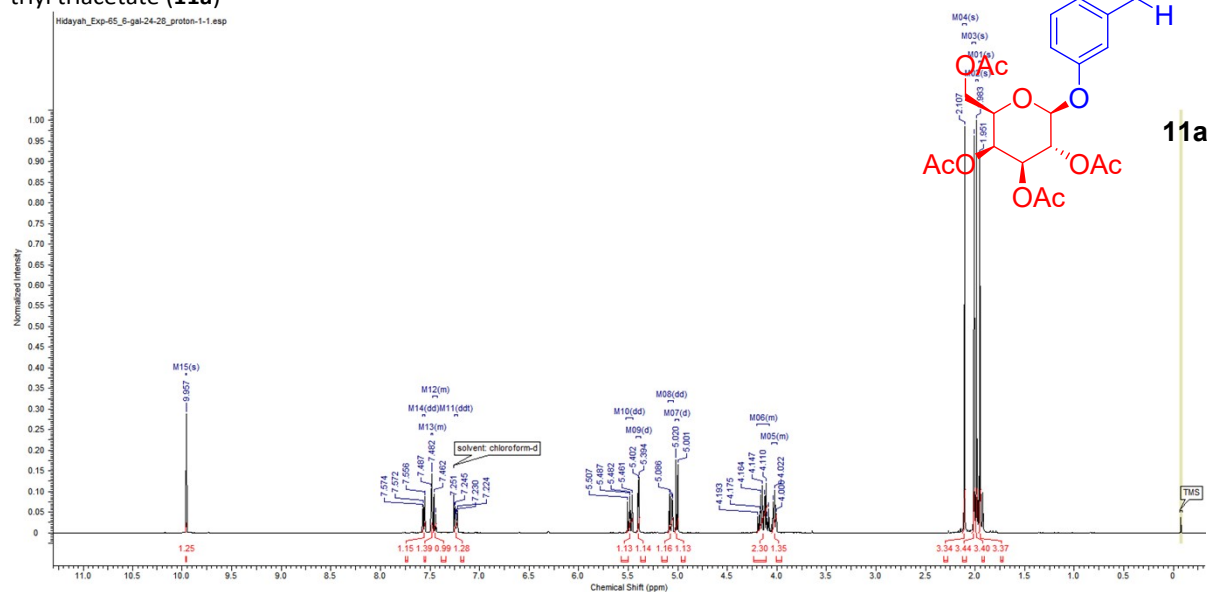

(2*R*,3*R*,4*S*,5*R*,6*S*)-2-(acetoxymethyl)-6-(3-formylphenoxy)tetrahydro-2*H*-pyran-3,4,5-triyl triacetate (**11b**)

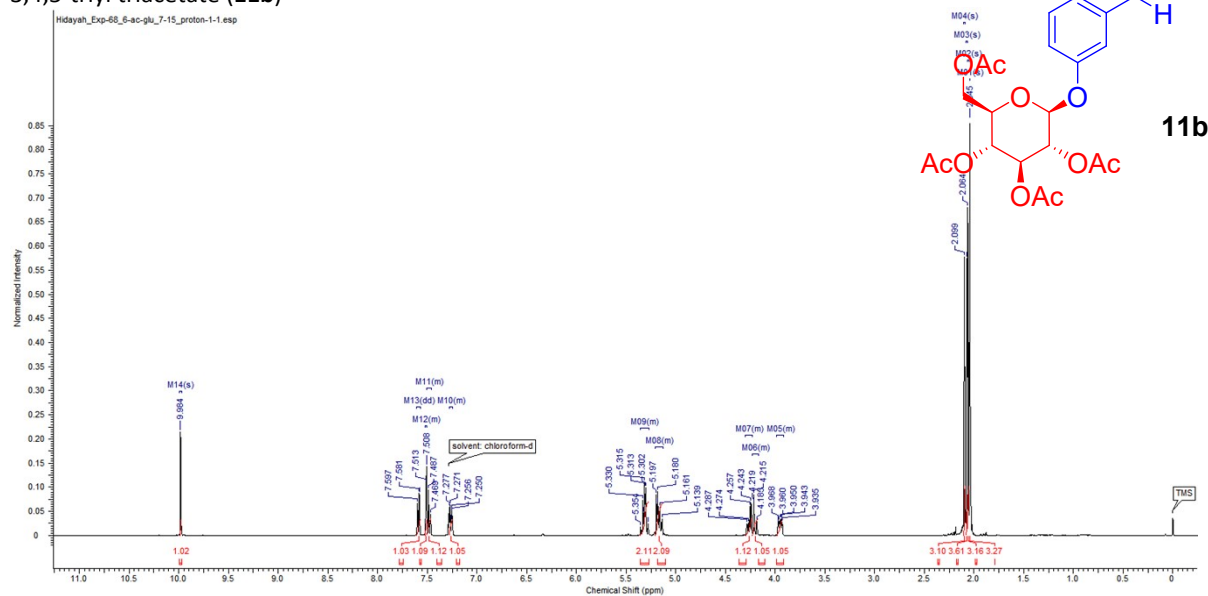

(3*aS*,5*R*,6*R*,7*S*,7*aS*)-5-(acetoxymethyl)-2-(3-formylphenoxy)-2-methyltetrahydro-5*H*-[1,3]dioxolo[4,5-*b*]pyran-6,7-diyl diacetate (**11c**)

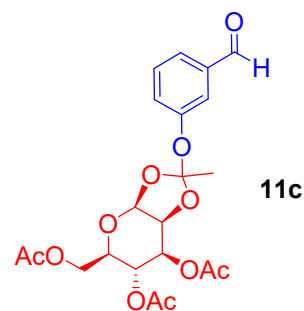

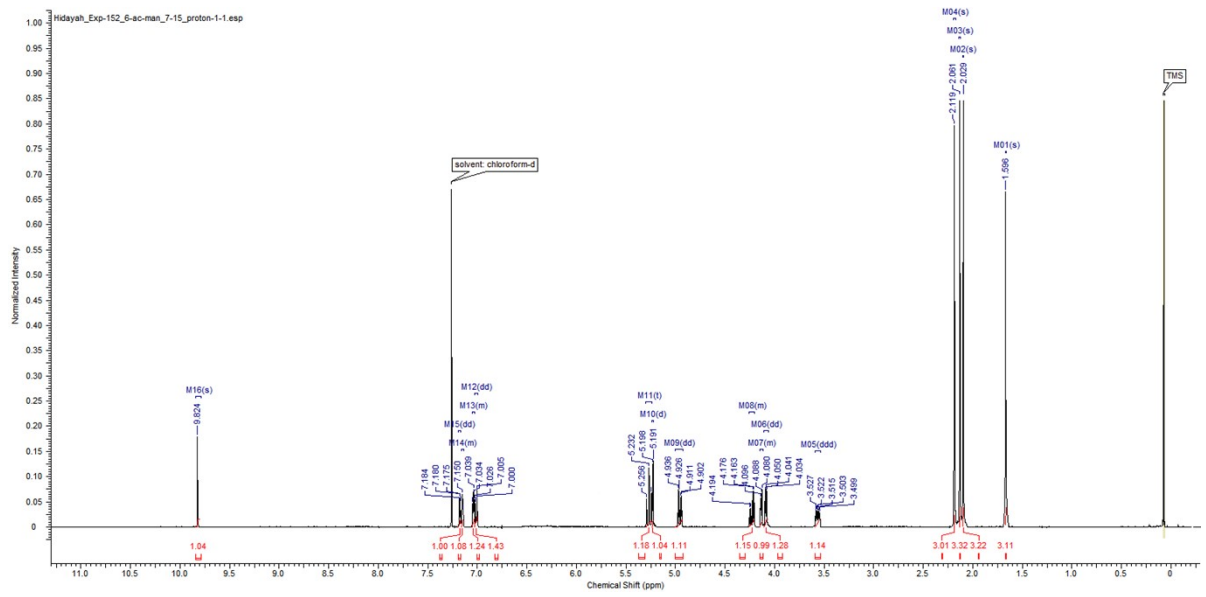

## 2.2 Acetylated glycoside derivatives

(2*R*,3*S*,4*S*,5*R*,6*S*)-2-(acetoxymethyl)-6-(4-((*E*)-5-(4-hydroxy-3-methoxyphenyl)-2-((*E*)-3-(4-hydroxy-3-methoxyphenyl)acryloyl)-3-oxopenta-1,4-dien-1-yl)phenoxy)tetrahydro-2*H*-pyran-3,4,5-triyl triacetate (**2a-Gal**)

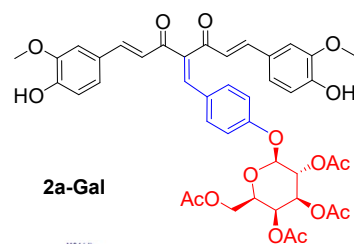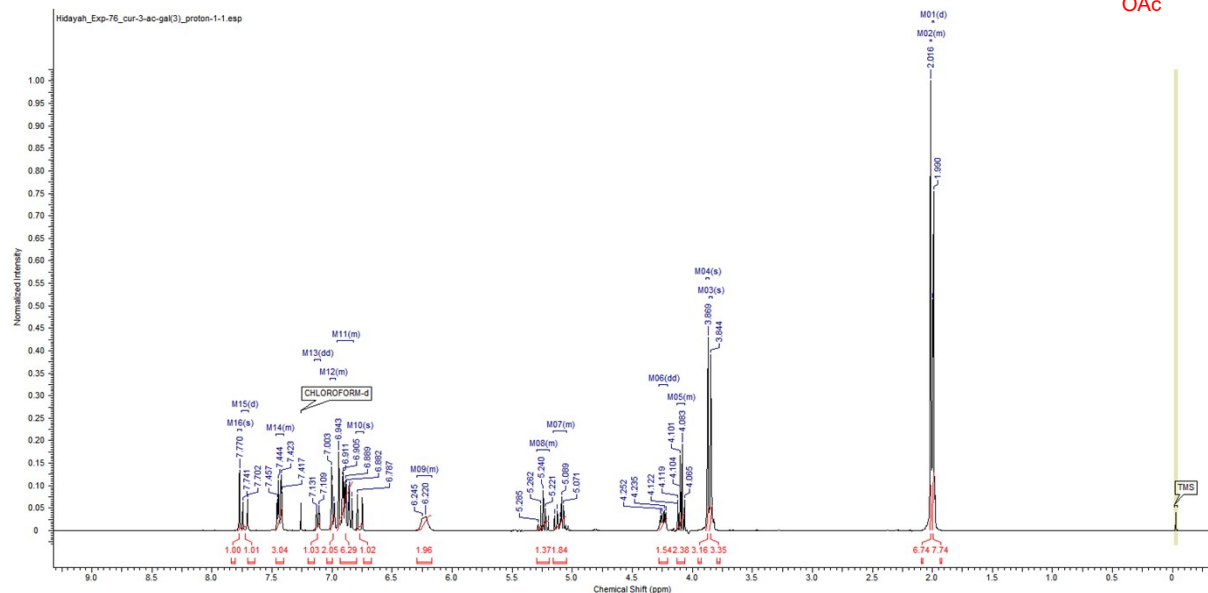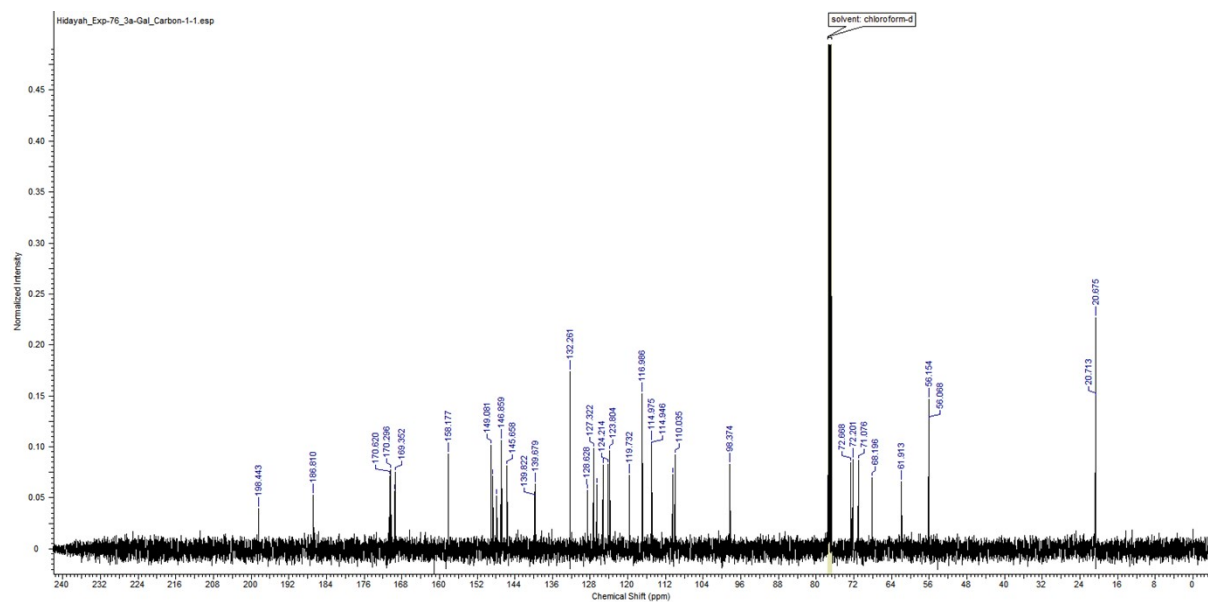

(2*R*,3*R*,4*S*,5*R*,6*S*)-2-(acetoxymethyl)-6-(4-((*E*)-5-(4-hydroxy-3-methoxyphenyl)-2-((*E*)-3-(4-hydroxy-3-methoxyphenyl)acryloyl)-3-oxopenta-1,4-dien-1-yl)phenoxy)tetrahydro-2*H*-pyran-3,4,5-triyl triacetate (**2a-Glc**)

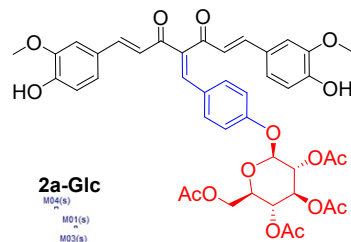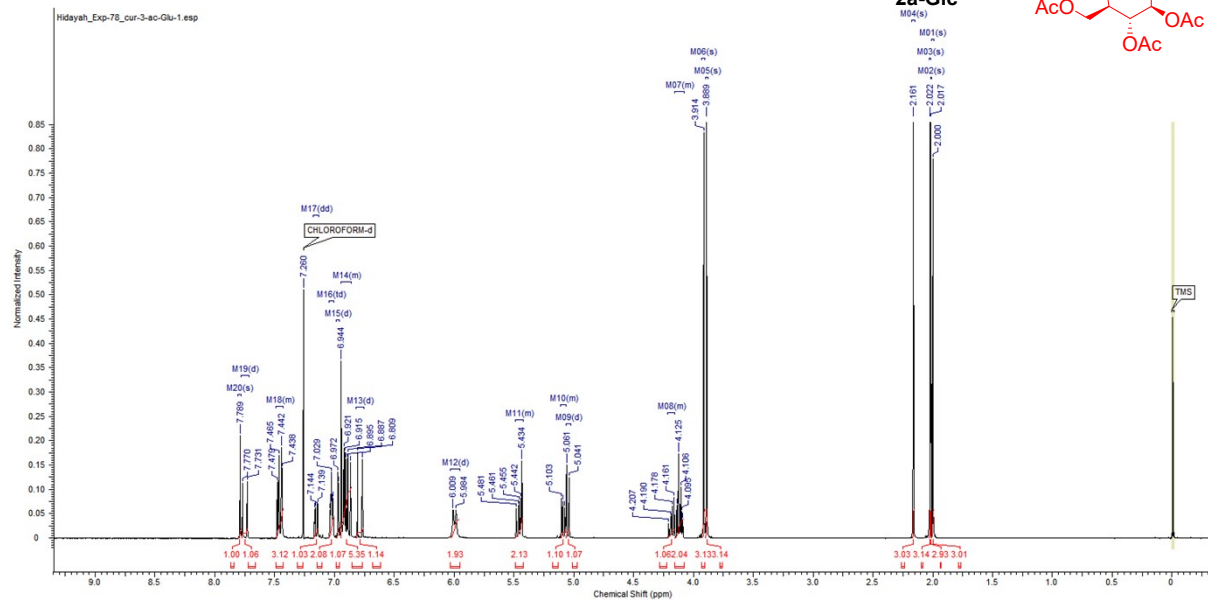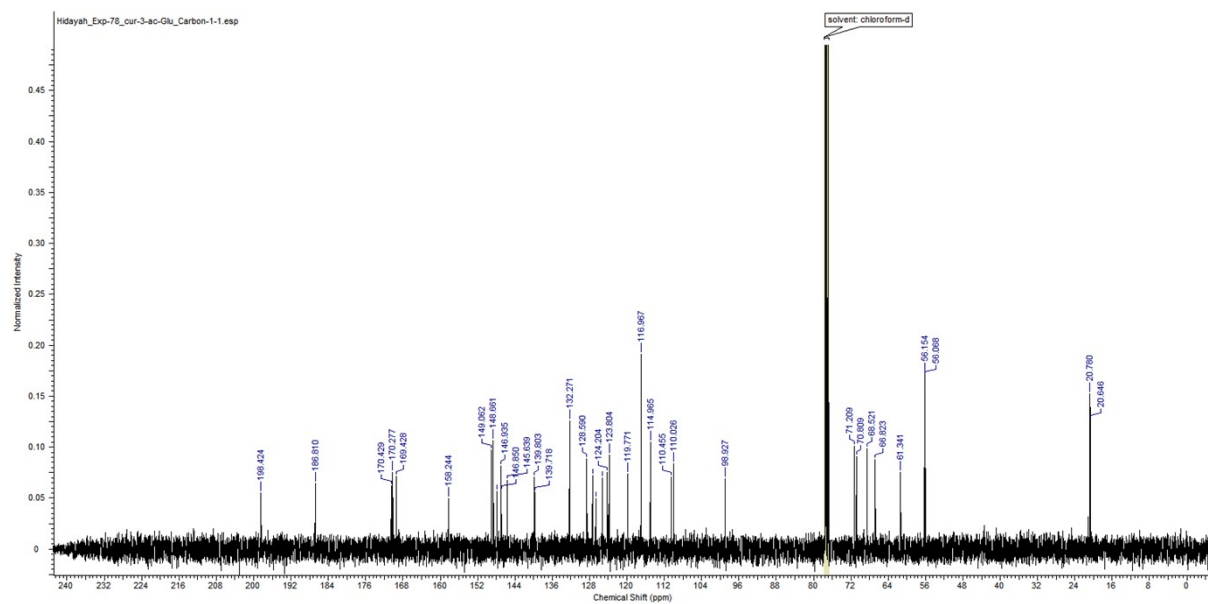

(2*R*,3*R*,4*S*,5*S*,6*S*)-2-(acetoxymethyl)-6-(4-((*E*)-5-(4-hydroxy-3-methoxyphenyl)-2-((*E*)-3-(4-hydroxy-3-methoxyphenyl)acryloyl)-3-oxopenta-1,4-dien-1-yl)phenoxy)tetrahydro-2*H*-pyran-3,4,5-triyl triacetate (**2a-Man**)

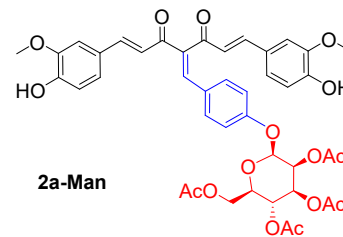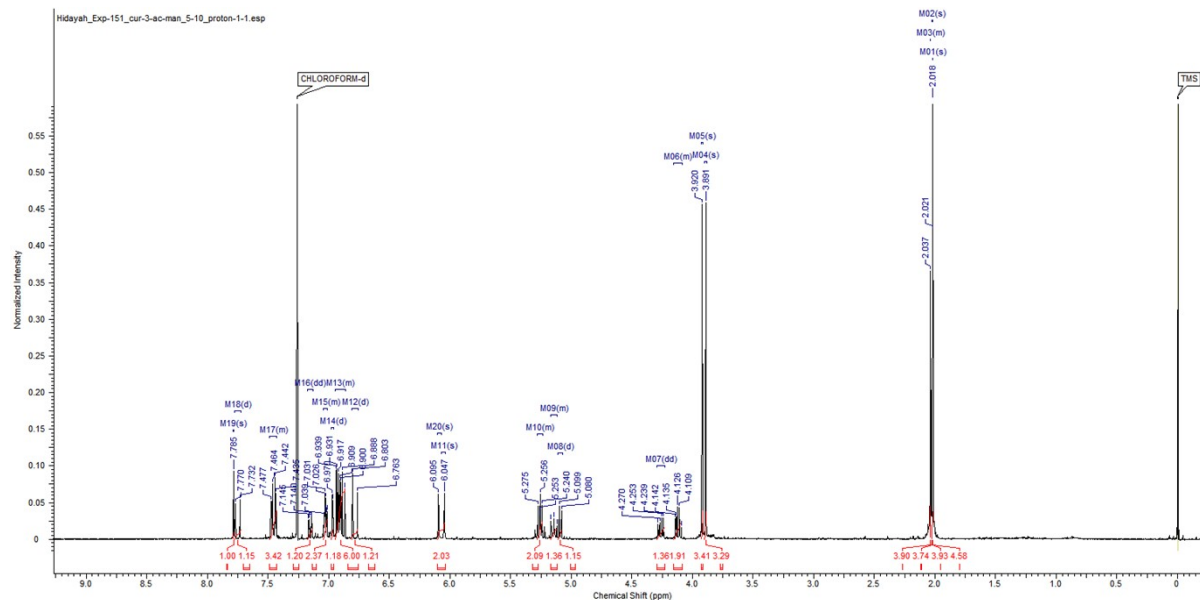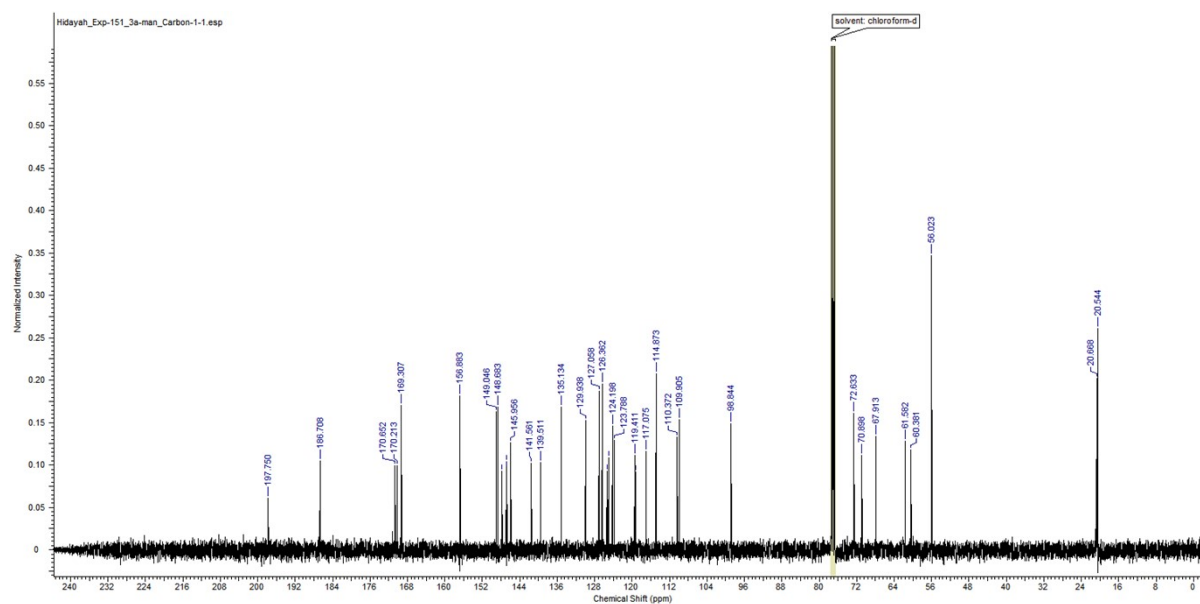

(2R,3S,4S,5R,6S)-2-(acetoxymethyl)-6-4-((E)-5-(4-hydroxy-3-methoxyphenyl)-2-((E)-3-(4-hydroxy-3-methoxyphenyl)acryloyl)-3-oxopenta-1,4-dien-1-yl)-2-methoxyphenoxy)tetrahydro-2H-pyran-3,4,5-triyl triacetate (**3a-Gal**)

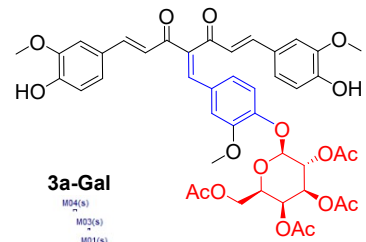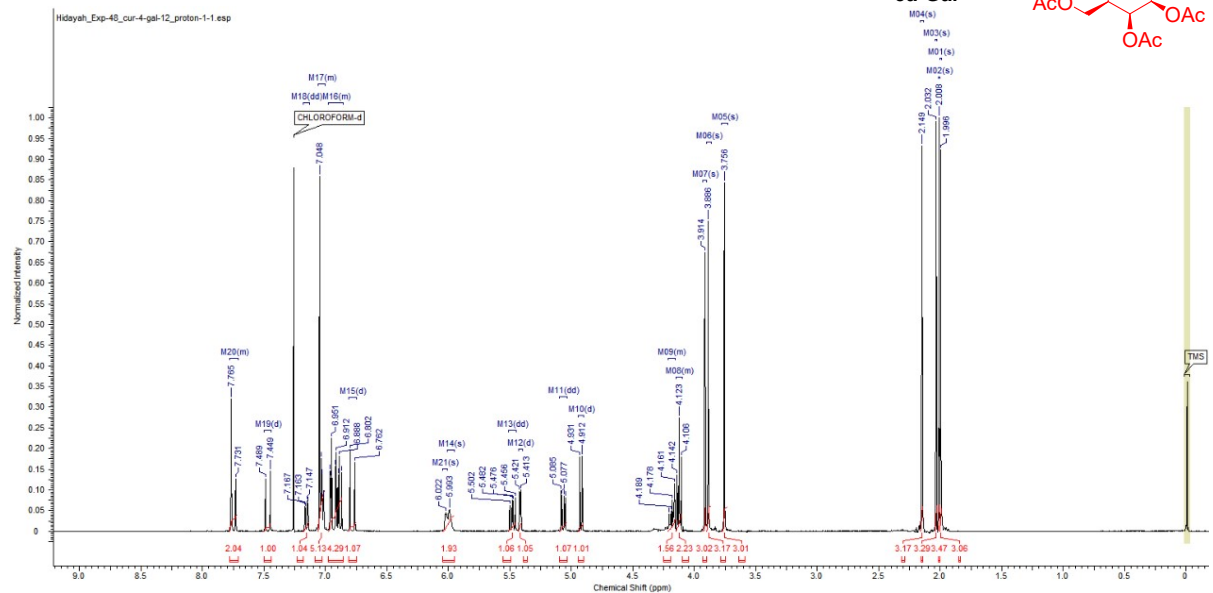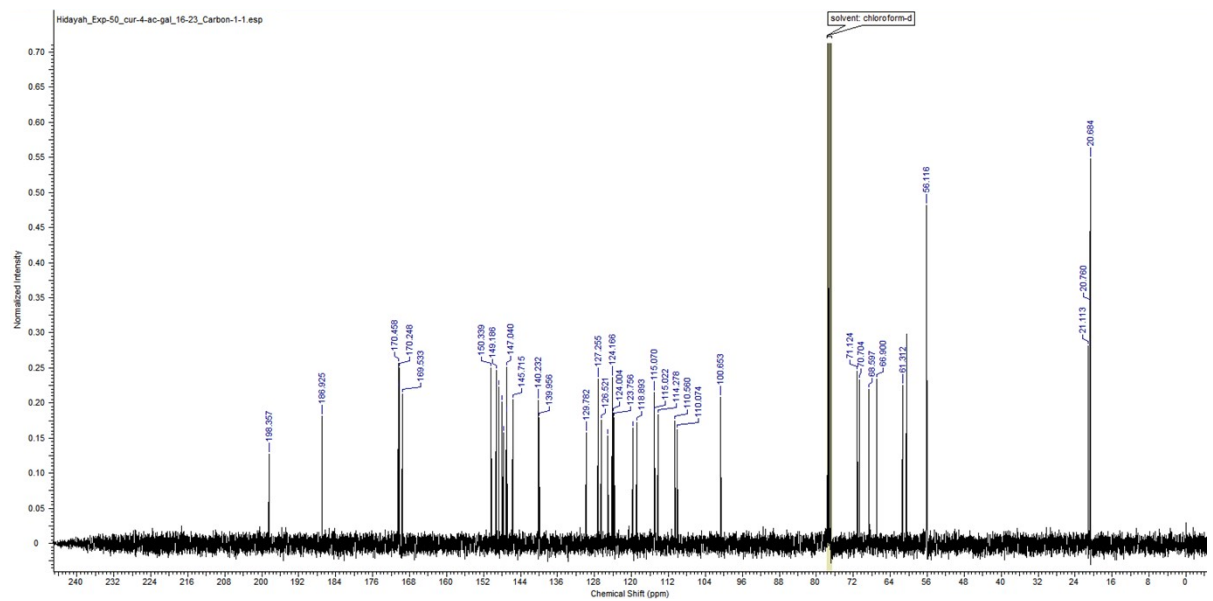

(2*R*,3*R*,4*S*,5*R*,6*S*)-2-(acetoxymethyl)-6-4-((*E*)-5-(4-hydroxy-3-methoxyphenyl)-2-((*E*)-3-(4-hydroxy-3-methoxyphenyl)acryloyl)-3-oxopenta-1,4-dien-1-yl)-2-methoxyphenoxy)tetrahydro-2*H*-pyran-3,4,5-triyl triacetate (**3a-Glc**)

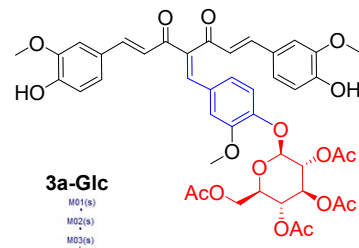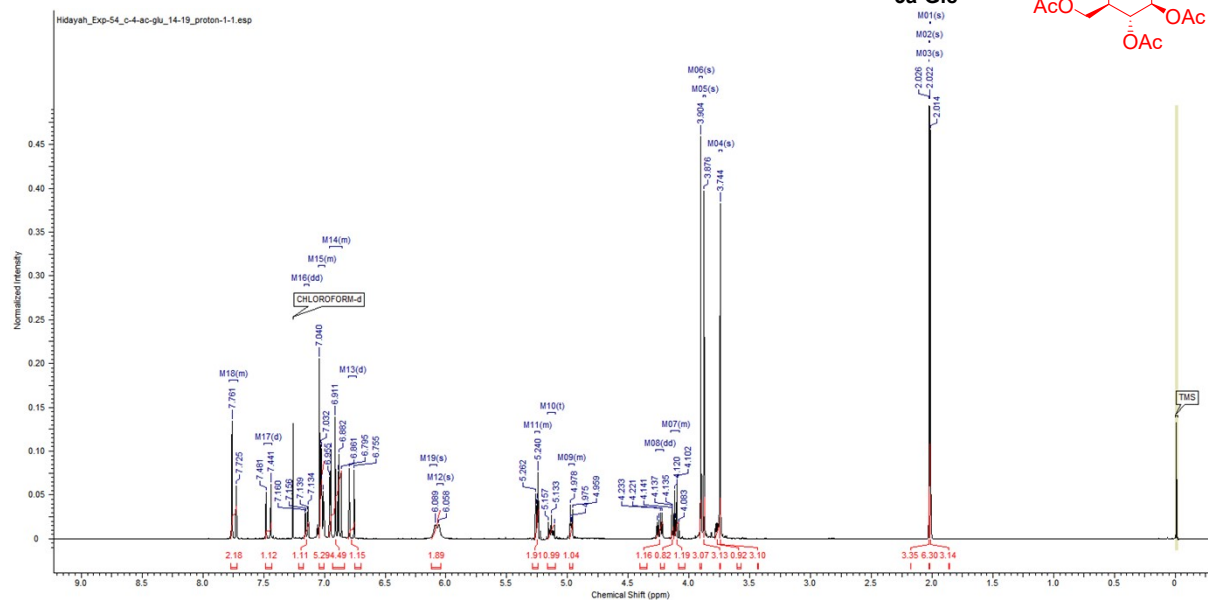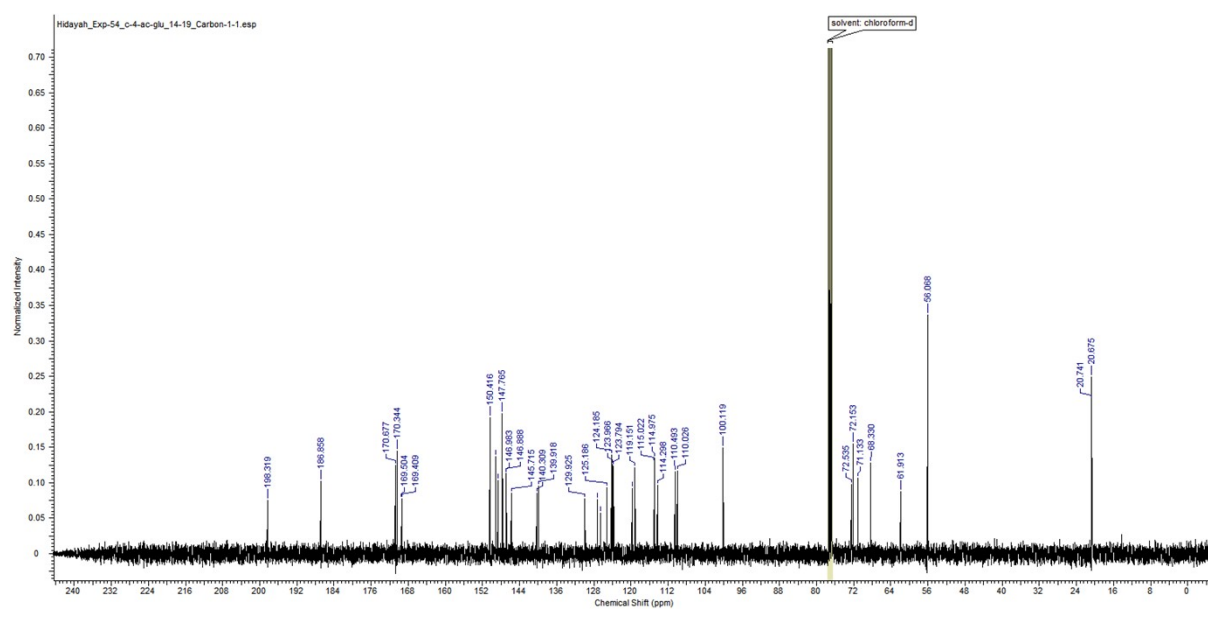

(2*R*,3*R*,4*S*,5*S*,6*S*)-2-(acetoxymethyl)-6-(4-((*E*)-5-(4-hydroxy-3-methoxyphenyl)-2-((*E*)-3-(4-hydroxy-3-methoxyphenyl)acryloyl)-3-oxopenta-1,4-dien-1-yl)-2-methoxyphenoxy)tetrahydro-2*H*-pyran-3,4,5-triyl triacetate (**3a-Man**)

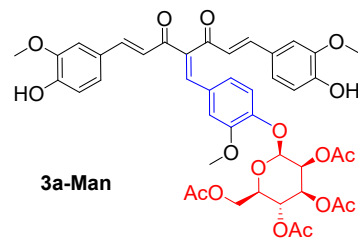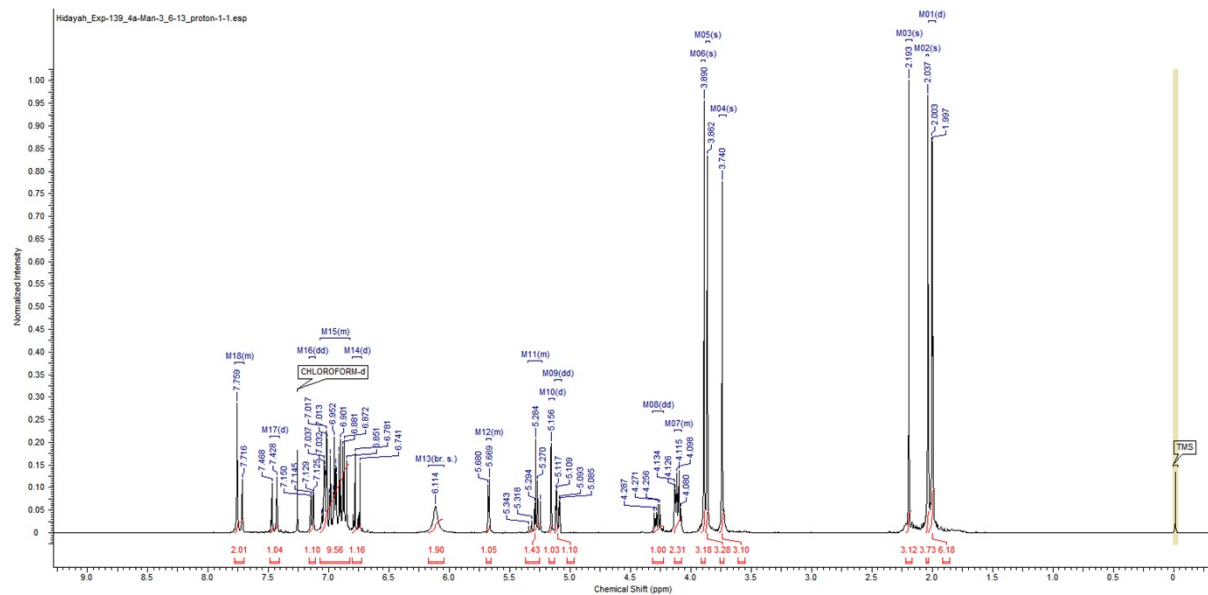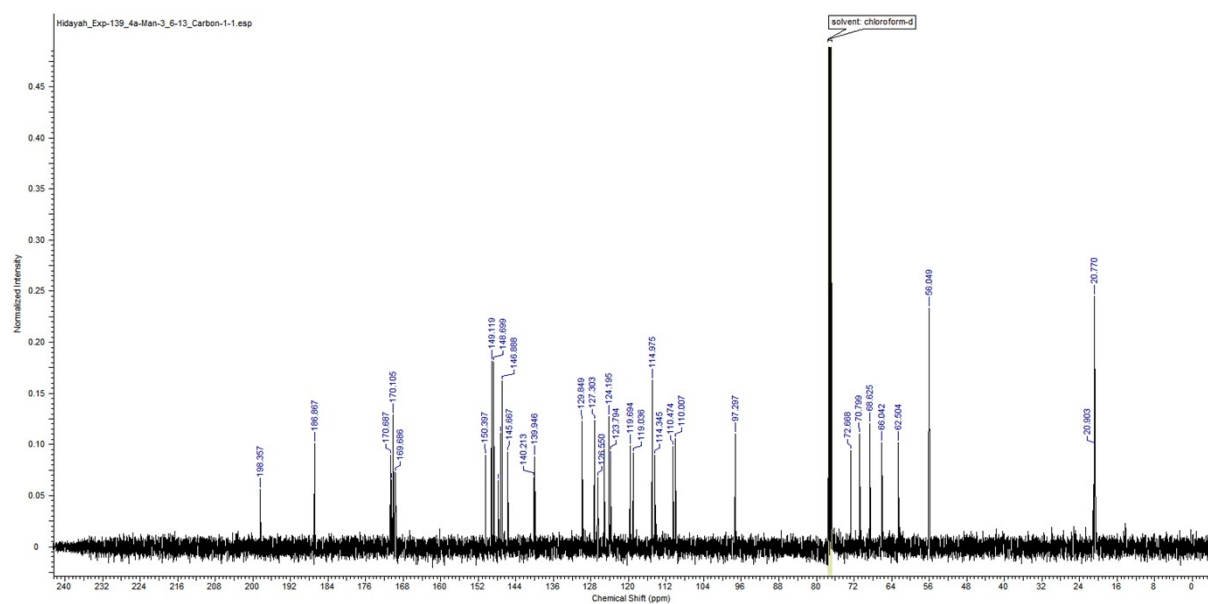

(2*R*,3*S*,4*S*,5*R*,6*S*)-2-(acetoxymethyl)-6-(3-((*E*)-5-(4-hydroxy-3-methoxyphenyl)-2-((*E*)-3-(4-hydroxy-3-methoxyphenyl)acryloyl)-3-oxopenta-1,4-dien-1-yl)phenoxy)tetrahydro-2*H*-pyran-3,4,5-triyl triacetate (**4a-Gal**)

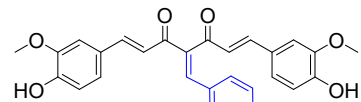

**4a-Gal**

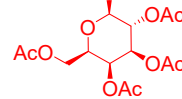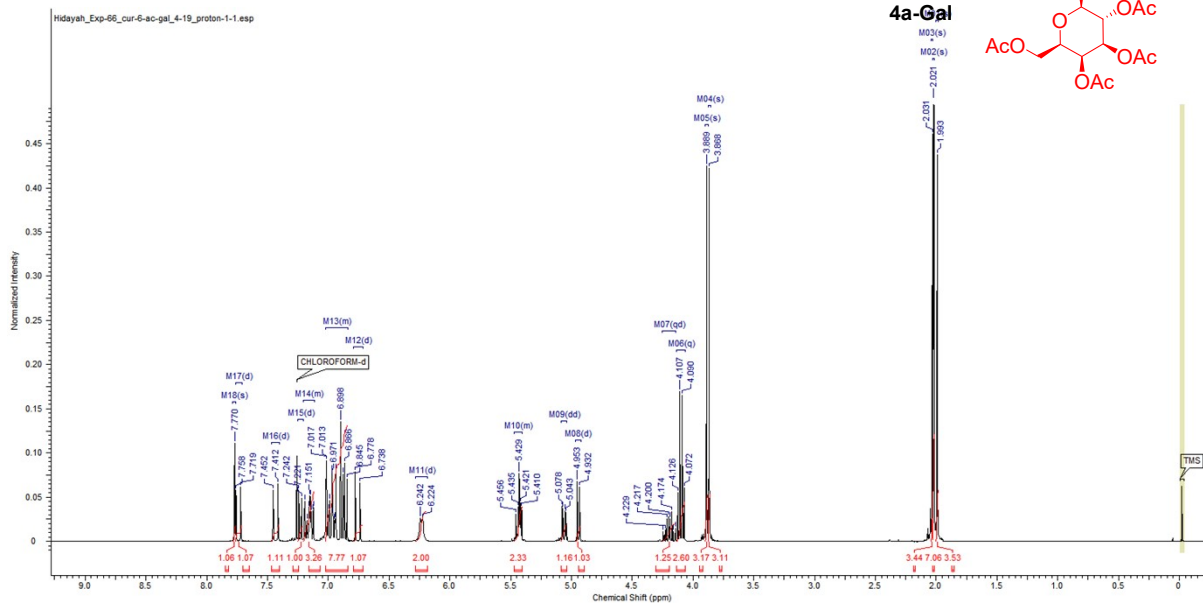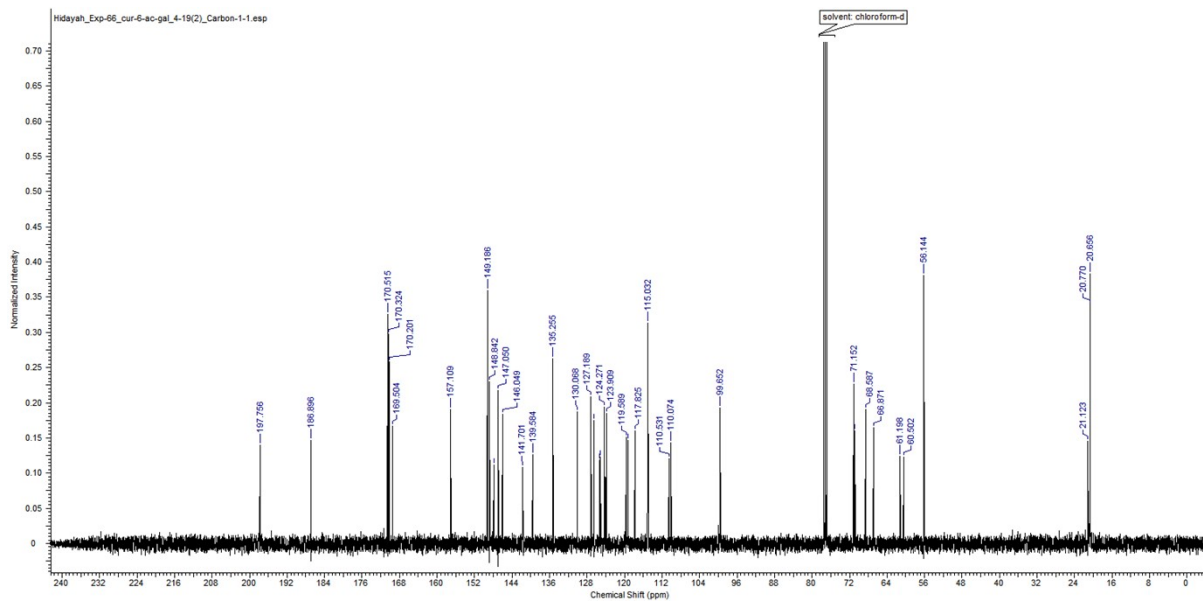

(2*R*,3*R*,4*S*,5*R*,6*S*)-2-(acetoxymethyl)-6-(3-((*E*)-5-(4-hydroxy-3-methoxyphenyl)-2-((*E*)-3-(4-hydroxy-3-methoxyphenyl)acryloyl)-3-oxopenta-1,4-dien-1-yl)phenoxy)tetrahydro-2*H*-pyran-3,4,5-triyl triacetate (**4a-Glc**)

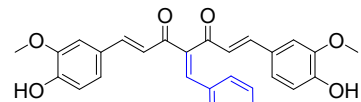

**4a-Glc**

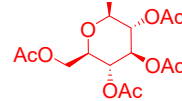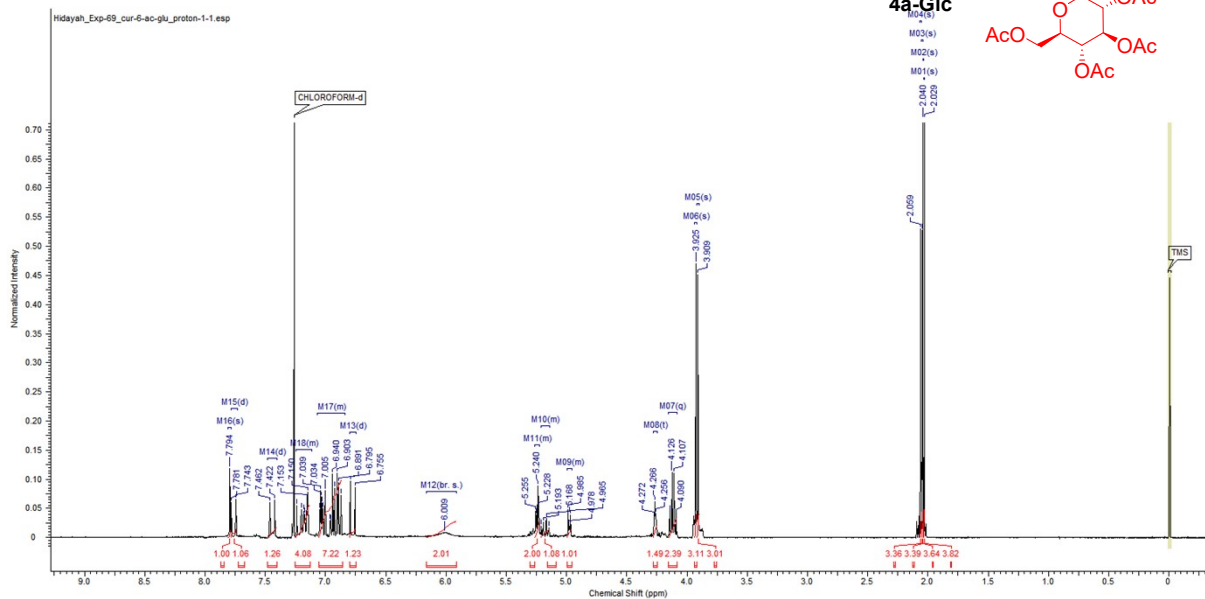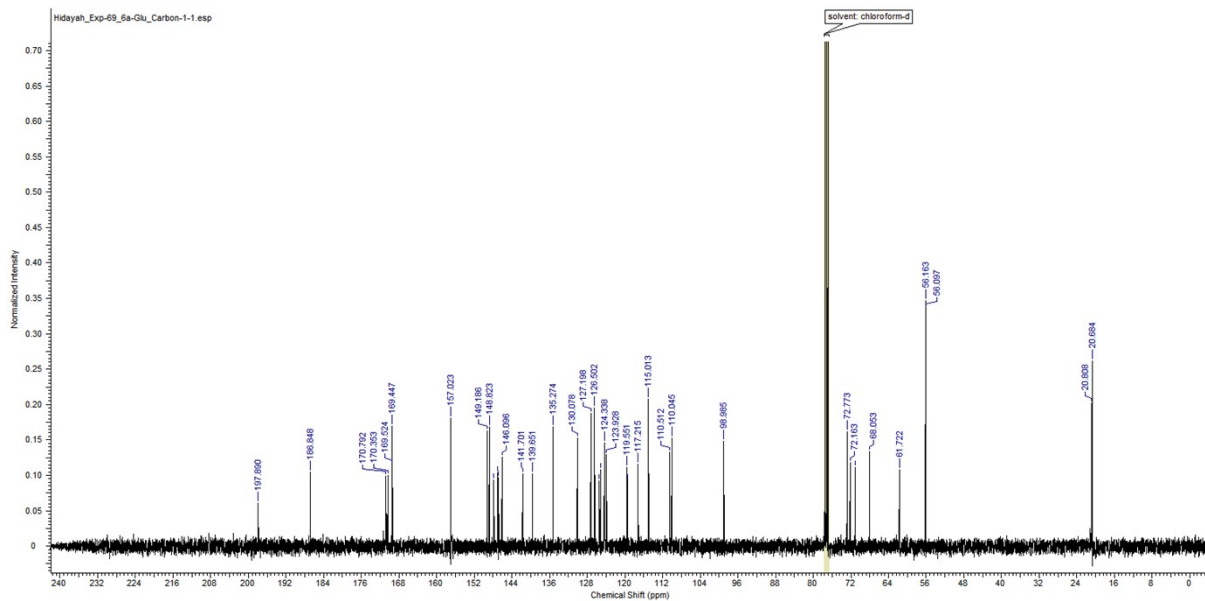

(3*a*S,5*R*,6*R*,7*S*,7*a*S)-5-(acetoxymethyl)-2-(3-((*E*)-5-(4-hydroxy-3-methoxyphenyl)-2-((*E*)-3-(4-hydroxy-3-methoxyphenyl)acryloyl)-3-oxopenta-1,4-dien-1-yl)phenoxy)-2-methyltetrahydro-5*H*-[1,3]dioxolo[4,5-*b*]pyran-6,7-diyl diacetate (**4a-Man**)

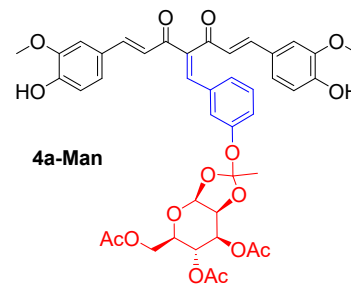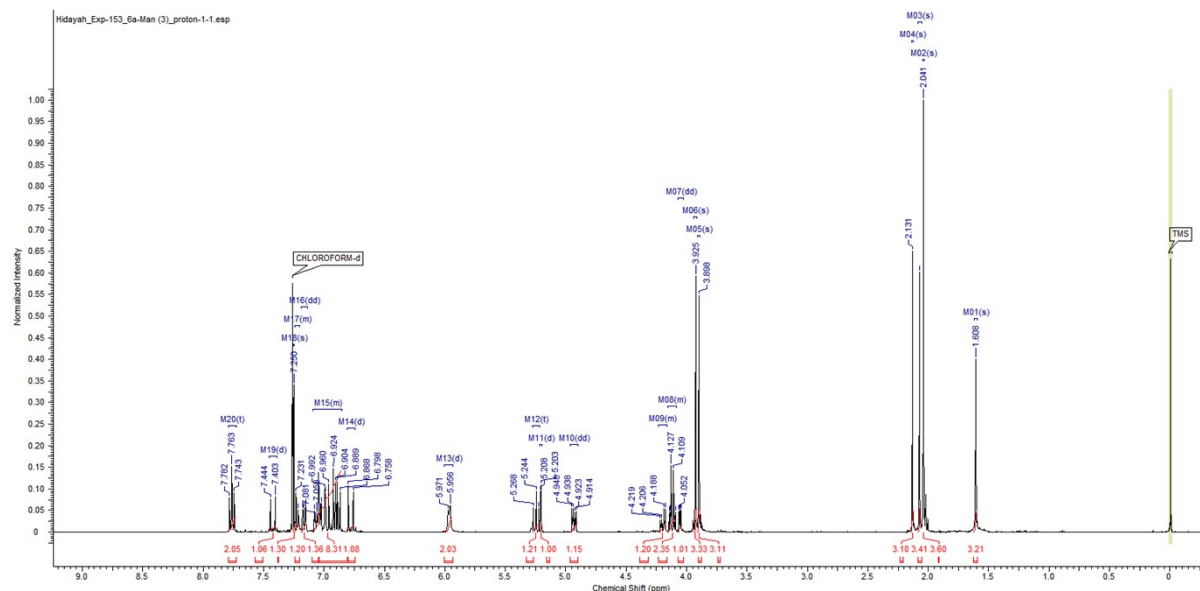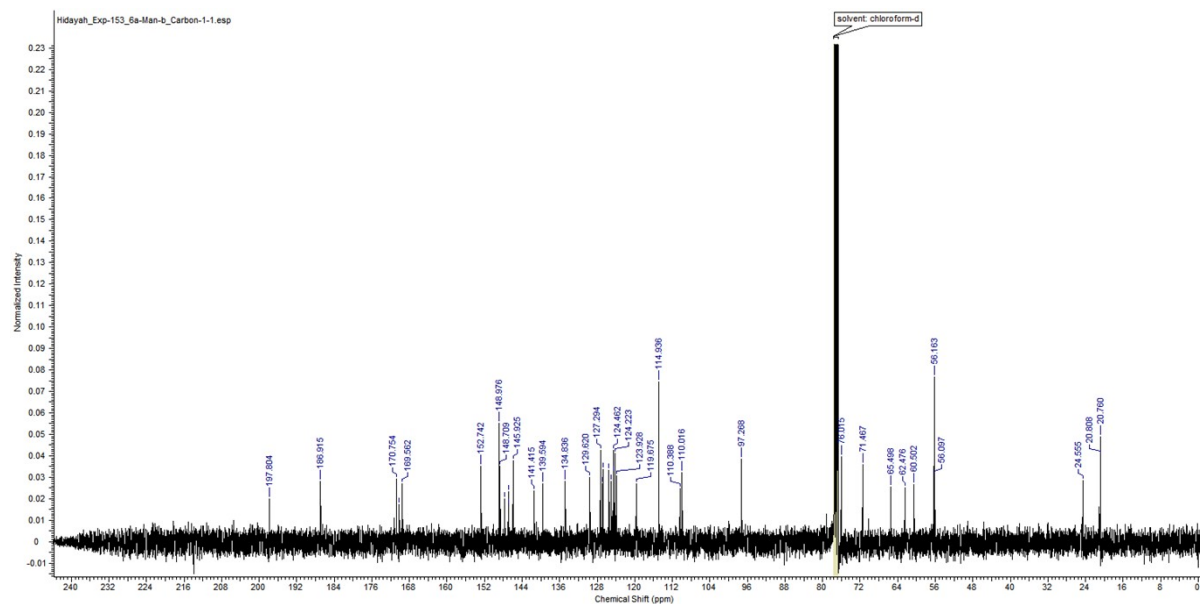

### 2.3 Deacetylated glycoside derivatives

1,7-bis(4-hydroxy-3-methoxyphenyl)-4-(4-(((2S,3R,4S,5R,6R)-3,4,5-trihydroxy-6-(hydroxymethyl)tetrahydro-2H-pyran-2-yl)oxy)benzylidene)hepta-1,6-diene-3,5-dione (**2b-Gal**)

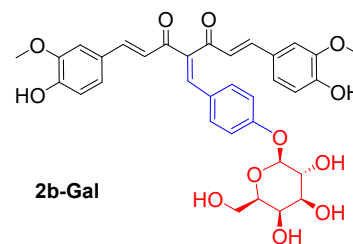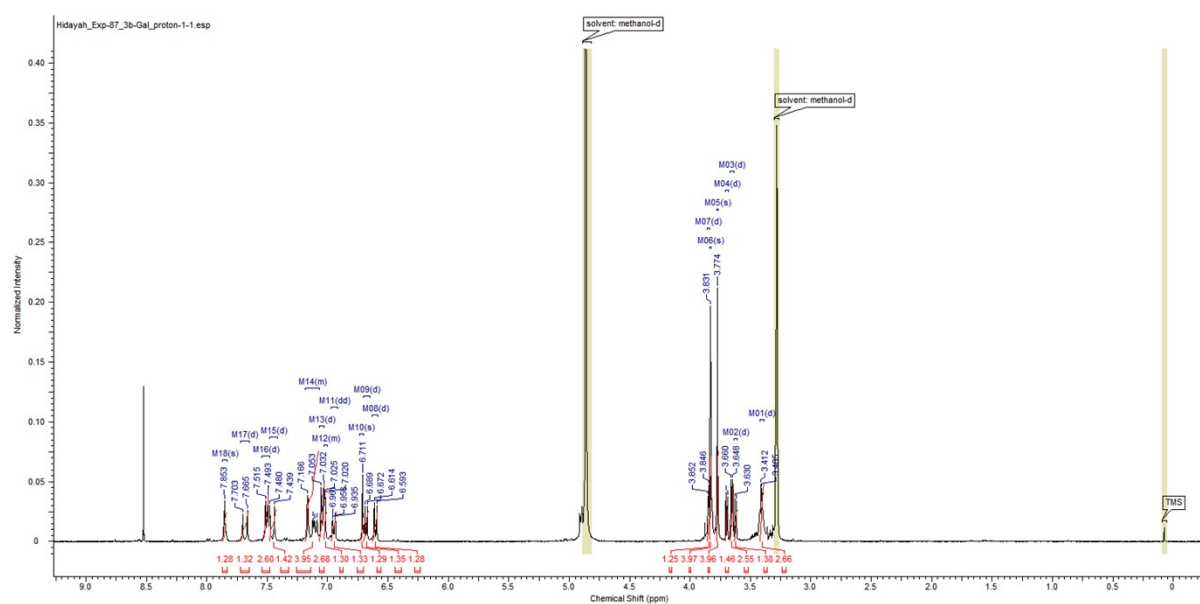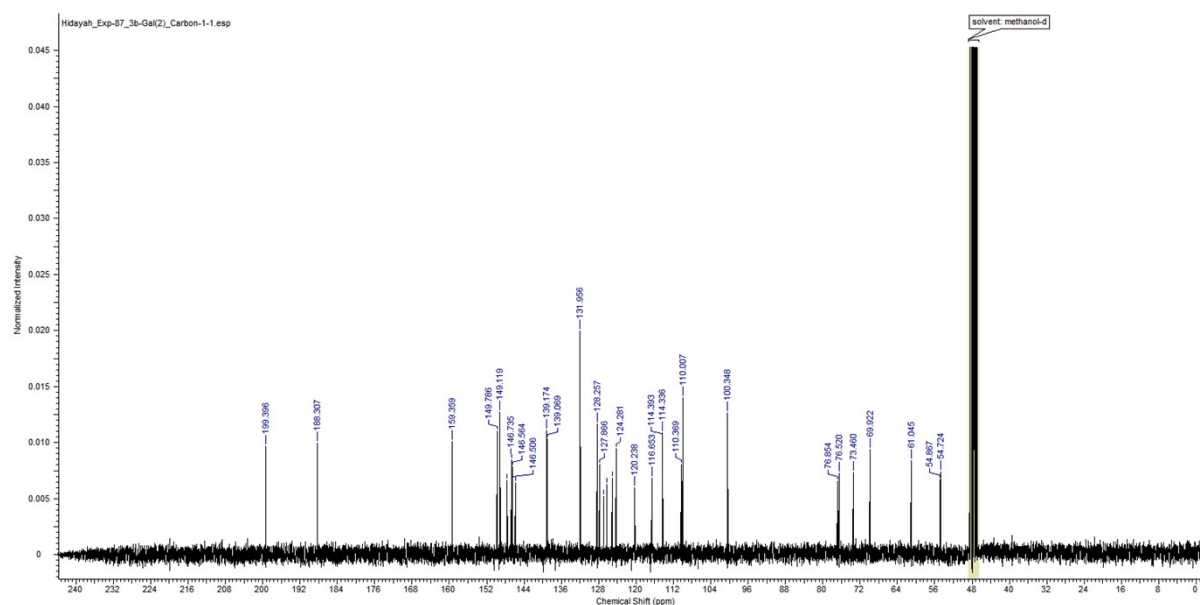

1,7-bis(4-hydroxy-3-methoxyphenyl)-4-(4-(((2S,3R,4S,5S,6R)-3,4,5-trihydroxy-6-(hydroxymethyl)tetrahydro-2H-pyran-2-yl)oxy)benzylidene)hepta-1,6-diene-3,5-dione (**2b-Glc**)

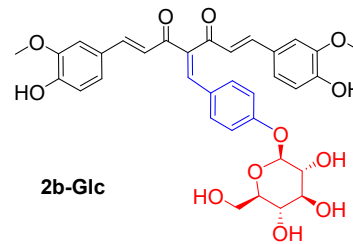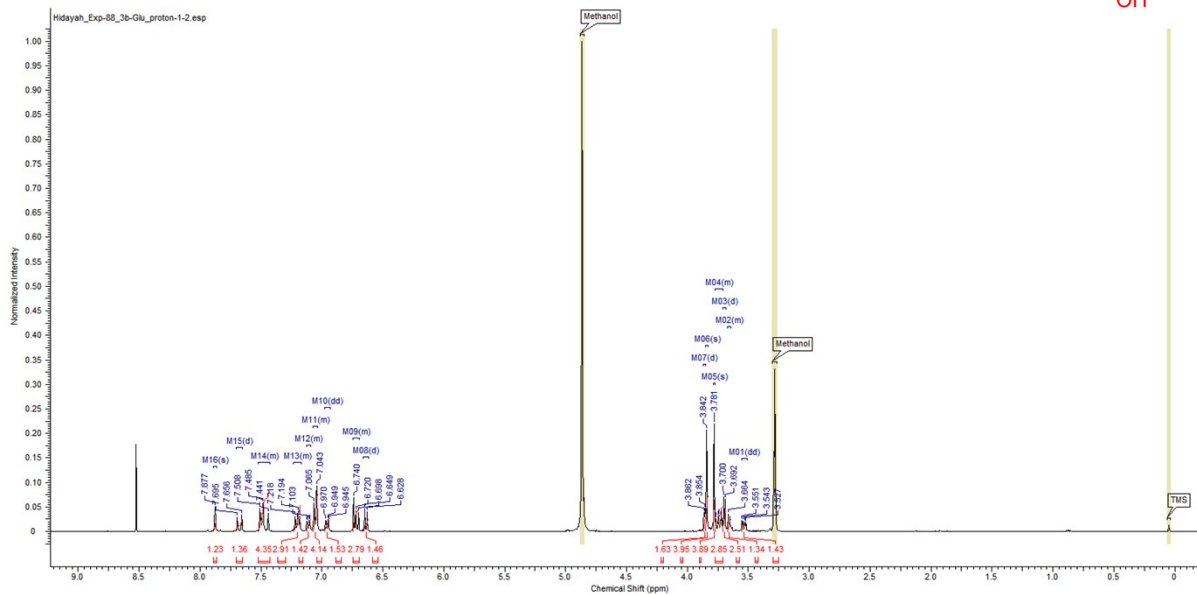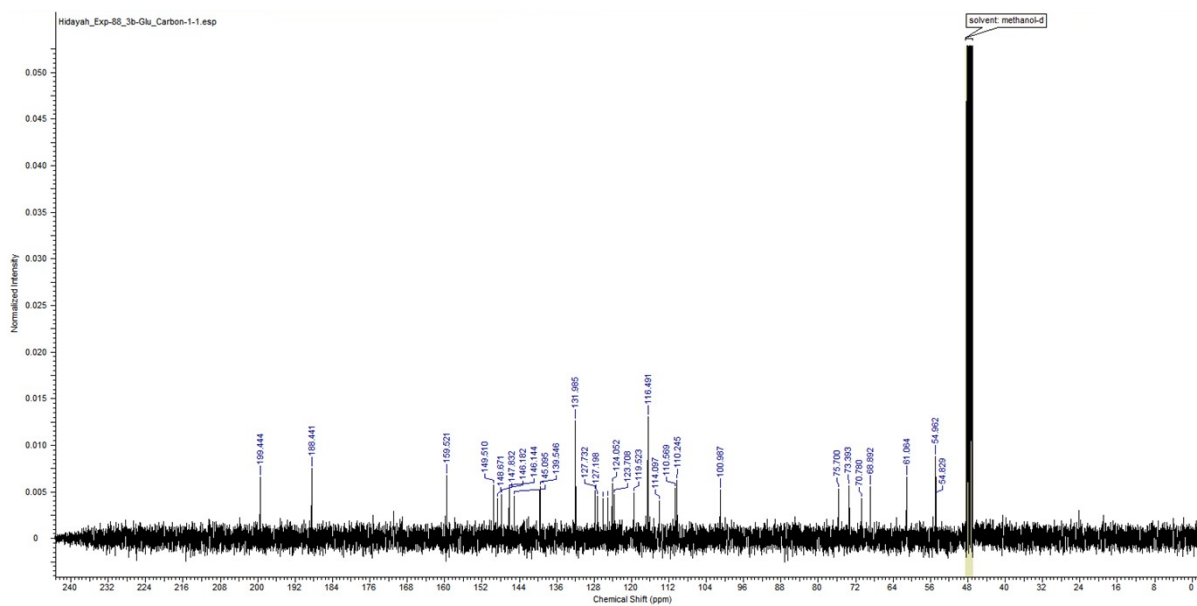

1,7-bis(4-hydroxy-3-methoxyphenyl)-4-(4-(((2S,3S,4S,5S,6R)-3,4,5-trihydroxy-6-(hydroxymethyl)tetrahydro-2H-pyran-2-yl)oxy)benzylidene)hepta-1,6-diene-3,5-dione (**2b-Man**)

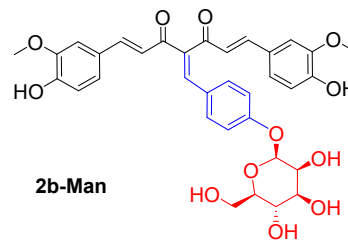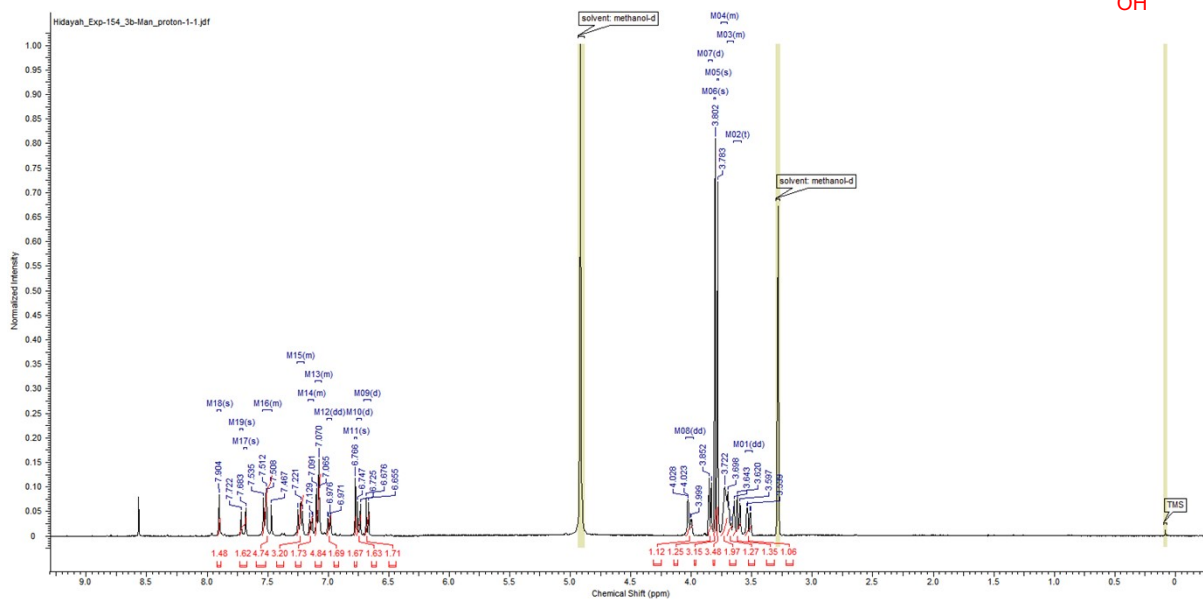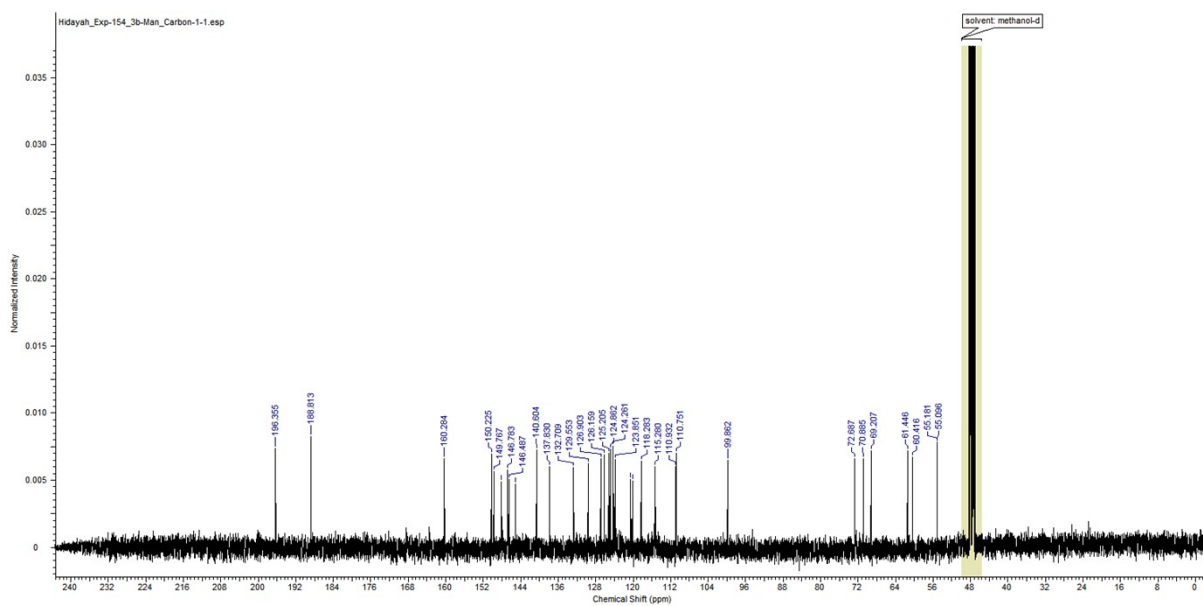

1,7-bis(4-hydroxy-3-methoxyphenyl)-4-(3-methoxy-4-(((2S,3R,4S,5R,6R)-3,4,5-trihydroxy-6-(hydroxymethyl)tetrahydro-2H-pyran-2-yl)oxy)benzylidene)hepta-1,6-diene-3,5-dione (**3b-Gal**)

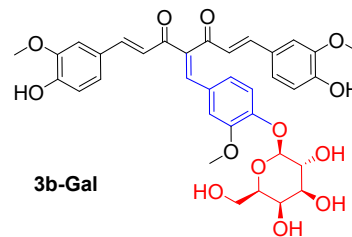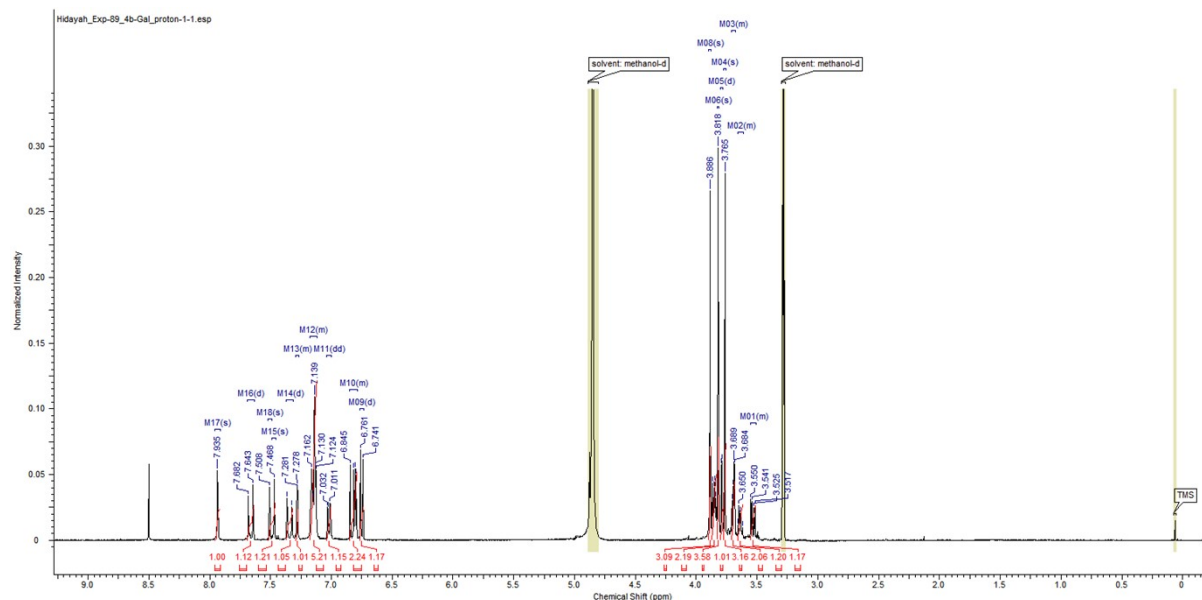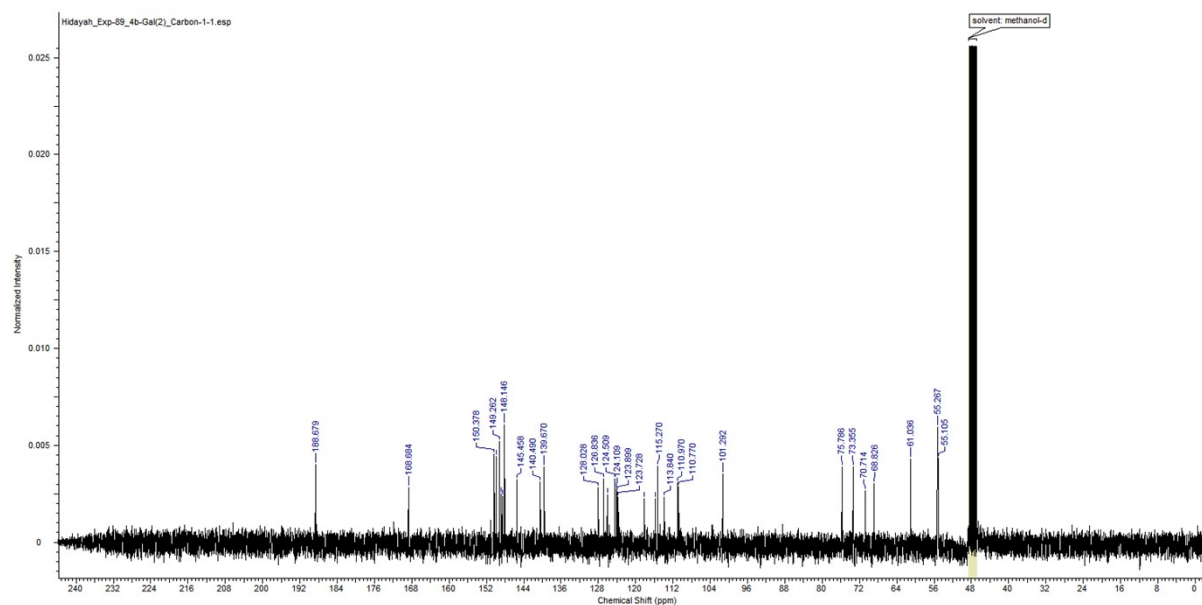

1,7-bis(4-hydroxy-3-methoxyphenyl)-4-(3-methoxy-4-(((2*S*,3*R*,4*S*,5*S*,6*R*)-3,4,5-trihydroxy-6-(hydroxymethyl)tetrahydro-2*H*-pyran-2-yl)oxy)benzylidene)hepta-1,6-diene-3,5-dione (**3b-Glc**)

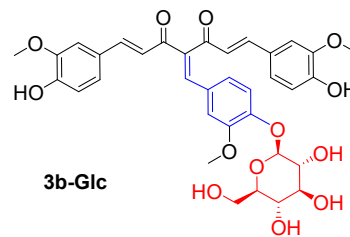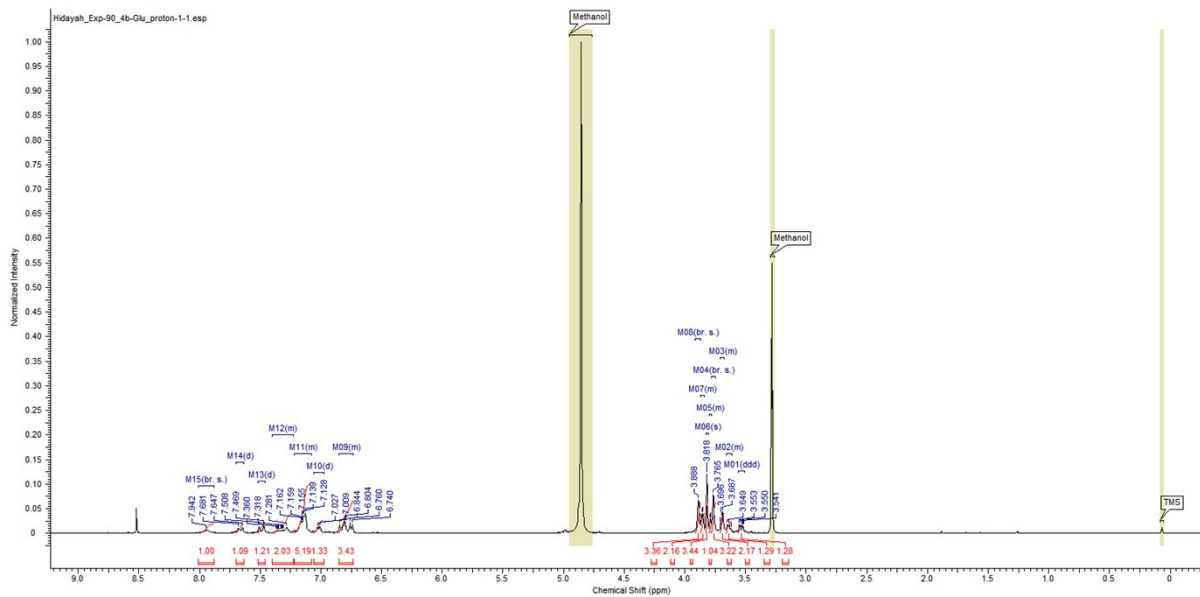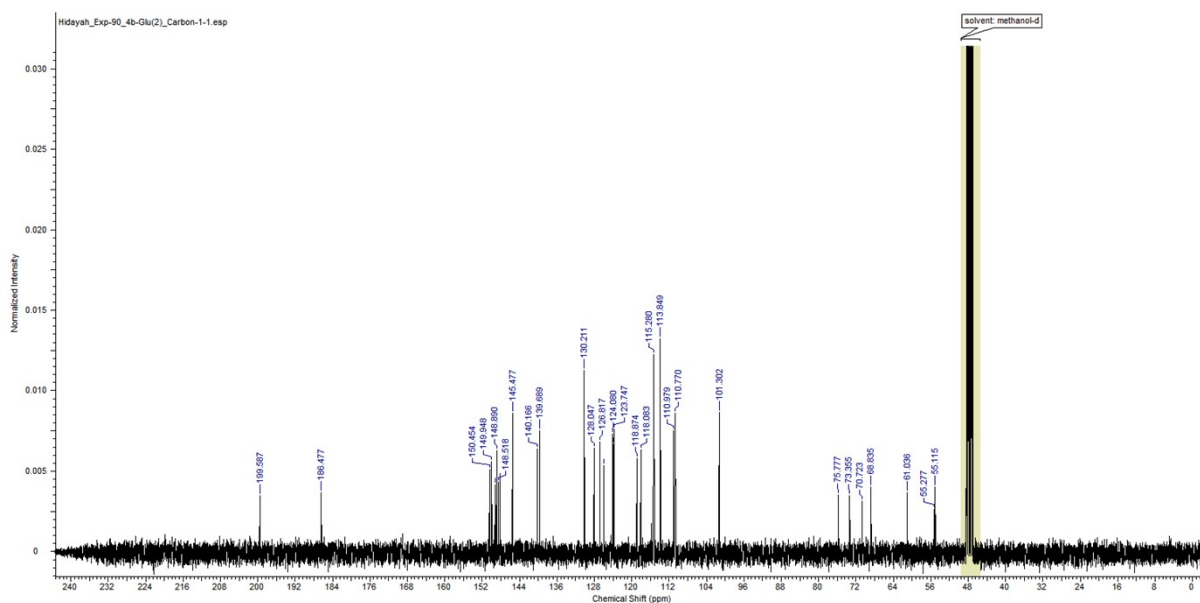

1,7-bis(4-hydroxy-3-methoxyphenyl)-4-(3-methoxy-4-(((2S,3S,4S,5S,6R)-3,4,5-trihydroxy-6-(hydroxymethyl)tetrahydro-2H-pyran-2-yl)oxy)benzylidene)hepta-1,6-diene-3,5-dione (**3b-Man**)

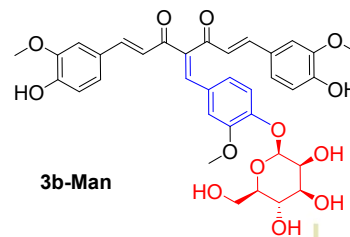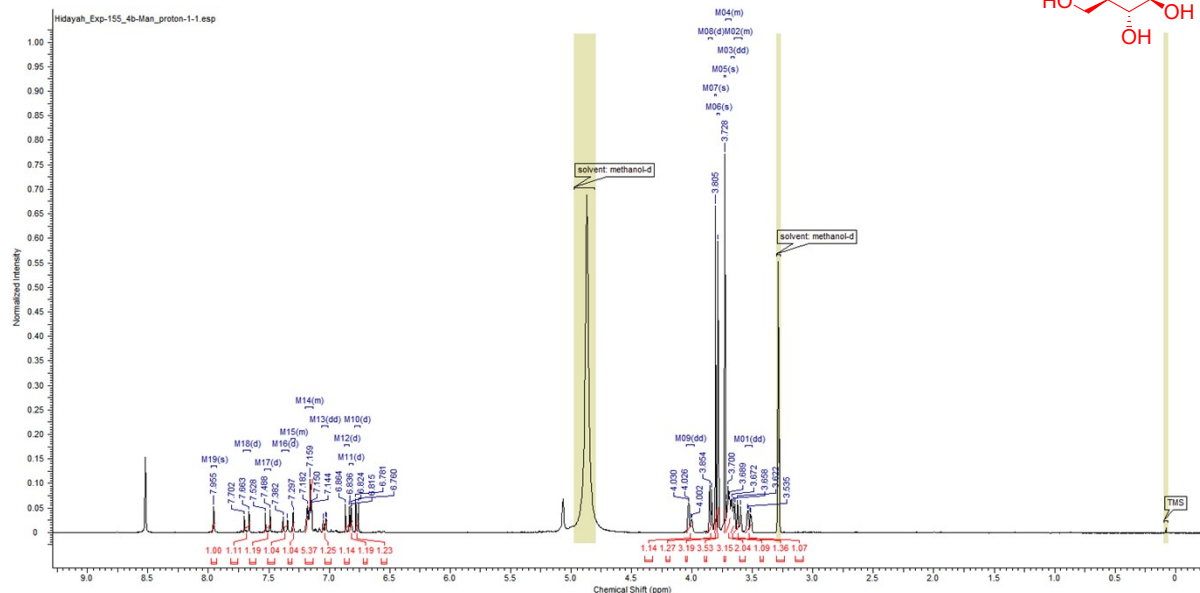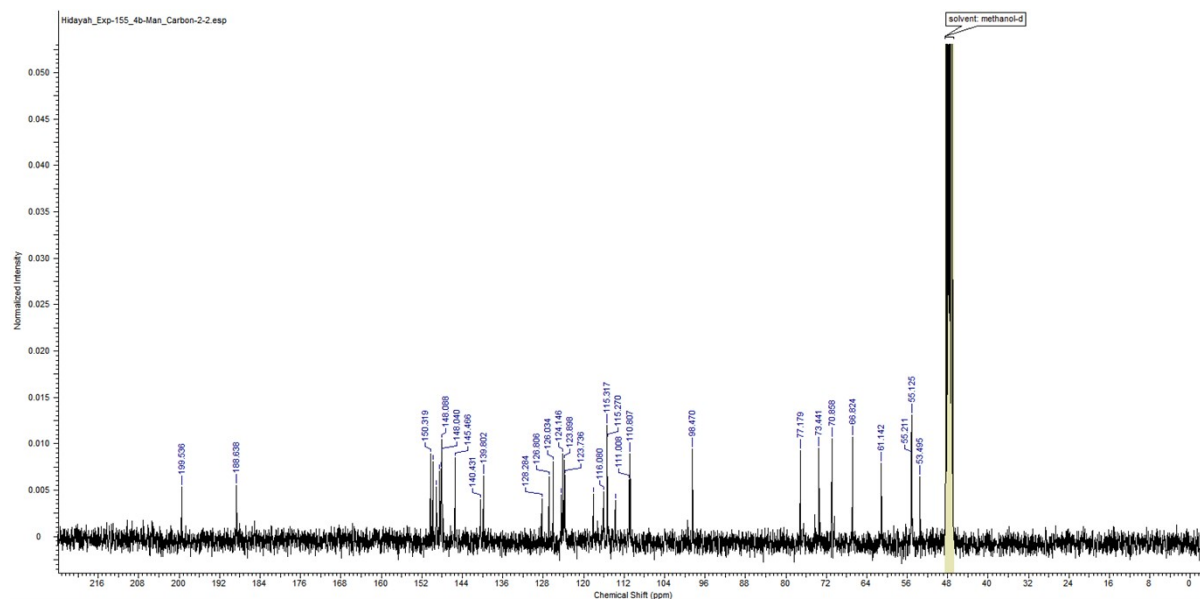

1,7-bis(4-hydroxy-3-methoxyphenyl)-4-(3-(((2S,3R,4S,5R,6R)-3,4,5-trihydroxy-6-(hydroxymethyl)tetrahydro-2H-pyran-2-yl)oxy)benzylidene)hepta-1,6-diene-3,5-dione (**4b-Gal**)

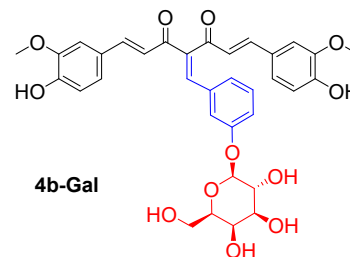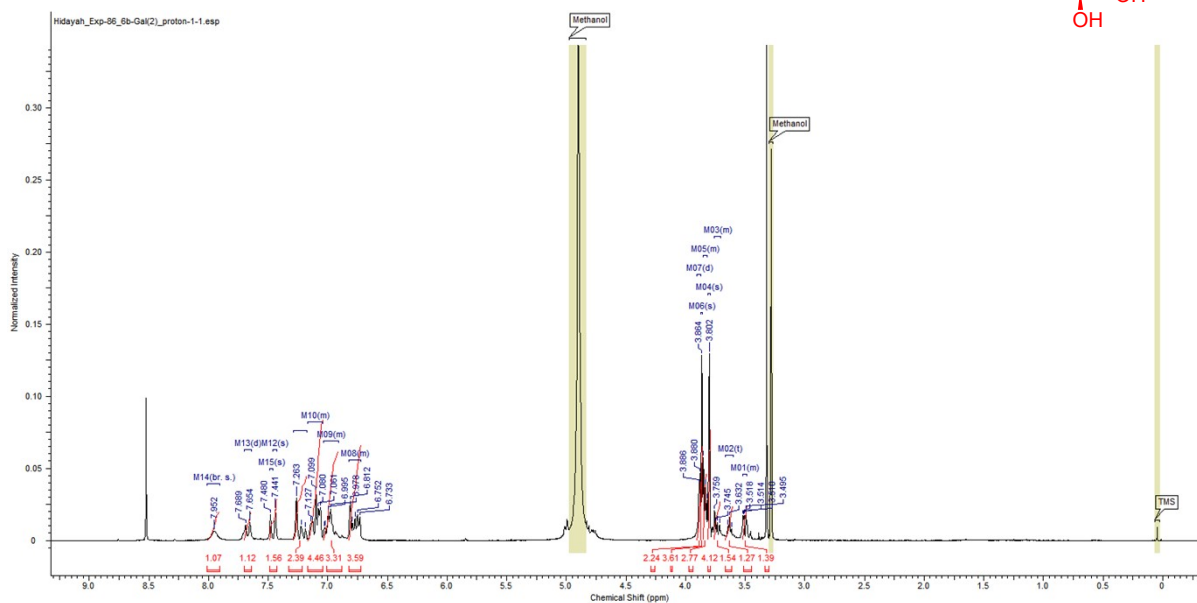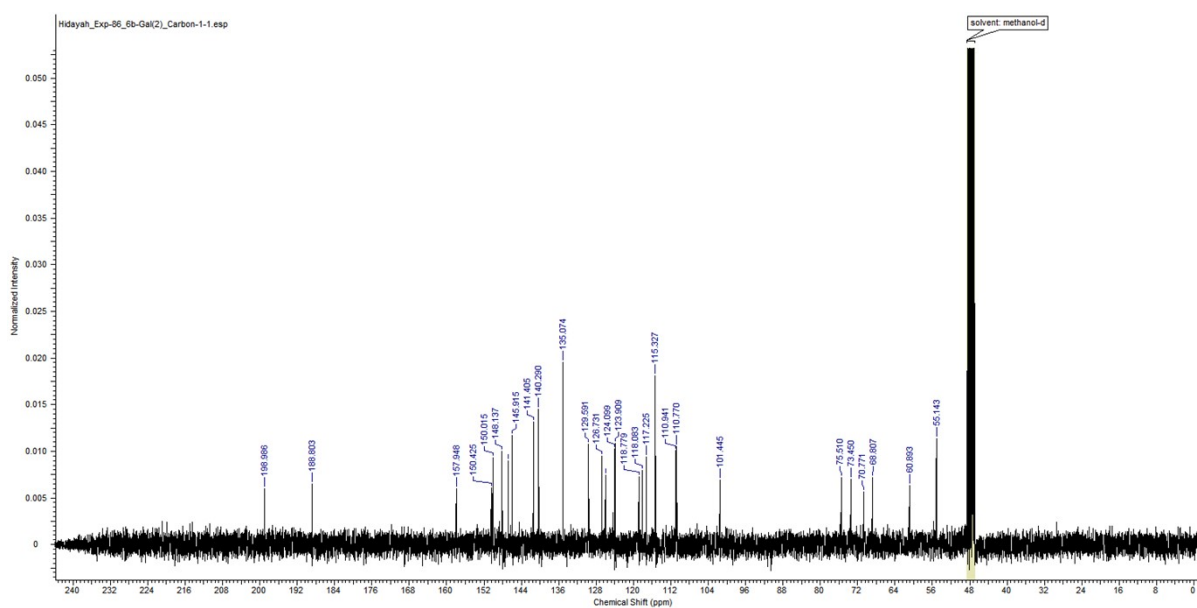

1,7-bis(4-hydroxy-3-methoxyphenyl)-4-(3-(((2S,3R,4S,5S,6R)-3,4,5-trihydroxy-6-(hydroxymethyl)tetrahydro-2H-pyran-2-yl)oxy)benzylidene)hepta-1,6-diene-3,5-dione (**4b-Glc**)

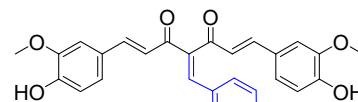

**4b-Glc**

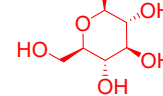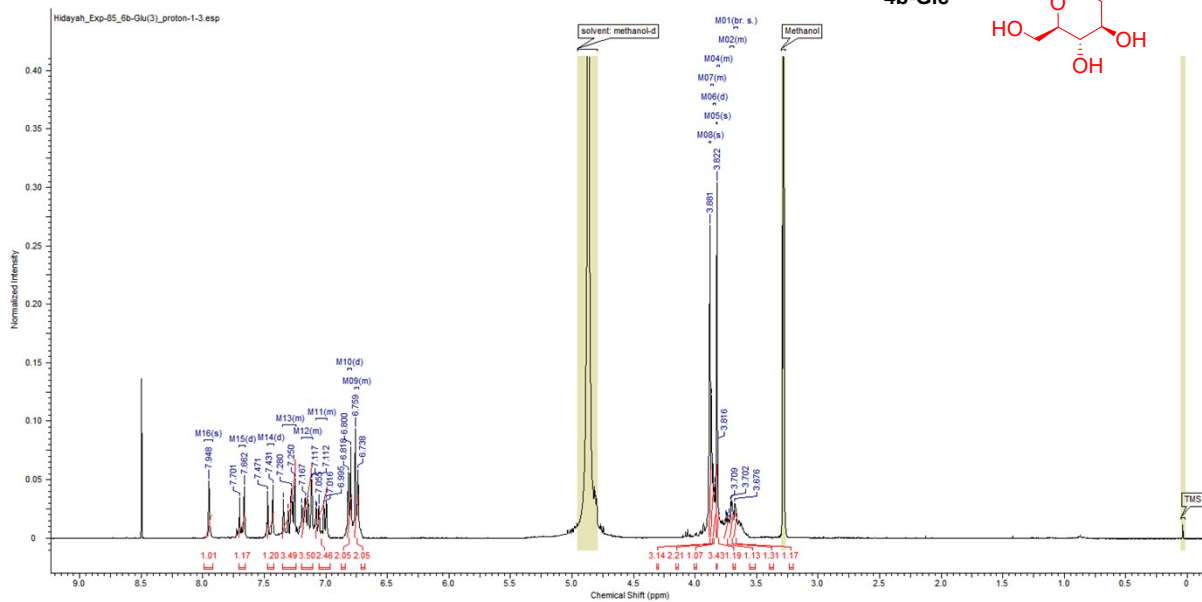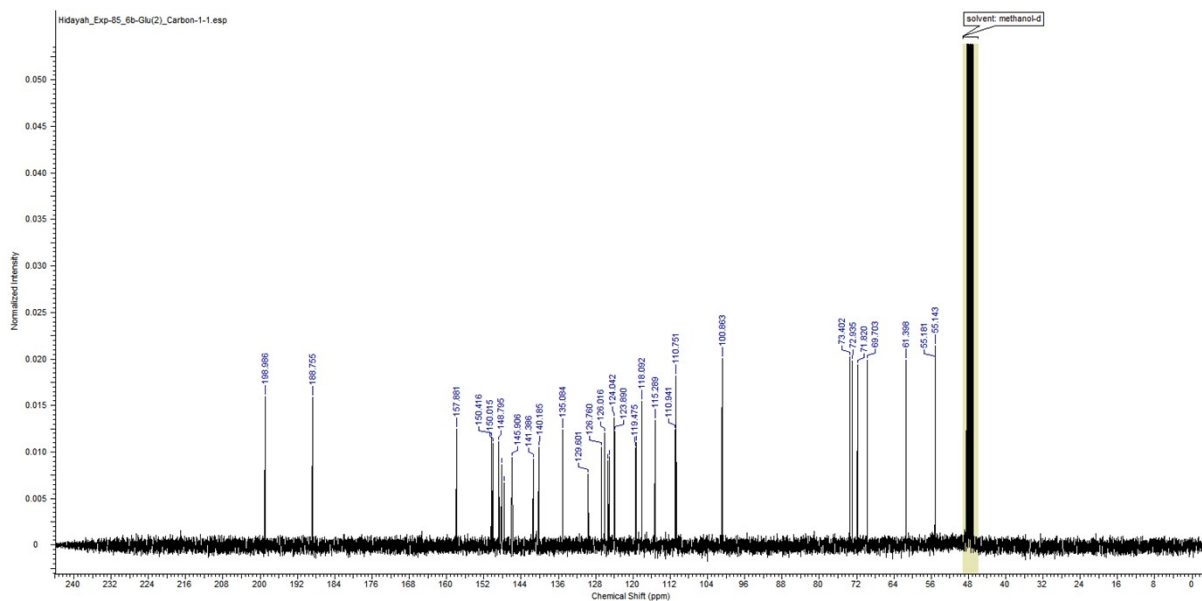

4-(3-(((3a*S*,5*R*,6*S*,7*S*,7a*S*)-6,7-dihydroxy-5-(hydroxymethyl)-2-methyltetrahydro-5*H*-[1,3]dioxolo[4,5-*b*]pyran-2-yl)oxy)benzylidene)-1,7-bis(4-hydroxy-3-methoxyphenyl)hepta-1,6-diene-3,5-dione (**4b-Man**)

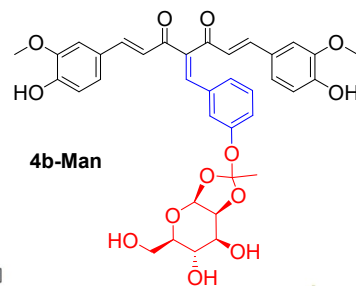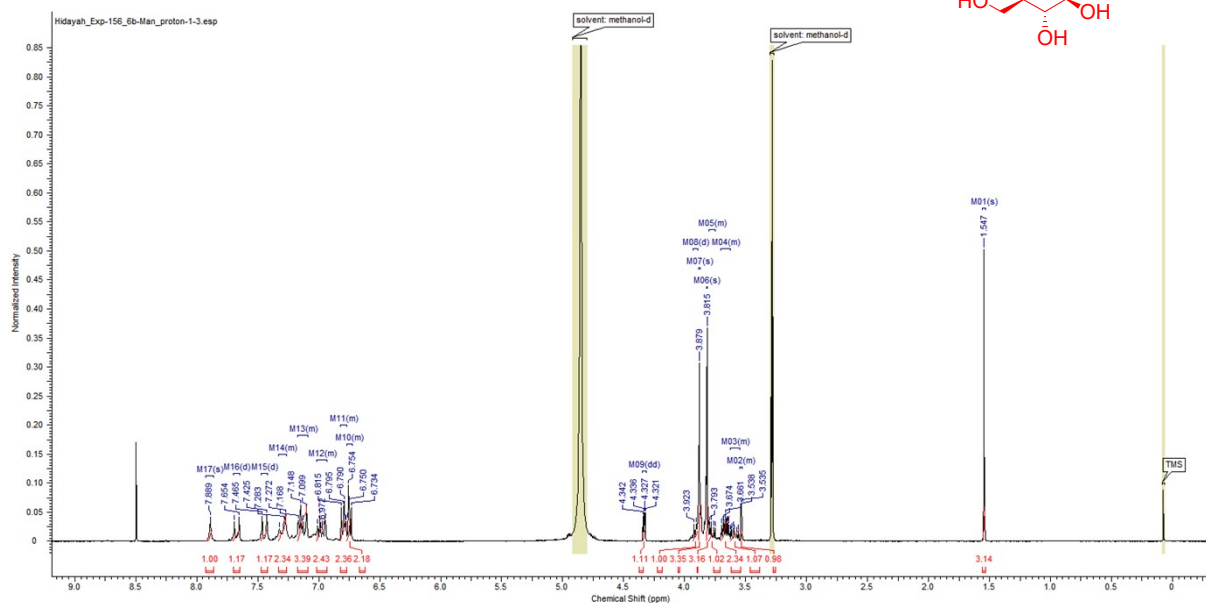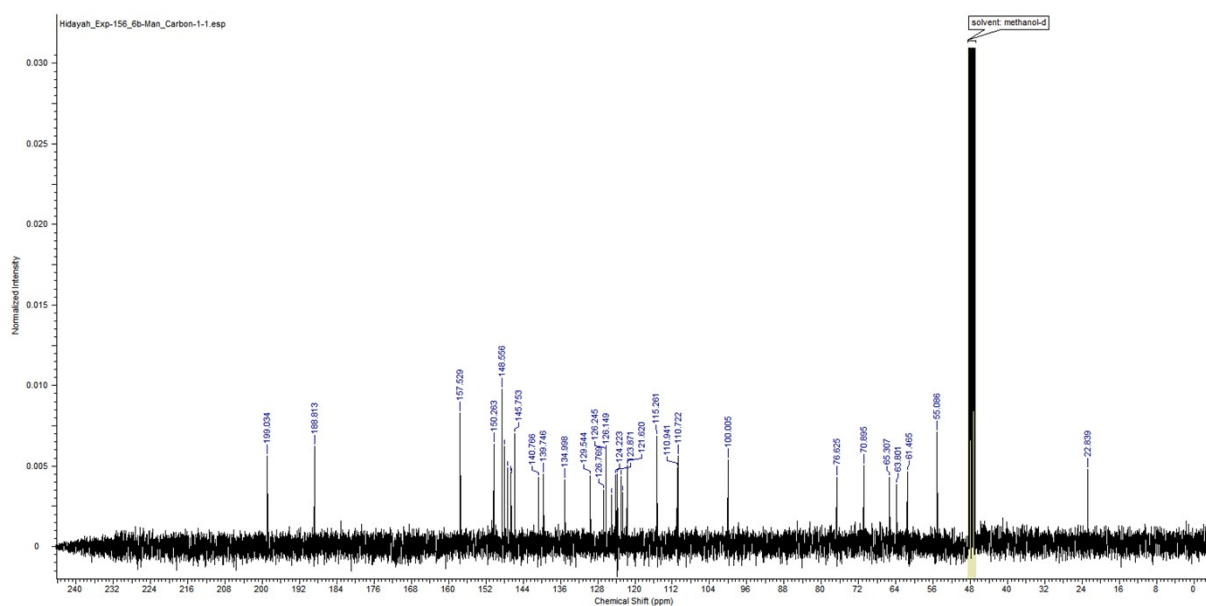

### 3. *In vitro* pLDH antiplasmodial activity

Graphs of parasite growth against the concentration of glycoside compounds from pLDH assays

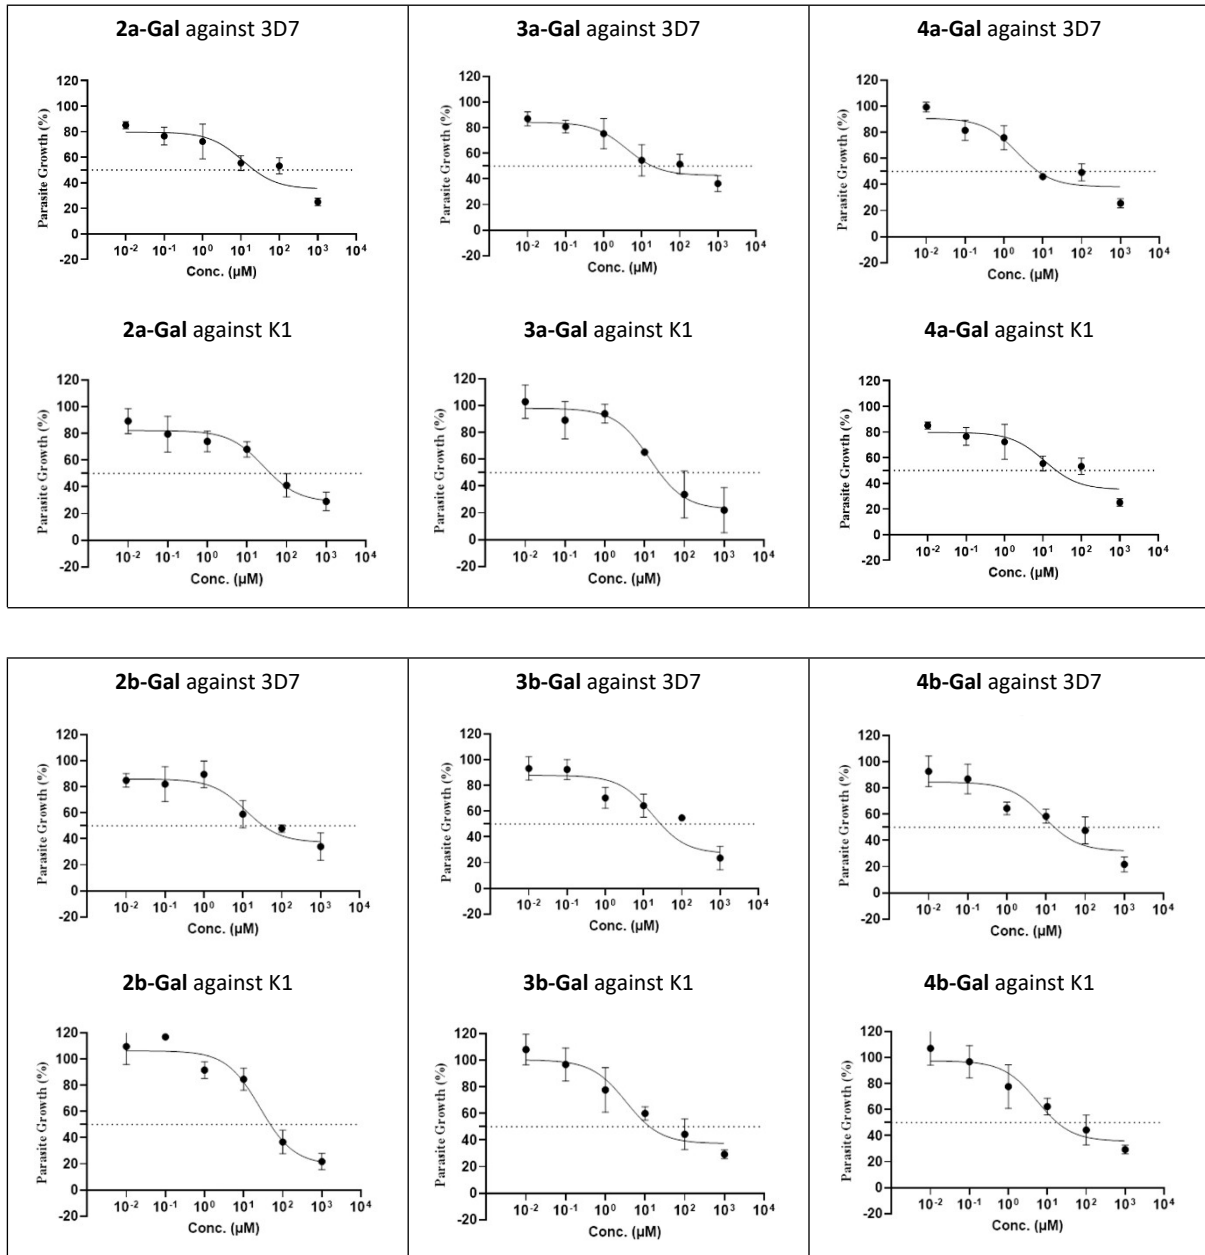

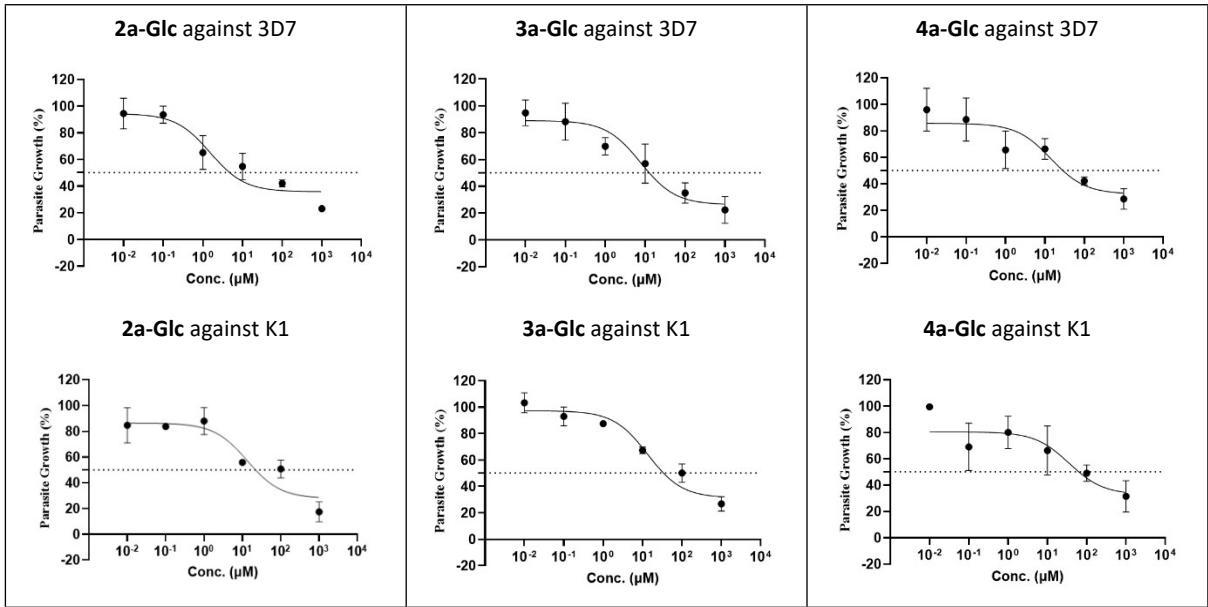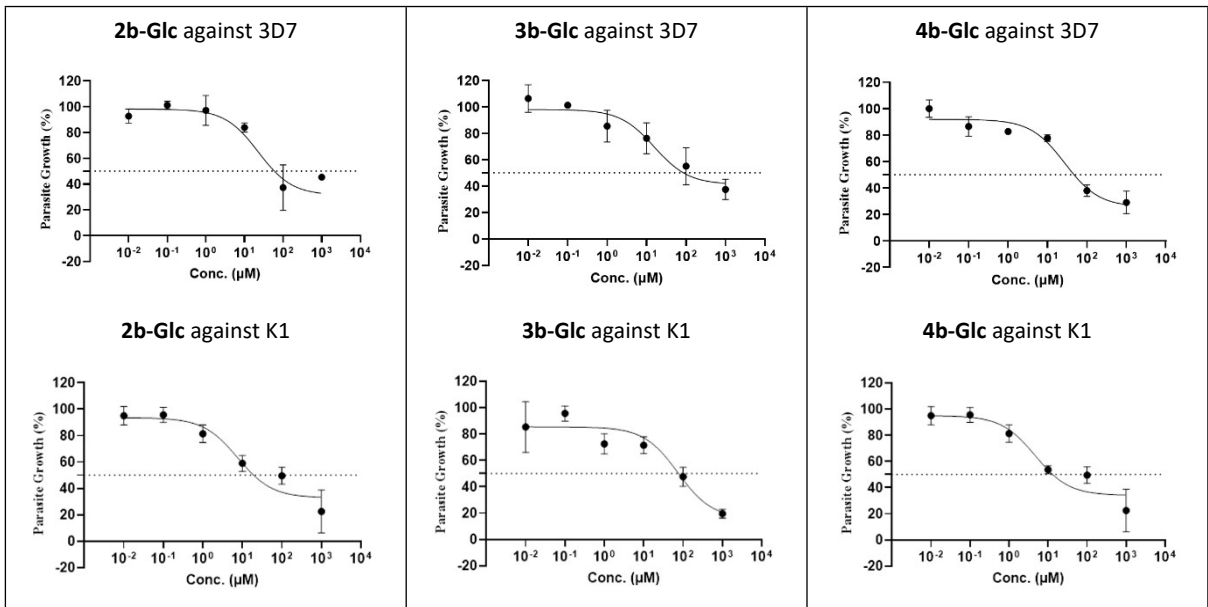

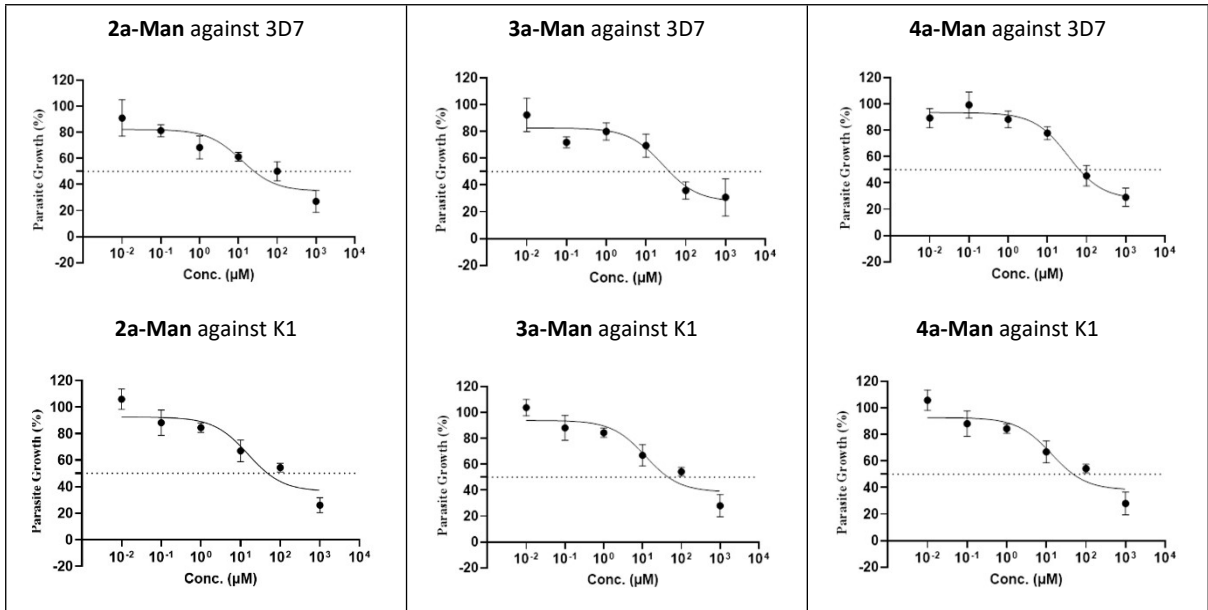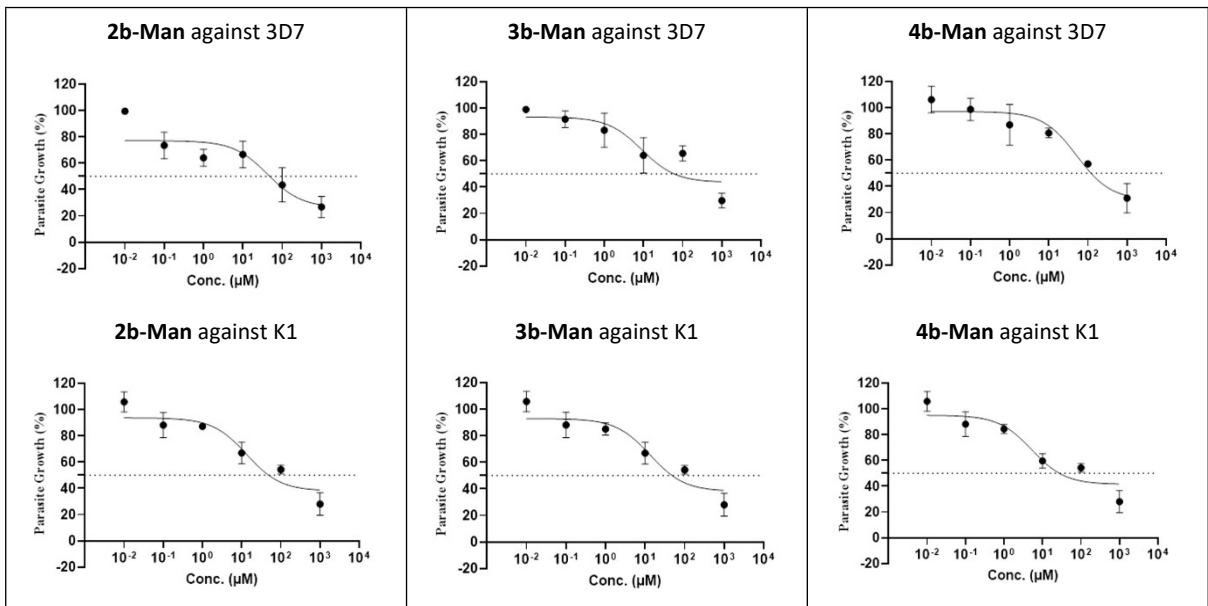

#### 4. Cytotoxicity from MTT WRL-68 assay

Graphs of cell viability against the log of concentration of glycoside derivative compounds from the MTT WRL-68 assay

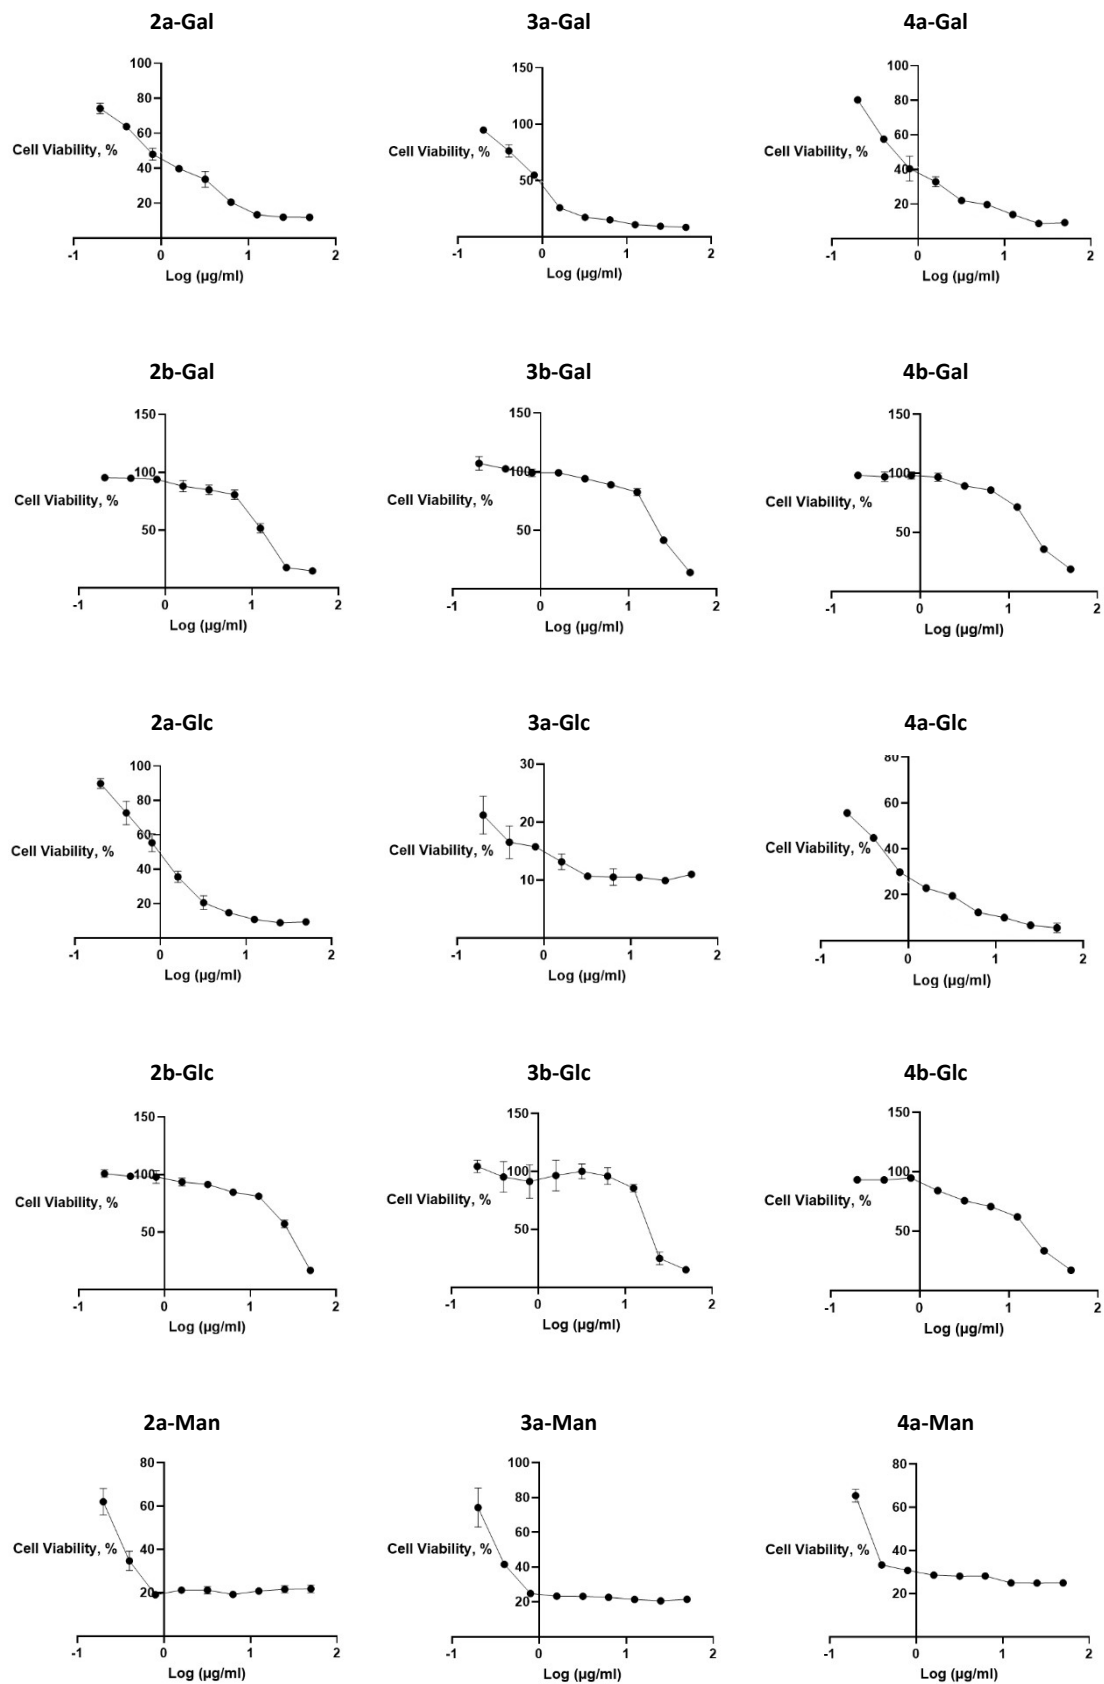

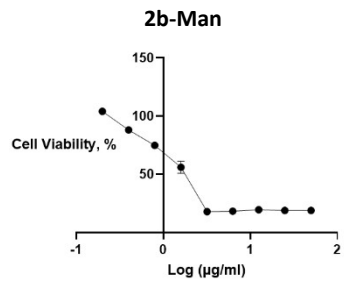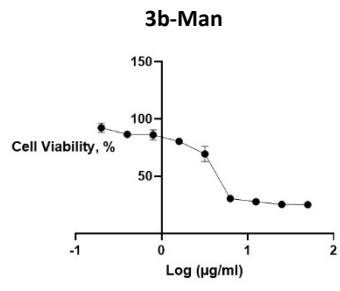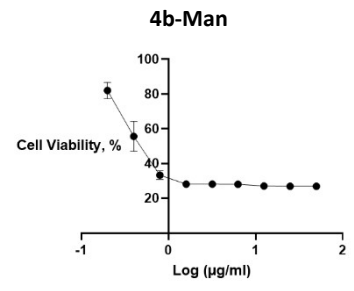

## 5. Binding interactions to GSK-3 $\beta$ from molecular docking

Curcumin glycoside derivatives categorised according to the type of conjugated sugar and the affinity towards GSK-3 $\beta$

| Compound                | Binding energy, kcal/mol | Inhibition constant (K <sub>i</sub> ), $\mu$ M | Type of interaction      | Amino acid residues involved in binding                                   |
|-------------------------|--------------------------|------------------------------------------------|--------------------------|---------------------------------------------------------------------------|
| <b>1</b>                | -7.44                    | 1.02                                           | Hydrogen bonds           | Asp133, Tyr134, Arg141, Asn186, Cys199                                    |
|                         |                          |                                                | Hydrophobic interactions | Ile62, Val70, Ala83, Leu188, Cys199                                       |
| <b>3</b>                | -9.42                    | 1.04                                           | Hydrogen bonds           | Ile62, Asp133, Tyr134, Pro136, Arg144, Cys199                             |
|                         |                          |                                                | Hydrophobic interactions | Ile62, Val70, Ala83, Val110, Leu132, Arg141, Leu188, Cys199               |
| <b>4</b>                | -9.07                    | 1.01                                           | Hydrogen bonds           | Val61, Arg141, Asp133                                                     |
|                         |                          |                                                | Hydrophobic interactions | Ile62, Gly63, Val70, Ala83, Leu132, Leu188, Cys199                        |
| <b>6</b>                | -9.08                    | 0.28                                           | Hydrogen bonds           | Ile62, Lys85, Val135, Arg141, Cys199, Asp200                              |
|                         |                          |                                                | Hydrophobic interactions | Ile62, Val70, Ala83, Lys85, Val110, Leu132, Tyr134, Cys199                |
| Galactoside derivatives |                          |                                                |                          |                                                                           |
| <b>3a-Gal</b>           | -8.23                    | 0.92                                           | Hydrogen bonds           | Lys60, Tyr134, Val135, Arg141                                             |
|                         |                          |                                                | Hydrophobic interactions | Ile62, Val70, Cys122                                                      |
| <b>4a-Gal</b>           | -8.33                    | 0.78                                           | Hydrogen bonds           | Ile62, Gln172, Tyr134, Val135, Pro136, Arg141, Cys199, Asp200             |
|                         |                          |                                                | Hydrophobic interactions | Ile62, Val70, Ala83, Val110, Leu132, Tyr140, Cys199                       |
| <b>6a-Gal</b>           | -8.12                    | 1.13                                           | Hydrogen bonds           | Val61, Gly63, Gly65, Asp133, Tyr134, Arg141, Asn186                       |
|                         |                          |                                                | Hydrophobic interactions | Lys60, Ile62, Ala83, Tyr134, Arg141, Leu188                               |
| <b>3b-Gal</b>           | -9.54                    | 0.10                                           | Hydrogen bonds           | Val61, Ile62, Tyr134, Val135, Arg141, Arg144, Asp200                      |
|                         |                          |                                                | Hydrophobic interactions | Lys60, Ile62, Val70, Ala83, Lys85, Val110, Leu132, Thr138, Leu188, Cys199 |
| <b>4b-Gal</b>           | -10.21                   | 0.03                                           | Hydrogen bonds           | Ile62, Lys85, Glu97, Val135, Arg141, Arg144, Asn186, Asp200               |
|                         |                          |                                                | Hydrophobic interactions | Ile62, Val70, Lys85, Val110, Leu132, Cys199                               |
| <b>6b-Gal</b>           | -10.31                   | 0.03                                           | Hydrogen bonds           | Val61, Ile62, Asn64, Lys85, Glu97, Tyr134, Val135, Asp200                 |
|                         |                          |                                                | Hydrophobic interactions | Lys60, Ile62, Val70, Lys85, Val110, Leu132, Cys199                        |
| Glucoside derivatives   |                          |                                                |                          |                                                                           |
| <b>3a-Glc</b>           | -10.48                   | 0.02                                           | Hydrogen bonds           | Lys85, Glu97, Val135, Arg141, Arg144, Asp200                              |

|                       |        |      |                          |                                                                     |
|-----------------------|--------|------|--------------------------|---------------------------------------------------------------------|
|                       |        |      | Hydrophobic interactions | Ile62, Val70, Lys85, Val110, Leu132, Cys199                         |
| <b>4a-Glc</b>         | -10.14 | 0.04 | Hydrogen bonds           | Asn64, Tyr134, Val135, Arg141, Arg144                               |
|                       |        |      | Hydrophobic interactions | Lys60, Ile62, Ala83, Val110, Leu132, Leu188, Cys199                 |
| <b>6a-Glc</b>         | -9.69  | 0.08 | Hydrogen bonds           | Lys60, Gln72, Tyr134, Val135, Cys199                                |
|                       |        |      | Hydrophobic interactions | Ile62, Gly63, Val70, Lys85                                          |
| <b>3b-Glc</b>         | -9.75  | 0.07 | Hydrogen bonds           | Ile62, Lys85, Glu97, Tyr134, Val135, Pro136, Aps200                 |
|                       |        |      | Hydrophobic interactions | Ile62, Val70, Lys85, Met101, Val110, Leu132, Cys199                 |
| <b>4b-Glc</b>         | -9.59  | 0.09 | Hydrogen bonds           | Ile62, Lys85, Glu97, Tyr134, Val135, Pro136, Arg141, Asp200         |
|                       |        |      | Hydrophobic interactions | Ile62, Val70, Lys85, Met101, Val110, Leu132, Thr138, Arg141, Cys199 |
| <b>6b-Glc</b>         | -10.53 | 0.02 | Hydrogen bonds           | Gln72, Lys85, Glu97, Tyr134, Val135, Pro136, Aps200, Phe201         |
|                       |        |      | Hydrophobic interactions | Ile62, Val70, Lys85, Met101, Val110, Leu132, Cys199                 |
| Mannoside derivatives |        |      |                          |                                                                     |
| <b>3a-Man</b>         | -8.12  | 1.12 | Hydrogen bonds           | Gly63, Asn64, Gly65, Lys85, Tyr134, Val135, Cys199, Asp200          |
|                       |        |      | Hydrophobic interactions | Ile62, Val70, Lys85, Met101, Val110, Leu132, Cys199                 |
| <b>4a-Man</b>         | -9.38  | 0.13 | Hydrogen bonds           | Ile62, Glu97, Tyr134, Val135, Arg141, Asn186, Cys199, Asp200        |
|                       |        |      | Hydrophobic interactions | Ile62, Val70, Lys85, Met101, Val110, Leu132, Cys199                 |
| <b>6a-Man</b>         | -10.14 | 0.04 | Hydrogen bonds           | Val61, Gly63, Val135, Asn186, Cys199, Asp200                        |
|                       |        |      | Hydrophobic interactions | Ile62, Val70, Lys85, Met101, Val110, Leu132, Tyr134, Cys199         |
| <b>3b-Man</b>         | -10.35 | 0.03 | Hydrogen bonds           | Ile62, Gly63, Lys85, Glu97, Val135, Asp200, Phe201                  |
|                       |        |      | Hydrophobic interactions | Ile62, Val70, Lys85, Met101, Val110, Leu132, Cys199                 |
| <b>4b-Man</b>         | -8.02  | 1.33 | Hydrogen bonds           | Lys60, Val61, Ile62, Gln72, Asp133, Tyr134, Arg141                  |
|                       |        |      | Hydrophobic interactions | Val61, Ile62, Val70, Ala83, Leu188, Cys199                          |
| <b>6b-Man</b>         | -9.53  | 0.10 | Hydrogen bonds           | Lys60, Gln72, Tyr143, Val135, Asn186, Cys199                        |
|                       |        |      | Hydrophobic interactions | Lys60, Ile62, Val70, Val110, Leu132, Leu188, Cys199                 |





**2a-Man:** -8.12 kcal/mol

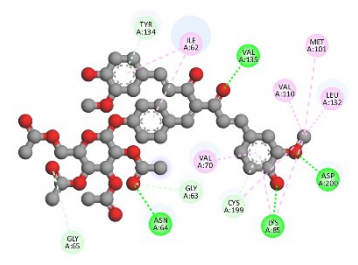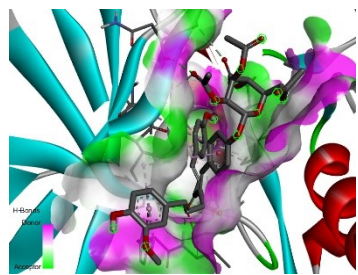

**3a-Man:** -9.38 kcal/mol

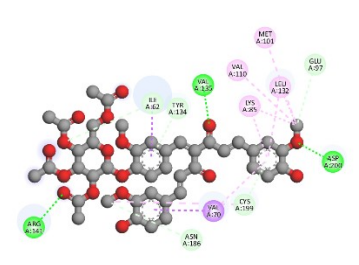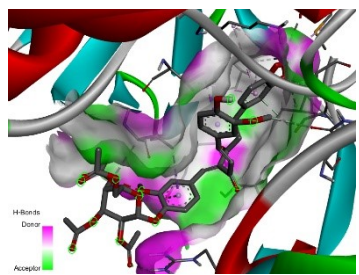

**4a-Man:** -10.14 kcal/mol

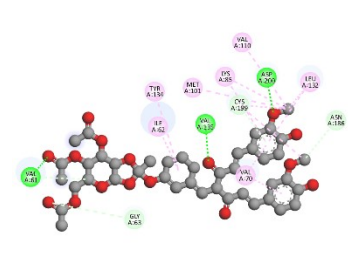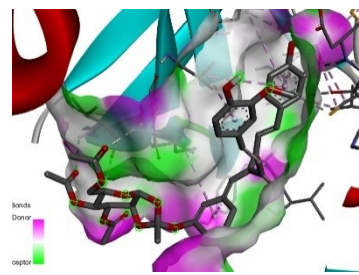

**2b-Man:** -10.35 kcal/mol

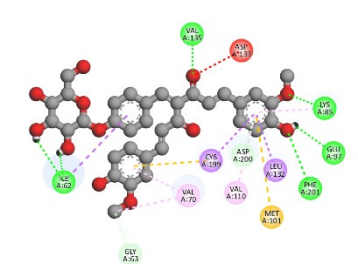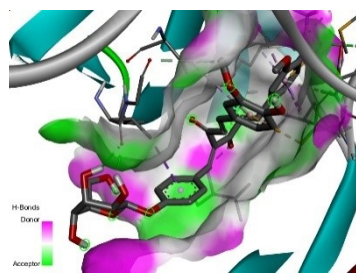

**3b-Man:** -8.02 kcal/mol

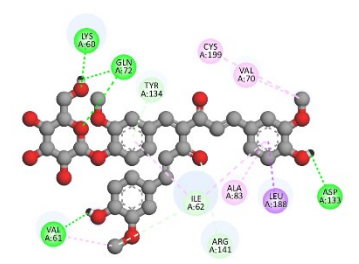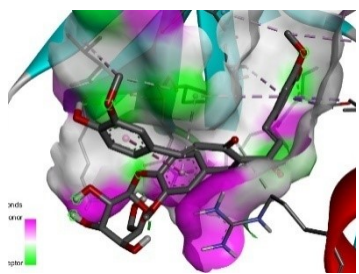

**4b-Man:** -9.53 kcal/mol

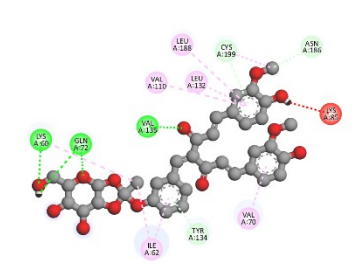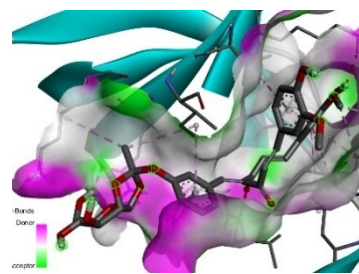

## 6. DFT geometry optimisation analysis

### 6.1 Calculation details for global reactivity analysis

Calculation details of the electronic and global reactivity parameters from DFT calculations [1, 2]

1. Ionisation potential (IP) is defined as  $-E_{HOMO}$
2. Electron affinity (EA) is defined as  $-E_{LUMO}$
3. Chemical potential ( $\mu$ ) is defined as  $-\frac{1}{2}(IP + EA)$ . This represents the energy change of the system which can be defined as the ability of the system to gain electrons. It is correlated with the HOMO and LUMO energy gap, in which the smaller gaps indicate higher chemical reactivity. According to Koopmans' theorem,  $IP = -E_{HOMO}$  and  $EA = -E_{LUMO}$ . Therefore,  $\mu = \frac{1}{2}(E_{HOMO} + E_{LUMO})$
4. Chemical hardness ( $\eta$ ), proposed by Parr and Pearson [3] is defined as  $\eta = \frac{1}{2}(IP - EA)$  and  $\eta = -\frac{1}{2}(E_{HOMO} - E_{LUMO})$
5. Electronegativity ( $\chi$ ) is defined as  $\chi = \frac{1}{2}(IP + EA)$  and  $\chi = -\frac{1}{2}(E_{HOMO} + E_{LUMO})$
6. Electrophilicity index ( $\omega$ ) is defined as  $\frac{\mu^2}{2\eta}$ . This determines the electrophilicity (ability to accept electrons) and nucleophilicity (ability to donate electrons) of a chemical system, which is defined by Parr et al. [3]

## 6.2 Visualisation of HOMO-LUMO band gap

Frontier molecular orbitals (FMOs) which illustrate the HOMO-LUMO energy gap of the glycoside derivatives compounds

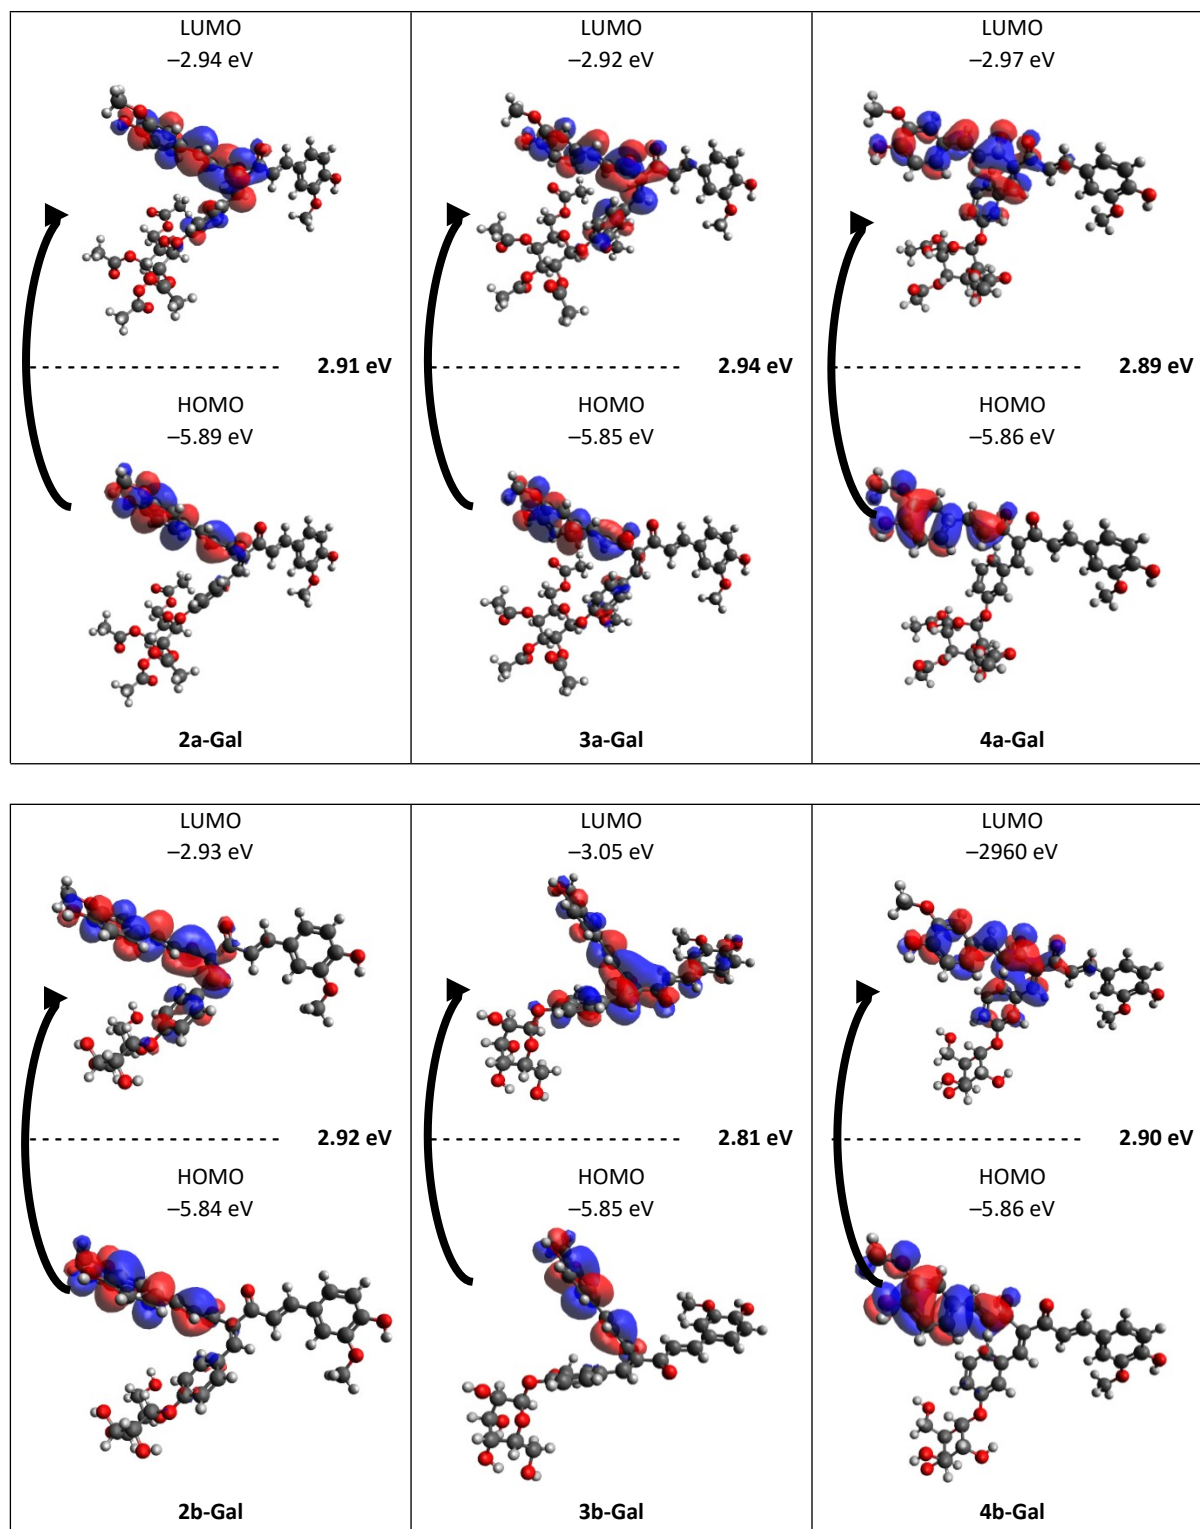

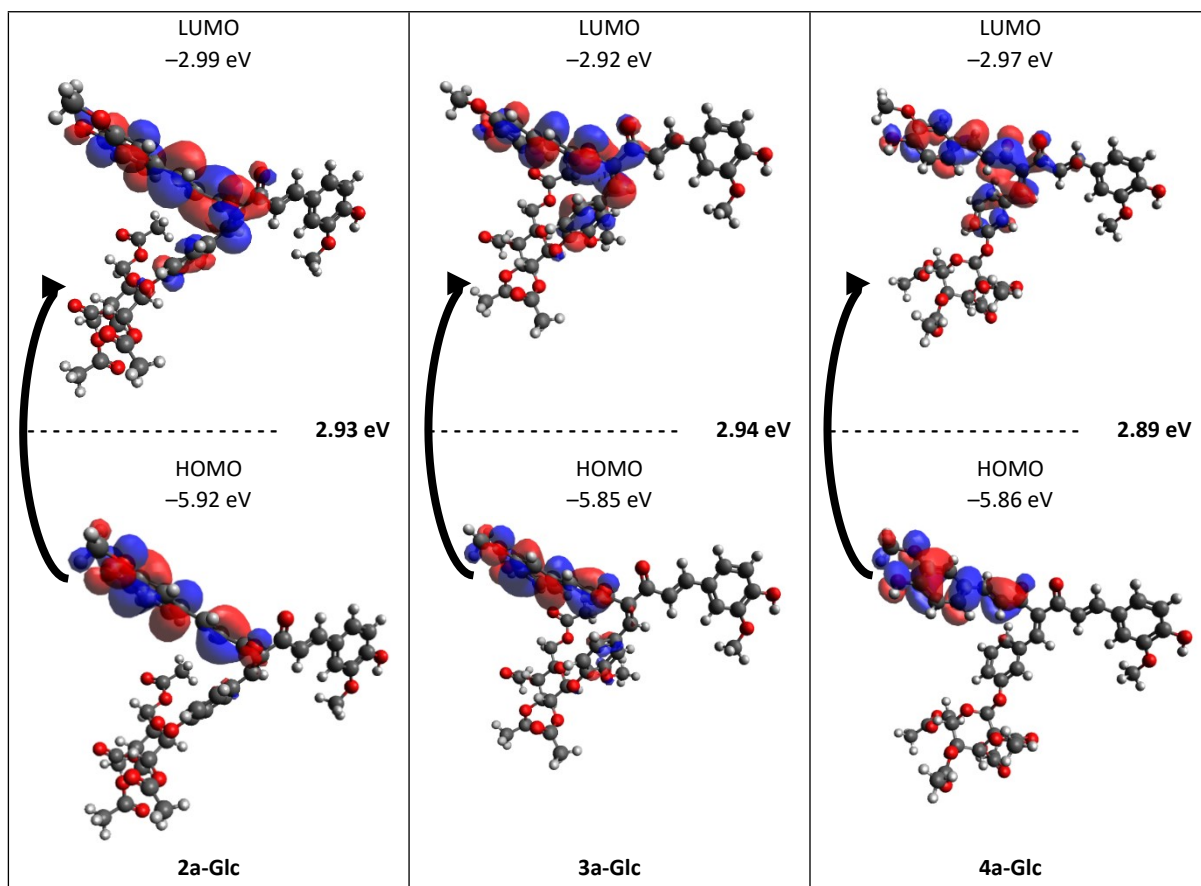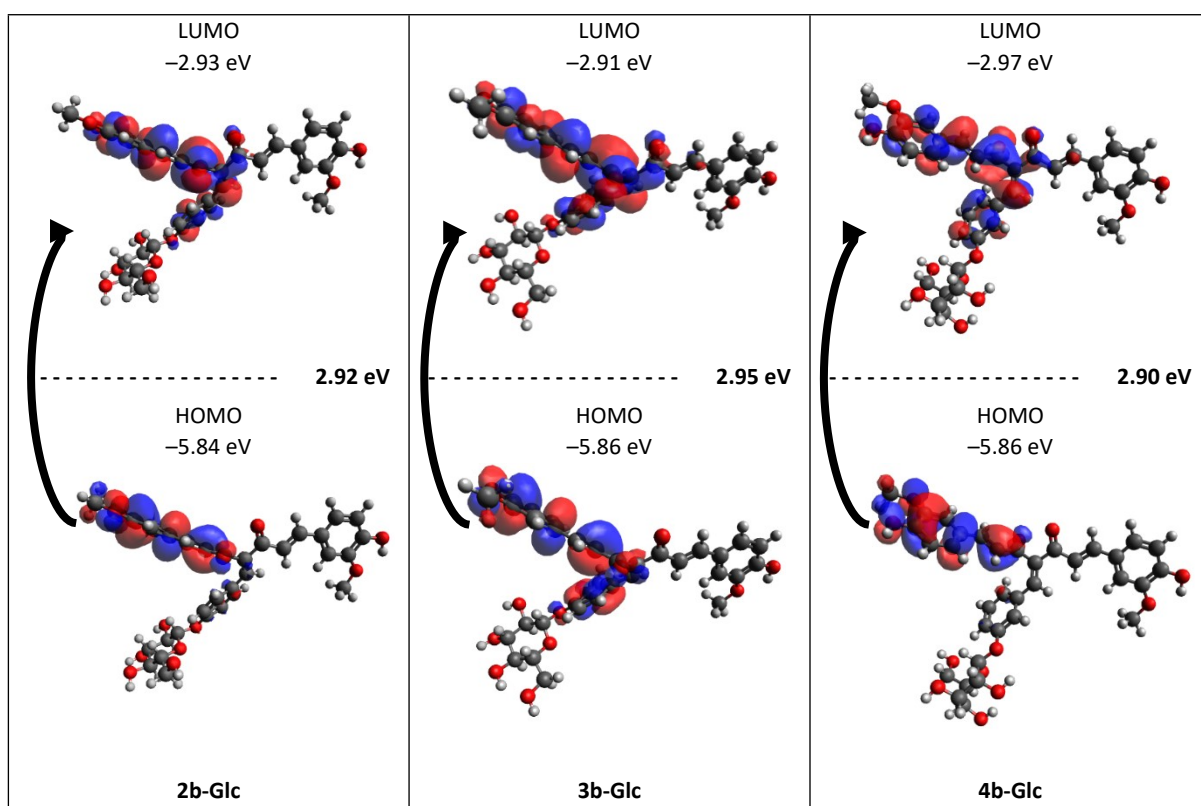

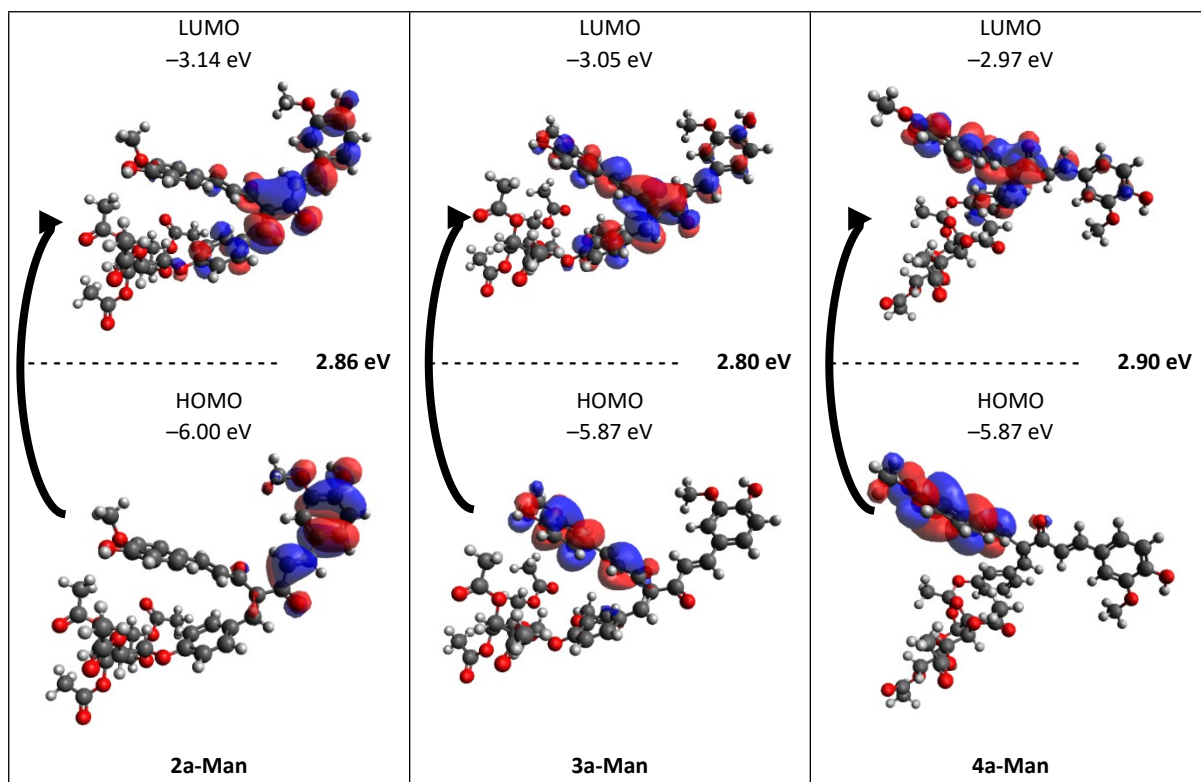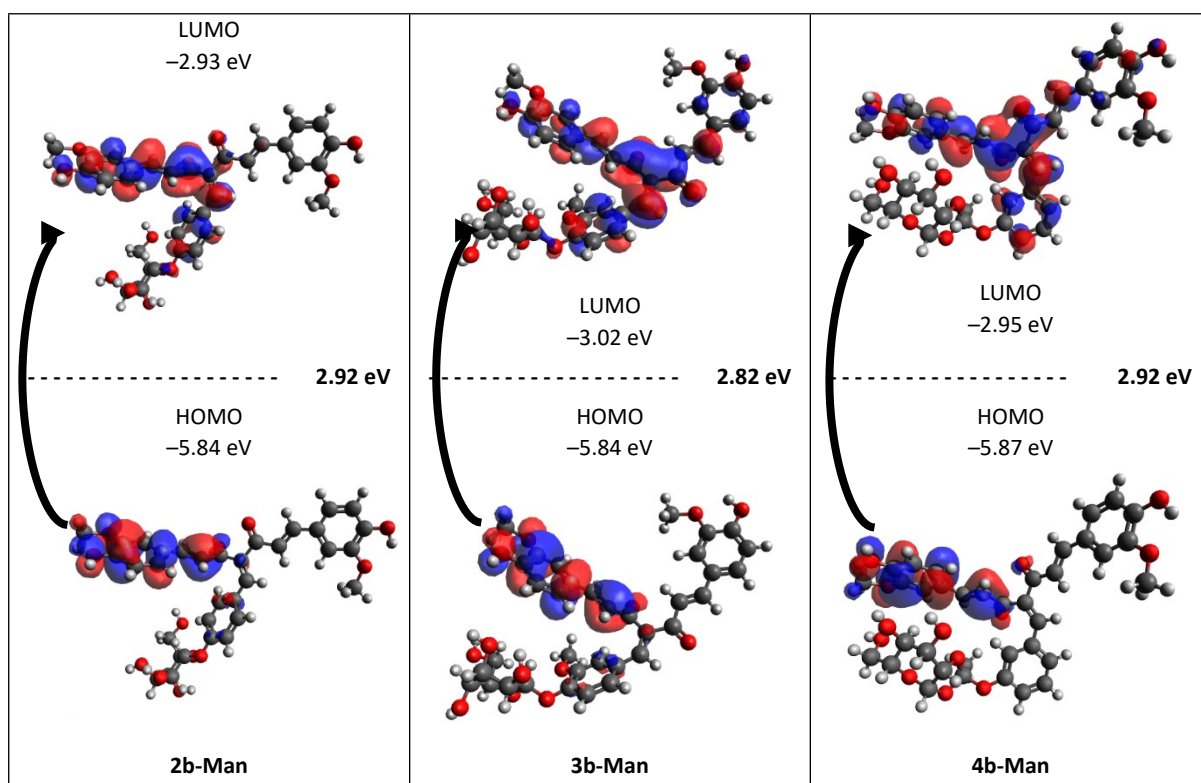

## 7. Haemin binding potential

Isothermal titration calorimetry profiles of the interaction between HMN with glycoside compounds, acquired in a 10 mM sodium phosphate buffer (pH 7.4) at 37 °C

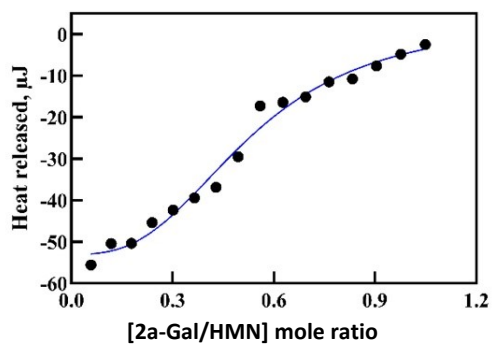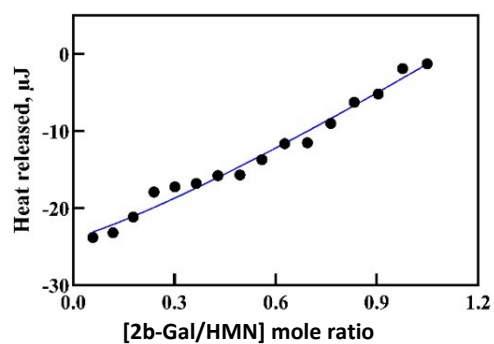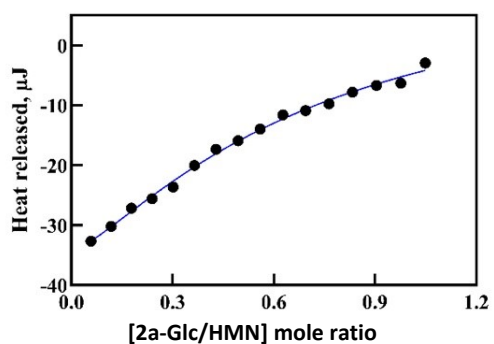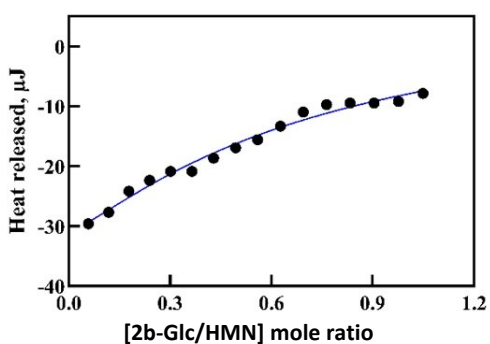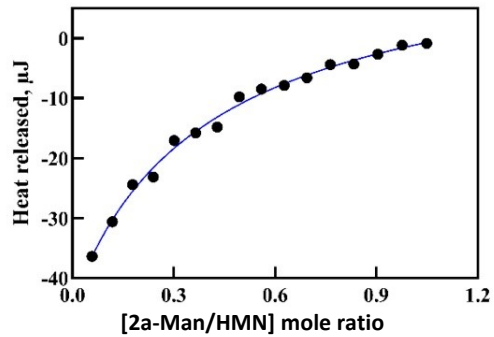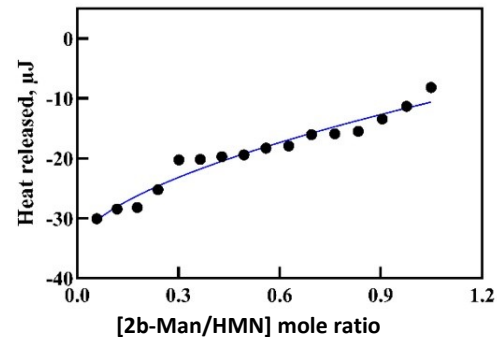

## 8. References

- [1] R. Hazarika and B. Kalita, Elucidating the therapeutic activity of selective curcumin analogues: DFT-based reactivity analysis. *Struct. Chem.* 2021, 32, 1701-1715.
- [2] A. N. Malik, A. Ali, M. Ashfaq, M. N. Tahir, M. M. Alam, M. S. Mostafa and A. Kuznetsov, Asynthetic approach towards drug modification: 2-hydroxy-1-naphthaldehyde based imine-zwitterion preparation, single-crystal study, Hirshfeld surface analysis, and computational investigation. *RSC Adv.* 2024, 14, 6476-6493.
- [3] R. G. Parr and R. G. Pearson Absolute hardness: companion parameter to absolute electronegativity. *J. Am. Chem. Soc.* 1983, 105, 7512-7516.
